# Supplementary material for: Cyclophosphamide enhances the antitumor potency of GITR engagement by increasing oligoclonal cytotoxic T cell fitness
Source: PubMed Central journal article supplement (PMC8564916; doi:10.1172/jci.insight.151035), 2021-10-22
Supplement: jciinsight-6-151035-s182.pdf [file jciinsight-6-151035-s182.pdf]

**Conflict of interest:** TM and JDW are coinventors on patent applications related to CD40 and in situ vaccination (PCT/US2016/045970), filed by MSKCC. JDW is a consultant for Amgen, Astellas, AstraZeneca, Bayer, Bicara Therapeutics, Boehringer Ingelheim, Bristol Myers Squibb, Chugai, Daiichi Sankyo, Dragonfly, Eli Lilly, F Star, Georgiamune, Idera, Imvaq Therapeutics, Kyowa Kirin, Merck, Psioxus, Recepta, Sellas, Surface Oncology, Syndax, Syntalogic Pharmaceuticals, Truvax, Trishula, and Werewolf Therapeutics. JDW receives grant/research support from Bristol Myers Squibb and Sephora. JDW is a consultant and has equity in Tizona Pharmaceuticals, Imvaq Therapeutics, BeiGene, Linneaus Therapeutics, Apricity, Arsenal IO, Georgiamune, Trieza, Maverick Therapeutics, and Ascentage Pharma and is an inventor on patents: Xenogeneic (Canine) DNA Vaccines (US 7,556,805), alphavirus replicon particles expressing TRP2 (PCT/US2010/030423), myeloid-derived suppressor cell (MDSC) assay (PCT/US2013/027475), Newcastle disease virus for cancer therapy (US 10,251,922), vaccinia virus mutants useful for cancer immunotherapy (with TM, US 16/612,127), anti-CD40 agonist mAb fused to monophosphoryl lipid A (MPL) for cancer therapy (with TM, US 15/750,496), antigen-binding proteins targeting melanoma differentiation antigens and uses thereof (US 16/388,245) anti-PD-1 antibody (with TM, US 10,323,091), anti-CTLA4 antibodies (with TM, US 10,144,779), and anti-GITR antibodies and methods of use thereof (with TM, US 10,155,818; US 10,280,226). TM is a consultant for ImmunOs Therapeutics and Pfizer; is cofounder of and equity holder in Imvaq Therapeutics; receives research funding from Bristol Myers Squibb, Surface Oncology, Ikena Oncology, Infinity Pharmaceuticals, Peregrine Pharmaceuticals, Adaptive Biotechnologies, Leap Therapeutics, and Aprea Therapeutics; and is an inventor on patent applications related to oncolytic viral therapy (US 16/980,282), alpha virus-based vaccine (with JDW, PCT/US2010/030423), neo antigen modeling (with JDW, US 16/478,818), and OX40 (US 62/262,371). DH and SB have received royalties from Agenus. DH and TM are coinventors on patent applications related to OX40 antibodies (PCT/US2016/064794), filed by MSKCC. DH is an inventor on patent applications related to contraceptive vaccines (PCT/US2004/006216 and PCT/US2003/029257). ABW is a consultant for lovance, Novartis, Nanobiotix, and Jo'Ann Medical and has received speaking honoraria from LG Chem.

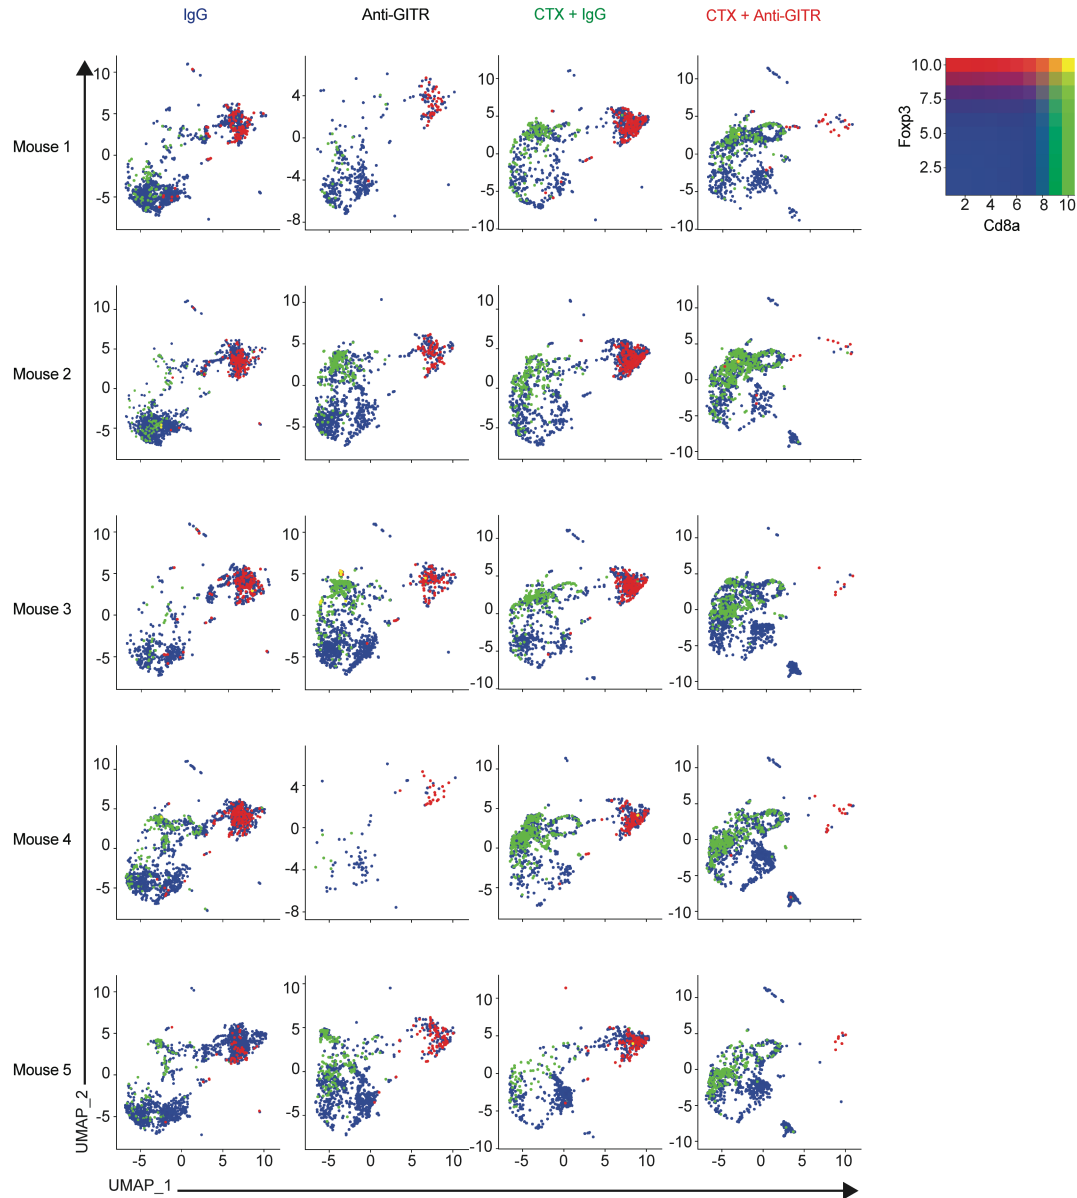

**Supplemental Figure 1: Contribution of individual mice to the decrease in intratumoral Tregs and increases CD8:Treg ratio.** As in previous experiments, mice were implanted with B16 and treated with CTX on day 8 and anti-GITR or control IgG on day 9. Additional cohorts of mice were implanted with B16 on day 8, on day 15 mice were treated with anti-GITR or IgG. After 1 week, all cohorts of mice were sacrificed, and single cell suspensions were prepared from tumors. UMAP plots for each treatment showing individual mice deconvoluted from each analysis are shown for the expression of CD8a and Foxp3.

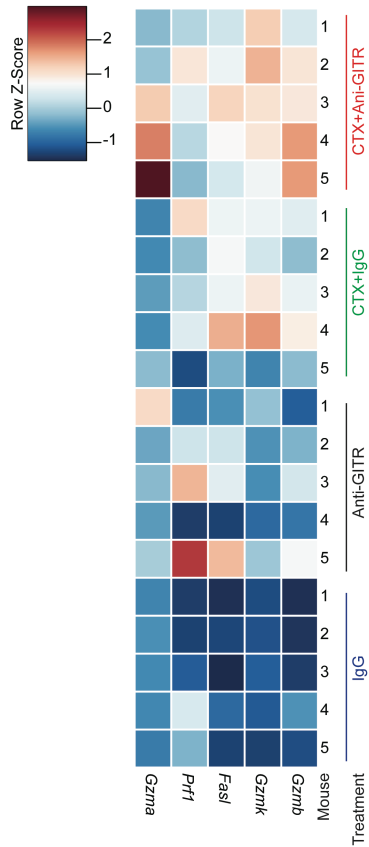

**Supplemental Figure 2: Contribution of individual mice to the cytolytic program of CD8+ T cells.** Cohorts of mice were implanted with B16. On day 8, CTX was injected. The next day, mice were treated with anti-GITR antibody or IgG. Additional cohorts of mice were implanted with B16 on day 8, on day 15 mice were treated with anti-GITR antibody or IgG. After 1 week, all cohorts of mice were sacrificed, and single cell suspensions were prepared. Asynchronous B16 challenge was needed for the CTX groups a week apart given the lack of immune infiltrates caused by chemotherapy treatment. Single cell suspensions were stained with anti-CD5 T cells and hashtag multiplex antibodies. The cells were FACs sorted based on CD5+ and next next-generation TCR coupled with 10X sequencing was performed. Heat map of selected cytolytic genes on CD8+ T cells from mice in each treatment group is shown here with an increase in expression in the combination treated group.

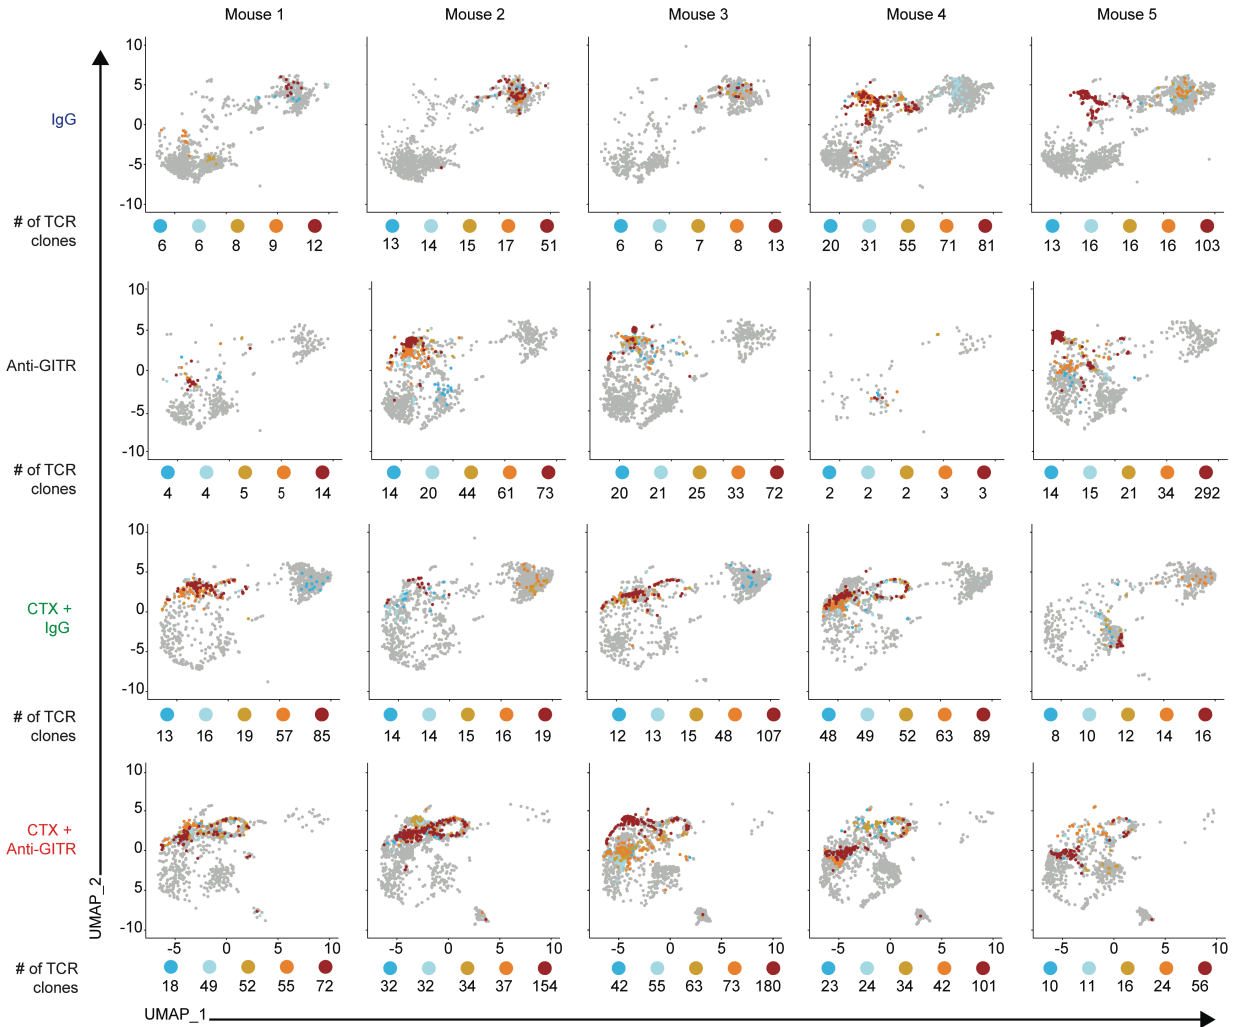

**Supplemental Figure 3: Number of overrepresented TCR clones in individual mice per treatment.** Cohorts of mice were implanted with B16. On day 8, CTX was injected. The next day, mice were treated with anti-GITR antibody or IgG. Additional cohorts of mice were implanted with B16 on day 8, on day 15 mice were treated with anti-GITR antibody or IgG. After 1 week, all cohorts of mice were sacrificed, and single cell suspensions were prepared. Asynchronous B16 challenge was needed for the CTX groups a week apart given the lack of immune infiltrates caused by chemotherapy treatment. Single cell suspensions were stained with anti-CD5 T cells and hashtag multiplex antibodies. The cells were FACS sorted based on CD5+ and next next-generation TCR coupled with 10X sequencing was performed. UMAPs showing the top 5 overrepresented clones deconvoluted from individual mice per treatment. Number below each colored circle represents the total number of cells in each clone.

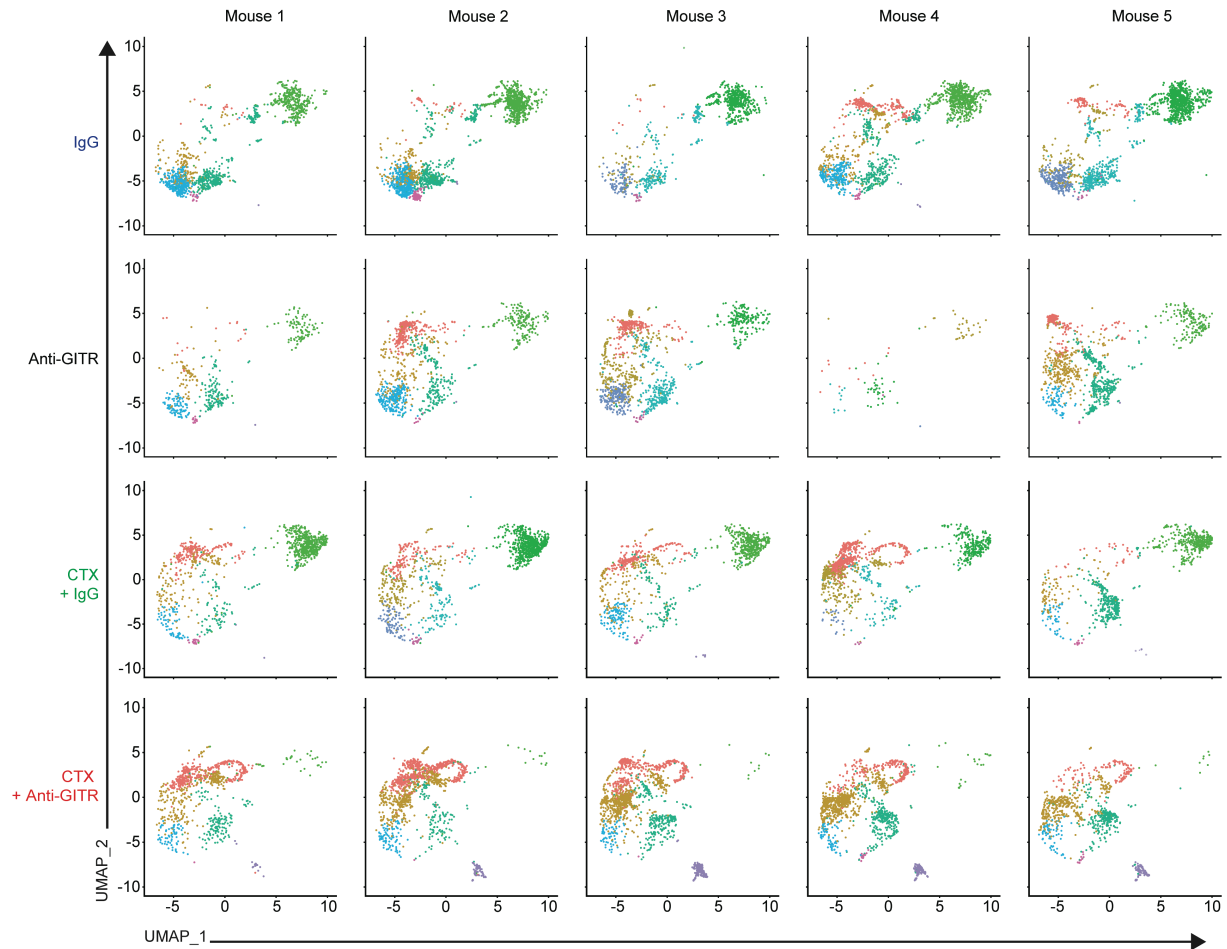

**Supplemental Figure 4: Cluster distribution in individual mice per treatment.** Cohorts of mice were implanted with B16. On day 8, CTX was injected. The next day, mice were treated with anti-GITR antibody or rat IgG. For the same experiment, additional cohorts of mice were implanted with B16 on day 8, on day 15 mice were treated with DTA or IgG. After 1 week, all cohorts of mice were sacrificed, and single cell suspensions were prepared. Asynchronous B16 implant was needed for the CTX groups a week apart given the lack of immune infiltrates caused by chemotherapy treatment. Single cells suspensions were stained for anti-CD5 T cells and hashtag multiplex antibodies. The cells were FACs sorted based on CD5+ and next next-generation TCR coupled with 10X sequencing was performed. UMAP showing the population of cells deconvoluted from individual mice per treatment.

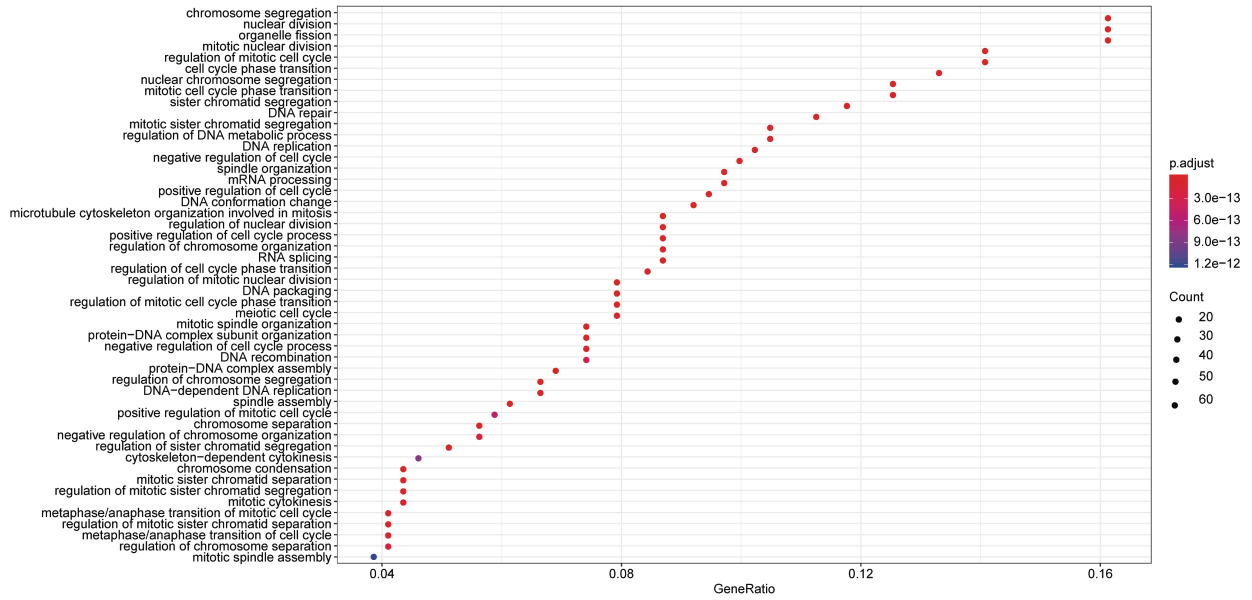

**Supplemental Figure 5: Pathway analysis of CD8 Ki67 cells.** Dot plot of enriched terms from GO overrepresentation analysis in the context of selected CD8 Ki67 cluster. The circle represents the counts of enriched genes in the signatures. P value is shown in the legend.

## Supplemental Table 1: Sequences of the top 10 over-represented clones

| <b>IgG</b>                                                       |
|------------------------------------------------------------------|
| TRA:CALGEDYSNNRLTL; TRB:CASSQTRDWAYEQYF, 107                     |
| TRA:CAVRTPDYANKMIF; TRB:CASSLNTGQLYF, 83                         |
| TRA:CAAKDYSNNRLTL; TRB:CASSVGLGEDTQYF, 80                        |
| TRA:CAATDYSNNRLTL; TRB:CASSLELGGLEQYF, 62                        |
| TRA:CAVSRGSALGRLHF; TRB:CSSSQRGRGERLFF, 52                       |
| TRA:CILRVSGGNNKLTFF; TRB:CASSLSGGWYAEQFF, 32                     |
| TRA:CAAEDYSNNRLTL; TRB:CASSQVQGSATLYF, 21                        |
| TRA:CALGYGSSGNKLIF; TRB:CASSQEGSQNTLYF, 19                       |
| TRA:CAAKGNTGNYKYVF; TRB:CASSQEWGGEQYF, 17                        |
| TRA:CALELDSNYQLIW; TRB:CASSRLGGGQNTLYF, 16                       |
|                                                                  |
| <b>Anti-GITR</b>                                                 |
| TRA:CSAKDYSNNRLTL; TRB:CASSQVQGANERLFF, 293                      |
| TRA:CAAKDYSNNRLTL; TRB:CASSQDKGANTEVFF, 73                       |
| TRA:CAMRDPGTQVVGQLTF; TRA:CALSDDYSNNRLTL; TRB:CASSPPGSSETLYF, 72 |
| TRA:CALSEPNSNNRIFF; TRA:CALDMNYNQKLIFF; TRB:CASSFGTGQLYF, 61     |
| TRA:CAMERDYSNNRLTL; TRB:CASSLELGGTEQFF, 44                       |
| TRA:CALNGNYGSSGNKLIF; TRA:CALRGTTASLGKLQF, TRB:CASSGGDQNTLYF, 34 |
| TRA:CSASNPDYSNNRLTL; TRB:CASSRTGGSQNTLYF,33                      |
| TRA:CALSPDYSNNRLTL; TRB:CASSQVPDPNSDYTF, 25                      |
| TRA:CAAMDYSNNRLTL; TRB:CASSQGQGADTEVFF, 21                       |
| TRA:CALSDDYSNNRLTL; TRB:CASSQGQGSQNTLYF, 21                      |
|                                                                  |
| <b>CTX + IgG</b>                                                 |
| TRA:CALGDTNAYKVIF; TRA:CALVDLSGSGGKLTLL; TRB:CASTPLSSNTEVFF, 107 |
| TRA:CALFHDTNAYKVIF; TRB:CASSIRGVTEVFF,92                         |
| TRA:CAAKDYSNNRLTL; TRB:CASSQVGNNERLFF, 85                        |
| TRB:CASSRTGFTEVFF, 63                                            |
| TRA:CAAGGDTNAYKVIF; TRA:CALGADSGGSNAKLTF; TRB:CAWSGGSAETLYF, 58  |
| TRA:CALGHDTNAYKVIF; TRB:CASSYSGNTLF,52                           |
| TRA:CALGDPWQGGRALIF; TRB:CGARGQASAETLYF, 49                      |
| TRA:CALGGDTNAYKVIF; TRB:CASTPLSSNTEVFF,48                        |
| TRA:CALSSDTNAYKVIF; TRB:CASSRTGFTEVFF, 48                        |
| TRA:CAMREASGGGSNAKLTF; TRB:CASTPTANSDYTF, 34                     |
|                                                                  |

**CTX + Anti-GITR**

TRA:CAMEQDYSNNRLTL; TRB:CASSLELGGLEQYF, 180

TRA:CALGHDTNAYKVIF; TRB:CASTINYAEQFF,155

TRA:CAASTLNSNNRIFF; TRB:CASTWTGYAEQFF, 101

TRA:CAVSDSNYQLIW; TRB:CASRTGSDYTF, 74

TRA:CADTGNYKYVF; TRA:CALGGDTBAYKVIF; TRB:CASSIQGSNTEVFF, 72

TRA:CALEGDYANKMIF; TRB:CASSENSYEQYF, 63

TRA:CAVMDSNYQLIW; TRB:CASSLVGTGNAEQFF,56

TRA:CAVSPPDYSNNRLTL; TRB:CASSGGQDTQYF; TRB:CGAREGGGYEQYF,56

TRA:CAASWSGGSNYKLTF; TRB:CASSQDRGYEQYF, 55

TRA:CALGHDTNAYKVIF; TRA:CALGGDTNAYKVIF; TRB:CASSLLGSQNTLYF, 52



**Supplemental Table 2: Uniquely expressed genes in each cell type**

| <b>p_val</b> | <b>avg_logFC</b> | <b>pct.1</b> | <b>pct.2</b> | <b>p_val_adj</b> | <b>cluster</b> | <b>gene</b> |
|--------------|------------------|--------------|--------------|------------------|----------------|-------------|
| 0            | 1.100761271      | 0.556        | 0.115        | 0                | Cd8 Activated  | Trgv2       |
| 0            | 1.038199885      | 0.942        | 0.354        | 0                | Cd8 Activated  | Cd8a        |
| 0            | 1.017141622      | 0.398        | 0.153        | 0                | Cd8 Activated  | Stmn1       |
| 0            | 0.99188134       | 0.584        | 0.168        | 0                | Cd8 Activated  | Prf1        |
| 0            | 0.976310222      | 0.628        | 0.185        | 0                | Cd8 Activated  | Gzmk        |
| 0            | 0.94119479       | 0.368        | 0.095        | 0                | Cd8 Activated  | Ube2c       |
| 0            | 0.93175756       | 0.992        | 0.727        | 0                | Cd8 Activated  | Nkg7        |
| 0            | 0.931188736      | 0.952        | 0.408        | 0                | Cd8 Activated  | Cd8b1       |
| 0            | 0.83552887       | 0.937        | 0.441        | 0                | Cd8 Activated  | Cxcr6       |
| 0            | 0.826706751      | 0.775        | 0.265        | 0                | Cd8 Activated  | Lag3        |
| 0            | 0.823090617      | 0.287        | 0.056        | 0                | Cd8 Activated  | Birc5       |
| 0            | 0.75611558       | 0.881        | 0.428        | 0                | Cd8 Activated  | Pdcd1       |
| 0            | 0.753574993      | 0.473        | 0.123        | 0                | Cd8 Activated  | Ccl3        |
| 0            | 0.748780893      | 0.679        | 0.326        | 0                | Cd8 Activated  | Klrd1       |
| 0            | 0.745932673      | 0.945        | 0.676        | 0                | Cd8 Activated  | Ccl5        |
| 0            | 0.722013905      | 0.591        | 0.202        | 0                | Cd8 Activated  | Klrc1       |
| 0            | 0.716038555      | 0.922        | 0.632        | 0                | Cd8 Activated  | Sh2d2a      |
| 0            | 0.714613546      | 0.279        | 0.049        | 0                | Cd8 Activated  | Ccnb2       |
| 0            | 0.703803347      | 0.661        | 0.195        | 0                | Cd8 Activated  | Ccl4        |
| 0            | 0.638135184      | 0.937        | 0.673        | 0                | Cd8 Activated  | Ctsd        |
| 0            | 0.626794054      | 0.62         | 0.237        | 0                | Cd8 Activated  | Tox         |
| 0            | 0.598751948      | 0.29         | 0.071        | 0                | Cd8 Activated  | Cks1b       |
| 0            | 0.577686823      | 0.636        | 0.294        | 0                | Cd8 Activated  | Lgals3      |
| 0            | 0.574421637      | 0.955        | 0.666        | 0                | Cd8 Activated  | Anxa2       |
| 0            | 0.565420631      | 0.938        | 0.544        | 0                | Cd8 Activated  | Ctsw        |
| 0            | 0.563175246      | 0.69         | 0.328        | 0                | Cd8 Activated  | Il10ra      |
| 0            | 0.554204118      | 0.47         | 0.16         | 0                | Cd8 Activated  | Rgs16       |
| 0            | 0.522432762      | 0.758        | 0.349        | 0                | Cd8 Activated  | Litaf       |
| 0            | 0.521522974      | 0.606        | 0.252        | 0                | Cd8 Activated  | Klrk1       |
| 0            | 0.516865377      | 0.837        | 0.483        | 0                | Cd8 Activated  | Efhd2       |
| 0            | 0.512672048      | 0.973        | 0.787        | 0                | Cd8 Activated  | Sub1        |
| 0            | 0.512286613      | 0.921        | 0.652        | 0                | Cd8 Activated  | Txn1        |
| 0            | 0.49984547       | 0.489        | 0.147        | 0                | Cd8 Activated  | Arsb        |
| 0            | 0.488340199      | 0.993        | 0.869        | 0                | Cd8 Activated  | Lgals1      |
| 0            | 0.463336965      | 0.392        | 0.117        | 0                | Cd8 Activated  | Havcr2      |

|           |             |       |       |           |               |            |
|-----------|-------------|-------|-------|-----------|---------------|------------|
| 0         | 0.445408401 | 0.646 | 0.301 | 0         | Cd8 Activated | Casp3      |
| 0         | 0.441469791 | 0.917 | 0.654 | 0         | Cd8 Activated | Zyx        |
| 0         | 0.435731172 | 0.999 | 0.941 | 0         | Cd8 Activated | AW112010   |
| 0         | 0.43248169  | 0.256 | 0.044 | 0         | Cd8 Activated | AC163354.1 |
| 0         | 0.42805917  | 0.545 | 0.2   | 0         | Cd8 Activated | Fasl       |
| 0         | 0.412477107 | 0.512 | 0.179 | 0         | Cd8 Activated | Ifng       |
| 0         | 0.410748105 | 0.449 | 0.162 | 0         | Cd8 Activated | Chst12     |
| 0         | 0.401209731 | 0.254 | 0.044 | 0         | Cd8 Activated | Tcrg-C2    |
| 0         | 0.397841203 | 0.378 | 0.119 | 0         | Cd8 Activated | Plek       |
| 0         | 0.391981079 | 0.286 | 0.061 | 0         | Cd8 Activated | Wdr95      |
| 0         | 0.37746055  | 0.994 | 0.94  | 0         | Cd8 Activated | Cd3g       |
| 0         | 0.369041464 | 0.299 | 0.072 | 0         | Cd8 Activated | Gpd2       |
| 0         | 0.358938107 | 0.979 | 0.856 | 0         | Cd8 Activated | Myl12a     |
| 0         | 0.342380048 | 1     | 0.997 | 0         | Cd8 Activated | Tmsb4x     |
| 0         | 0.329233262 | 0.274 | 0.072 | 0         | Cd8 Activated | Gm17745    |
| 0         | 0.322205036 | 0.278 | 0.074 | 0         | Cd8 Activated | Tmem163    |
| 0         | 0.320606403 | 0.995 | 0.945 | 0         | Cd8 Activated | Cd3e       |
| 1.04E-307 | 0.436181471 | 0.694 | 0.362 | 1.67E-303 | Cd8 Activated | Sh2d1a     |
| 1.11E-303 | 0.431377735 | 0.715 | 0.385 | 1.78E-299 | Cd8 Activated | Ptms       |
| 6.77E-301 | 0.372589255 | 0.978 | 0.813 | 1.08E-296 | Cd8 Activated | S100a11    |
| 7.24E-300 | 0.424264626 | 0.563 | 0.26  | 1.16E-295 | Cd8 Activated | Serpinb6a  |
| 1.12E-299 | 0.325107833 | 0.989 | 0.924 | 1.79E-295 | Cd8 Activated | Rbm3       |
| 2.69E-296 | 0.507600876 | 0.938 | 0.765 | 4.31E-292 | Cd8 Activated | S100a6     |
| 1.45E-293 | 0.441863384 | 0.832 | 0.528 | 2.33E-289 | Cd8 Activated | Cst7       |
| 2.47E-282 | 0.275886841 | 0.995 | 0.928 | 3.95E-278 | Cd8 Activated | Cox8a      |
| 7.33E-278 | 0.340408666 | 0.49  | 0.206 | 1.17E-273 | Cd8 Activated | Sema4a     |
| 6.83E-275 | 0.439951529 | 0.265 | 0.076 | 1.10E-270 | Cd8 Activated | Klre1      |
| 1.55E-273 | 0.392305711 | 0.362 | 0.129 | 2.48E-269 | Cd8 Activated | Nr4a2      |
| 8.02E-273 | 0.780468634 | 0.272 | 0.082 | 1.29E-268 | Cd8 Activated | Pclaf      |
| 3.78E-266 | 0.389212181 | 0.761 | 0.449 | 6.06E-262 | Cd8 Activated | Gng2       |
| 1.25E-263 | 0.332451466 | 0.313 | 0.103 | 2.00E-259 | Cd8 Activated | Eomes      |
| 3.17E-260 | 0.43397913  | 0.58  | 0.289 | 5.08E-256 | Cd8 Activated | Dut        |
| 7.21E-243 | 0.677703817 | 0.653 | 0.411 | 1.16E-238 | Cd8 Activated | Hmgn2      |
| 1.48E-242 | 0.294750638 | 0.991 | 0.863 | 2.38E-238 | Cd8 Activated | Thy1       |
| 1.78E-240 | 0.354970509 | 0.877 | 0.605 | 2.86E-236 | Cd8 Activated | B4galnt1   |
| 1.89E-232 | 0.357631271 | 0.907 | 0.662 | 3.02E-228 | Cd8 Activated | Id2        |
| 4.16E-231 | 0.308815077 | 0.471 | 0.213 | 6.67E-227 | Cd8 Activated | Stard3nl   |
| 1.81E-226 | 0.294446513 | 0.252 | 0.079 | 2.91E-222 | Cd8 Activated | Cenpw      |
| 5.52E-220 | 0.314057221 | 0.947 | 0.766 | 8.84E-216 | Cd8 Activated | Cox5a      |

|           |             |       |       |           |               |           |
|-----------|-------------|-------|-------|-----------|---------------|-----------|
| 4.23E-219 | 0.306417158 | 0.955 | 0.797 | 6.78E-215 | Cd8 Activated | Cox5b     |
| 1.91E-217 | 0.458366065 | 0.643 | 0.387 | 3.07E-213 | Cd8 Activated | Selenoh   |
| 5.38E-216 | 0.266156364 | 0.256 | 0.083 | 8.62E-212 | Cd8 Activated | Cd38      |
| 3.98E-212 | 0.340584425 | 0.767 | 0.488 | 6.38E-208 | Cd8 Activated | Ech1      |
| 1.16E-210 | 0.278996422 | 0.359 | 0.145 | 1.86E-206 | Cd8 Activated | Plscr1    |
| 4.09E-209 | 0.276857275 | 1     | 0.991 | 6.56E-205 | Cd8 Activated | Ppia      |
| 5.75E-209 | 0.330492204 | 0.629 | 0.351 | 9.22E-205 | Cd8 Activated | Cox17     |
| 1.10E-207 | 0.262215064 | 0.992 | 0.928 | 1.76E-203 | Cd8 Activated | Clic1     |
| 1.73E-205 | 0.403380875 | 0.656 | 0.392 | 2.77E-201 | Cd8 Activated | Dap       |
| 1.03E-204 | 0.271123104 | 0.99  | 0.918 | 1.65E-200 | Cd8 Activated | Calm1     |
| 1.93E-204 | 0.656506403 | 0.444 | 0.226 | 3.09E-200 | Cd8 Activated | Cenpa     |
| 1.15E-198 | 0.256090532 | 0.384 | 0.162 | 1.84E-194 | Cd8 Activated | Atp8b4    |
| 3.68E-196 | 0.306830317 | 0.885 | 0.658 | 5.91E-192 | Cd8 Activated | Gdi2      |
| 1.44E-194 | 0.260234711 | 0.336 | 0.135 | 2.31E-190 | Cd8 Activated | Adam8     |
| 6.74E-193 | 0.278076511 | 0.421 | 0.19  | 1.08E-188 | Cd8 Activated | Slamf7    |
| 4.14E-192 | 0.262022799 | 0.985 | 0.786 | 6.63E-188 | Cd8 Activated | Ms4a4b    |
| 1.14E-186 | 0.319569848 | 0.624 | 0.363 | 1.82E-182 | Cd8 Activated | Acadl     |
| 7.00E-184 | 0.323260203 | 0.804 | 0.564 | 1.12E-179 | Cd8 Activated | Calm3     |
| 9.61E-183 | 0.354882839 | 0.965 | 0.827 | 1.54E-178 | Cd8 Activated | Arl6ip1   |
| 1.51E-181 | 0.284364088 | 0.369 | 0.161 | 2.42E-177 | Cd8 Activated | Cd160     |
| 2.37E-179 | 0.308747139 | 0.454 | 0.225 | 3.80E-175 | Cd8 Activated | Serpinb6b |
| 9.28E-175 | 0.318833179 | 0.401 | 0.191 | 1.49E-170 | Cd8 Activated | Abcb9     |
| 2.76E-174 | 0.36987087  | 0.918 | 0.777 | 4.42E-170 | Cd8 Activated | Hmgb1     |
| 1.30E-173 | 0.324142049 | 0.678 | 0.424 | 2.09E-169 | Cd8 Activated | Nap1l1    |
| 1.81E-170 | 0.268021926 | 0.533 | 0.285 | 2.90E-166 | Cd8 Activated | Ndfip2    |
| 7.06E-164 | 0.253429619 | 0.969 | 0.828 | 1.13E-159 | Cd8 Activated | Lsp1      |
| 1.28E-162 | 0.263836104 | 0.422 | 0.206 | 2.06E-158 | Cd8 Activated | Armc7     |
| 6.19E-160 | 0.259317013 | 0.417 | 0.205 | 9.92E-156 | Cd8 Activated | Ctsc      |
| 6.72E-160 | 0.265221556 | 0.894 | 0.706 | 1.08E-155 | Cd8 Activated | Atp5f1    |
| 4.86E-158 | 0.370667475 | 0.856 | 0.668 | 7.79E-154 | Cd8 Activated | Ran       |
| 6.84E-158 | 0.282100646 | 0.557 | 0.315 | 1.10E-153 | Cd8 Activated | Acot7     |
| 1.34E-157 | 0.288051203 | 0.847 | 0.627 | 2.15E-153 | Cd8 Activated | Prdx1     |
| 1.78E-153 | 0.265154535 | 0.618 | 0.366 | 2.85E-149 | Cd8 Activated | Uqcc2     |
| 2.61E-153 | 0.273694796 | 0.654 | 0.408 | 4.19E-149 | Cd8 Activated | Atpif1    |
| 7.58E-146 | 0.393052541 | 0.534 | 0.32  | 1.22E-141 | Cd8 Activated | Plac8     |
| 1.47E-145 | 0.252134953 | 0.401 | 0.201 | 2.36E-141 | Cd8 Activated | Rpa2      |
| 1.06E-144 | 0.455882212 | 0.752 | 0.56  | 1.69E-140 | Cd8 Activated | H2afv     |
| 6.69E-142 | 0.298517259 | 0.266 | 0.114 | 1.07E-137 | Cd8 Activated | Racgap1   |
| 2.28E-141 | 0.298089299 | 0.308 | 0.142 | 3.66E-137 | Cd8 Activated | Gm42031   |

|           |             |       |       |           |               |         |
|-----------|-------------|-------|-------|-----------|---------------|---------|
| 6.06E-141 | 0.258825052 | 0.623 | 0.377 | 9.71E-137 | Cd8 Activated | S100a4  |
| 2.36E-140 | 0.777108176 | 0.837 | 0.675 | 3.78E-136 | Cd8 Activated | Hmgb2   |
| 8.76E-138 | 0.252694533 | 0.844 | 0.628 | 1.40E-133 | Cd8 Activated | Rap1a   |
| 6.62E-137 | 0.264559278 | 0.647 | 0.408 | 1.06E-132 | Cd8 Activated | Slc25a4 |
| 1.34E-136 | 0.301231773 | 0.583 | 0.357 | 2.14E-132 | Cd8 Activated | Ptpn6   |
| 1.04E-135 | 0.257617308 | 0.718 | 0.475 | 1.66E-131 | Cd8 Activated | Pstpip1 |
| 4.77E-131 | 0.258725862 | 0.814 | 0.599 | 7.64E-127 | Cd8 Activated | Hsp90b1 |
| 5.52E-127 | 0.271923705 | 0.667 | 0.436 | 8.85E-123 | Cd8 Activated | Trbc2   |
| 5.04E-113 | 0.265724483 | 0.653 | 0.44  | 8.08E-109 | Cd8 Activated | Dbi     |
| 2.03E-110 | 0.322636166 | 0.301 | 0.154 | 3.26E-106 | Cd8 Activated | Cks2    |
| 1.90E-97  | 0.28503127  | 0.37  | 0.214 | 3.04E-93  | Cd8 Activated | Ube2s   |
| 2.31E-89  | 0.602940154 | 0.37  | 0.228 | 3.71E-85  | Cd8 Activated | H2afx   |
| 7.21E-51  | 0.38448071  | 0.296 | 0.197 | 1.16E-46  | Cd8 Activated | Tuba1b  |
| 4.86E-47  | 0.448295958 | 0.475 | 0.358 | 7.80E-43  | Cd8 Activated | Tubb4b  |
| 6.29E-42  | 0.53885413  | 0.784 | 0.67  | 1.01E-37  | Cd8 Activated | Tubb5   |
| 0         | 1.191536    | 0.835 | 0.398 | 0         | Cd8           | Ly6c2   |
| 0         | 0.880024493 | 0.596 | 0.295 | 0         | Cd8           | Plac8   |
| 0         | 0.859619459 | 0.858 | 0.411 | 0         | Cd8           | Cd8b1   |
| 0         | 0.773943016 | 0.551 | 0.188 | 0         | Cd8           | Gzmk    |
| 0         | 0.750007584 | 0.601 | 0.239 | 0         | Cd8           | Klrk1   |
| 0         | 0.745827171 | 0.901 | 0.677 | 0         | Cd8           | Ccl5    |
| 0         | 0.710102776 | 0.836 | 0.358 | 0         | Cd8           | Cd8a    |
| 0         | 0.691765249 | 0.524 | 0.204 | 0         | Cd8           | Klrc1   |
| 0         | 0.669603069 | 0.55  | 0.233 | 0         | Cd8           | Jaml    |
| 0         | 0.641235497 | 0.9   | 0.538 | 0         | Cd8           | Ctsw    |
| 0         | 0.616331836 | 0.981 | 0.719 | 0         | Cd8           | Nkg7    |
| 0         | 0.602589035 | 0.972 | 0.781 | 0         | Cd8           | Ms4a4b  |
| 0         | 0.519055001 | 0.444 | 0.175 | 0         | Cd8           | Slamf7  |
| 0         | 0.50782029  | 0.855 | 0.655 | 0         | Cd8           | Epsti1  |
| 0         | 0.436677016 | 0.648 | 0.319 | 0         | Cd8           | Klrd1   |
| 3.31E-250 | 0.620806184 | 0.439 | 0.211 | 5.31E-246 | Cd8           | Ifit3   |
| 7.70E-229 | 0.42042632  | 0.679 | 0.452 | 1.23E-224 | Cd8           | Dnajc15 |
| 7.16E-225 | 0.369416698 | 0.55  | 0.302 | 1.15E-220 | Cd8           | Evl     |
| 3.50E-220 | 0.370921996 | 0.357 | 0.16  | 5.61E-216 | Cd8           | Atp8b4  |
| 8.95E-218 | 0.364351777 | 0.909 | 0.781 | 1.43E-213 | Cd8           | Ms4a6b  |
| 1.53E-217 | 0.540079422 | 0.429 | 0.218 | 2.45E-213 | Cd8           | Usp18   |
| 1.18E-207 | 0.383615565 | 0.352 | 0.157 | 1.88E-203 | Cd8           | Cd160   |
| 2.93E-207 | 0.372728415 | 0.429 | 0.216 | 4.70E-203 | Cd8           | Fasl    |
| 5.02E-206 | 0.290503011 | 0.963 | 0.865 | 8.05E-202 | Cd8           | Thy1    |

|           |             |       |       |           |     |          |
|-----------|-------------|-------|-------|-----------|-----|----------|
| 7.80E-205 | 0.297824229 | 0.75  | 0.47  | 1.25E-200 | Cd8 | Cxcr6    |
| 2.68E-195 | 0.491949902 | 0.355 | 0.169 | 4.30E-191 | Cd8 | Ms4a4c   |
| 4.64E-175 | 0.310869136 | 0.314 | 0.142 | 7.43E-171 | Cd8 | St3gal6  |
| 1.51E-167 | 0.387409971 | 0.471 | 0.275 | 2.42E-163 | Cd8 | Ifi208   |
| 2.86E-164 | 0.302829491 | 0.4   | 0.208 | 4.58E-160 | Cd8 | Gramd3   |
| 4.39E-157 | 0.30388209  | 0.809 | 0.649 | 7.03E-153 | Cd8 | Sp100    |
| 7.12E-155 | 0.340296525 | 0.384 | 0.207 | 1.14E-150 | Cd8 | Armc7    |
| 1.17E-146 | 0.326293562 | 0.582 | 0.38  | 1.88E-142 | Cd8 | Itgb1    |
| 1.75E-136 | 0.313096264 | 0.826 | 0.673 | 2.81E-132 | Cd8 | Id2      |
| 3.38E-135 | 0.328735203 | 0.314 | 0.159 | 5.42E-131 | Cd8 | Ifit1bl1 |
| 1.35E-132 | 0.301738257 | 0.516 | 0.328 | 2.17E-128 | Cd8 | Ctla2a   |
| 3.66E-132 | 0.294846581 | 0.508 | 0.325 | 5.86E-128 | Cd8 | Sp110    |
| 7.52E-131 | 0.466140768 | 0.424 | 0.249 | 1.21E-126 | Cd8 | Cd7      |
| 7.68E-125 | 0.283368326 | 0.646 | 0.467 | 1.23E-120 | Cd8 | Gng2     |
| 1.55E-123 | 0.280336434 | 0.681 | 0.51  | 2.48E-119 | Cd8 | Efhd2    |
| 3.55E-121 | 0.312830199 | 0.46  | 0.29  | 5.69E-117 | Cd8 | Ifi213   |
| 1.87E-120 | 0.312339524 | 0.778 | 0.637 | 3.00E-116 | Cd8 | Bst2     |
| 1.25E-119 | 0.267443444 | 0.277 | 0.138 | 2.01E-115 | Cd8 | Gpr18    |
| 9.59E-119 | 0.257314727 | 0.825 | 0.667 | 1.54E-114 | Cd8 | Zyx      |
| 6.35E-117 | 0.507417638 | 0.607 | 0.456 | 1.02E-112 | Cd8 | Isg15    |
| 2.16E-114 | 0.269382747 | 0.288 | 0.15  | 3.47E-110 | Cd8 | Fam26f   |
| 1.18E-111 | 0.256883044 | 0.381 | 0.224 | 1.90E-107 | Cd8 | Sema4a   |
| 2.96E-110 | 0.272930844 | 0.293 | 0.156 | 4.74E-106 | Cd8 | Ifi214   |
| 6.30E-110 | 0.277239086 | 0.801 | 0.673 | 1.01E-105 | Cd8 | Txn1     |
| 1.83E-105 | 0.303446618 | 0.682 | 0.535 | 2.94E-101 | Cd8 | Zbp1     |
| 4.51E-105 | 0.376206583 | 0.39  | 0.242 | 7.23E-101 | Cd8 | Ifit1    |
| 1.33E-104 | 0.259804663 | 0.747 | 0.609 | 2.13E-100 | Cd8 | Psmb10   |
| 2.29E-103 | 0.323131428 | 0.662 | 0.509 | 3.67E-99  | Cd8 | Irf7     |
| 2.22E-100 | 0.40282127  | 0.475 | 0.323 | 3.55E-96  | Cd8 | Lgals3   |
| 5.03E-98  | 0.2987369   | 0.547 | 0.392 | 8.06E-94  | Cd8 | Ifi209   |
| 4.25E-97  | 0.272549615 | 0.785 | 0.661 | 6.82E-93  | Cd8 | Ifi47    |
| 2.55E-95  | 0.416139092 | 0.673 | 0.523 | 4.09E-91  | Cd8 | Gzmb     |
| 4.01E-92  | 0.250304523 | 0.327 | 0.194 | 6.42E-88  | Cd8 | Phf11c   |
| 2.15E-75  | 0.278699619 | 0.715 | 0.583 | 3.44E-71  | Cd8 | Hspe1    |
| 1.88E-70  | 0.259028437 | 0.404 | 0.279 | 3.01E-66  | Cd8 | Gbp2     |
| 8.78E-67  | 0.258002066 | 0.418 | 0.302 | 1.41E-62  | Cd8 | Mcm6     |
| 5.91E-65  | 0.276446744 | 0.556 | 0.433 | 9.48E-61  | Cd8 | Phf11b   |
| 2.29E-17  | 0.320280604 | 0.611 | 0.549 | 3.67E-13  | Cd8 | Hsp90aa1 |
| 1.00E-15  | 0.282111248 | 0.428 | 0.362 | 1.61E-11  | Cd8 | Dnajb1   |

|   |             |       |       |   |      |          |
|---|-------------|-------|-------|---|------|----------|
| 0 | 2.208022423 | 0.952 | 0.219 | 0 | Treg | Tnfrsf4  |
| 0 | 1.939777943 | 0.843 | 0.034 | 0 | Treg | Foxp3    |
| 0 | 1.778113314 | 0.712 | 0.102 | 0 | Treg | Cd74     |
| 0 | 1.710295443 | 0.878 | 0.349 | 0 | Treg | Tnfrsf9  |
| 0 | 1.659525889 | 0.864 | 0.267 | 0 | Treg | Ctla4    |
| 0 | 1.521867518 | 0.965 | 0.562 | 0 | Treg | Tnfrsf18 |
| 0 | 1.381466488 | 0.841 | 0.226 | 0 | Treg | Ikzf2    |
| 0 | 1.338833805 | 0.475 | 0.08  | 0 | Treg | Klrg1    |
| 0 | 1.330049456 | 0.897 | 0.507 | 0 | Treg | Glrx     |
| 0 | 1.327432588 | 0.637 | 0.101 | 0 | Treg | Izumo1r  |
| 0 | 1.298177391 | 0.799 | 0.296 | 0 | Treg | Ass1     |
| 0 | 1.293867688 | 0.479 | 0.075 | 0 | Treg | Ccr8     |
| 0 | 1.287535712 | 0.514 | 0.039 | 0 | Treg | Cd81     |
| 0 | 1.154552671 | 0.774 | 0.41  | 0 | Treg | Ddit4    |
| 0 | 1.133126112 | 0.547 | 0.101 | 0 | Treg | Il2ra    |
| 0 | 1.131532689 | 0.924 | 0.682 | 0 | Treg | Sdf4     |
| 0 | 1.116880195 | 0.89  | 0.564 | 0 | Treg | Pglyrp1  |
| 0 | 1.097332444 | 0.938 | 0.512 | 0 | Treg | Capg     |
| 0 | 1.09437058  | 0.441 | 0.083 | 0 | Treg | Bmyc     |
| 0 | 1.094113759 | 0.796 | 0.466 | 0 | Treg | Odc1     |
| 0 | 1.084354058 | 0.795 | 0.38  | 0 | Treg | Icos     |
| 0 | 1.045655544 | 0.817 | 0.481 | 0 | Treg | Zfp36l1  |
| 0 | 0.98936367  | 0.842 | 0.476 | 0 | Treg | Tigit    |
| 0 | 0.945718748 | 0.88  | 0.468 | 0 | Treg | Itgb7    |
| 0 | 0.944212652 | 0.783 | 0.451 | 0 | Treg | Dusp1    |
| 0 | 0.931410513 | 0.678 | 0.289 | 0 | Treg | Gm2a     |
| 0 | 0.919755093 | 0.8   | 0.451 | 0 | Treg | Itm2c    |
| 0 | 0.885525935 | 0.543 | 0.215 | 0 | Treg | Itgav    |
| 0 | 0.872066711 | 0.787 | 0.418 | 0 | Treg | Hif1a    |
| 0 | 0.869229144 | 0.892 | 0.657 | 0 | Treg | Nfkbia   |
| 0 | 0.868562491 | 0.491 | 0.13  | 0 | Treg | Ramp1    |
| 0 | 0.866273066 | 0.807 | 0.466 | 0 | Treg | Pim1     |
| 0 | 0.864421808 | 0.452 | 0.16  | 0 | Treg | Slc16a3  |
| 0 | 0.859375185 | 0.639 | 0.291 | 0 | Treg | Ighm     |
| 0 | 0.852324395 | 0.654 | 0.305 | 0 | Treg | Samsn1   |
| 0 | 0.839483154 | 0.959 | 0.808 | 0 | Treg | Cd2      |
| 0 | 0.824373592 | 0.559 | 0.158 | 0 | Treg | Tspan32  |
| 0 | 0.813873466 | 0.628 | 0.25  | 0 | Treg | Psen2    |
| 0 | 0.806370546 | 0.354 | 0.028 | 0 | Treg | Ebi3     |

|   |             |       |       |   |      |          |
|---|-------------|-------|-------|---|------|----------|
| 0 | 0.790901054 | 0.987 | 0.933 | 0 | Treg | Srgn     |
| 0 | 0.781867928 | 0.495 | 0.11  | 0 | Treg | Maf      |
| 0 | 0.780720807 | 0.609 | 0.34  | 0 | Treg | Ccr2     |
| 0 | 0.772950188 | 0.453 | 0.095 | 0 | Treg | Snx9     |
| 0 | 0.771575293 | 0.322 | 0.033 | 0 | Treg | Ecm1     |
| 0 | 0.767320491 | 0.971 | 0.871 | 0 | Treg | Pkm      |
| 0 | 0.754060382 | 0.809 | 0.51  | 0 | Treg | Cd5      |
| 0 | 0.740010581 | 0.511 | 0.212 | 0 | Treg | Dgat1    |
| 0 | 0.734319238 | 0.504 | 0.2   | 0 | Treg | Tnfrsf1b |
| 0 | 0.724271482 | 0.469 | 0.2   | 0 | Treg | H1f0     |
| 0 | 0.71823505  | 0.972 | 0.825 | 0 | Treg | Ly6a     |
| 0 | 0.711663207 | 0.605 | 0.29  | 0 | Treg | Snx20    |
| 0 | 0.711422104 | 0.446 | 0.121 | 0 | Treg | Sdcbp2   |
| 0 | 0.711416617 | 0.985 | 0.849 | 0 | Treg | Ifi2712a |
| 0 | 0.711138283 | 0.96  | 0.845 | 0 | Treg | Vim      |
| 0 | 0.70728679  | 0.375 | 0.078 | 0 | Treg | Arl5a    |
| 0 | 0.706998382 | 0.365 | 0.131 | 0 | Treg | Bnip3    |
| 0 | 0.689102136 | 0.546 | 0.261 | 0 | Treg | Bcl3     |
| 0 | 0.687135258 | 0.326 | 0.053 | 0 | Treg | Matk     |
| 0 | 0.67908133  | 0.72  | 0.444 | 0 | Treg | Crlf2    |
| 0 | 0.675915356 | 0.495 | 0.231 | 0 | Treg | Fgl2     |
| 0 | 0.674450719 | 0.706 | 0.423 | 0 | Treg | Isg20    |
| 0 | 0.670136473 | 0.465 | 0.194 | 0 | Treg | Cebpb    |
| 0 | 0.663422933 | 0.394 | 0.113 | 0 | Treg | Fam110a  |
| 0 | 0.656448281 | 0.389 | 0.099 | 0 | Treg | Wls      |
| 0 | 0.655721116 | 0.701 | 0.463 | 0 | Treg | M6pr     |
| 0 | 0.64915011  | 0.46  | 0.162 | 0 | Treg | Ctsz     |
| 0 | 0.647282607 | 0.357 | 0.124 | 0 | Treg | Ccrl2    |
| 0 | 0.646789854 | 0.995 | 0.965 | 0 | Treg | Ly6e     |
| 0 | 0.64038399  | 0.642 | 0.391 | 0 | Treg | Tmem123  |
| 0 | 0.631598602 | 0.596 | 0.345 | 0 | Treg | Wnk1     |
| 0 | 0.628882855 | 0.553 | 0.154 | 0 | Treg | Cd4      |
| 0 | 0.626670779 | 0.803 | 0.561 | 0 | Treg | Cmtm7    |
| 0 | 0.625191839 | 0.456 | 0.188 | 0 | Treg | Sdhaf1   |
| 0 | 0.615561923 | 0.408 | 0.179 | 0 | Treg | Mxd1     |
| 0 | 0.606812161 | 0.27  | 0.026 | 0 | Treg | Rapsn    |
| 0 | 0.606620263 | 0.627 | 0.364 | 0 | Treg | Ubl3     |
| 0 | 0.602029399 | 0.478 | 0.206 | 0 | Treg | Trp53i11 |
| 0 | 0.595239846 | 0.613 | 0.339 | 0 | Treg | Mif4gd   |

|   |             |       |       |   |      |          |
|---|-------------|-------|-------|---|------|----------|
| 0 | 0.59463223  | 0.652 | 0.394 | 0 | Treg | Sat1     |
| 0 | 0.59045076  | 0.777 | 0.579 | 0 | Treg | Ctsb     |
| 0 | 0.583312957 | 0.607 | 0.352 | 0 | Treg | Cish     |
| 0 | 0.581648171 | 0.348 | 0.107 | 0 | Treg | Snx18    |
| 0 | 0.581076606 | 0.623 | 0.363 | 0 | Treg | Dusp5    |
| 0 | 0.569139366 | 0.908 | 0.821 | 0 | Treg | Npc2     |
| 0 | 0.566779976 | 0.277 | 0.038 | 0 | Treg | C1qtnf12 |
| 0 | 0.565115422 | 0.833 | 0.692 | 0 | Treg | Pgk1     |
| 0 | 0.56456079  | 0.279 | 0.049 | 0 | Treg | Lamc1    |
| 0 | 0.558431014 | 0.683 | 0.465 | 0 | Treg | Sla      |
| 0 | 0.55188219  | 0.45  | 0.205 | 0 | Treg | Crem     |
| 0 | 0.545117301 | 0.66  | 0.434 | 0 | Treg | Pkp3     |
| 0 | 0.541337922 | 0.39  | 0.131 | 0 | Treg | Tmem154  |
| 0 | 0.538881653 | 0.86  | 0.746 | 0 | Treg | Gpx4     |
| 0 | 0.538839414 | 0.399 | 0.173 | 0 | Treg | Il3ra    |
| 0 | 0.534300808 | 0.677 | 0.472 | 0 | Treg | Ctss     |
| 0 | 0.531110061 | 0.931 | 0.853 | 0 | Treg | Ifngr1   |
| 0 | 0.53106697  | 0.866 | 0.728 | 0 | Treg | Rap1b    |
| 0 | 0.528366315 | 0.287 | 0.081 | 0 | Treg | Lmna     |
| 0 | 0.52817243  | 0.786 | 0.583 | 0 | Treg | Lrp10    |
| 0 | 0.522841285 | 0.637 | 0.414 | 0 | Treg | Cyb5a    |
| 0 | 0.522553963 | 0.379 | 0.157 | 0 | Treg | Serinc3  |
| 0 | 0.519165639 | 0.797 | 0.643 | 0 | Treg | Ypel3    |
| 0 | 0.51867164  | 0.39  | 0.166 | 0 | Treg | P2ry10   |
| 0 | 0.513621027 | 0.795 | 0.615 | 0 | Treg | Samhd1   |
| 0 | 0.499147752 | 0.346 | 0.138 | 0 | Treg | Hacd3    |
| 0 | 0.49503425  | 0.275 | 0.069 | 0 | Treg | Aldoc    |
| 0 | 0.491130425 | 0.46  | 0.226 | 0 | Treg | Gna15    |
| 0 | 0.465605758 | 0.26  | 0.073 | 0 | Treg | Socs2    |
| 0 | 0.464218926 | 0.274 | 0.079 | 0 | Treg | Rarg     |
| 0 | 0.460786163 | 0.755 | 0.603 | 0 | Treg | Coro1b   |
| 0 | 0.459741693 | 0.936 | 0.841 | 0 | Treg | Ndfip1   |
| 0 | 0.452897642 | 0.833 | 0.707 | 0 | Treg | Cd37     |
| 0 | 0.451351525 | 0.318 | 0.112 | 0 | Treg | Arhgap31 |
| 0 | 0.444273646 | 0.811 | 0.684 | 0 | Treg | Rhog     |
| 0 | 0.44267523  | 0.998 | 0.995 | 0 | Treg | H2-K1    |
| 0 | 0.440877799 | 0.907 | 0.804 | 0 | Treg | Pnrc1    |
| 0 | 0.43498059  | 0.999 | 0.996 | 0 | Treg | Actg1    |
| 0 | 0.431809547 | 0.998 | 0.994 | 0 | Treg | H2-D1    |



|           |             |       |       |           |      |               |
|-----------|-------------|-------|-------|-----------|------|---------------|
| 0         | 0.430387579 | 0.968 | 0.918 | 0         | Treg | S100a10       |
| 0         | 0.428387918 | 0.395 | 0.146 | 0         | Treg | Selenop       |
| 0         | 0.422875712 | 0.949 | 0.891 | 0         | Treg | Ptprcap       |
| 0         | 0.422285095 | 0.986 | 0.983 | 0         | Treg | Fth1          |
| 0         | 0.392156909 | 0.961 | 0.92  | 0         | Treg | Ldha          |
| 0         | 0.357002863 | 0.99  | 0.974 | 0         | Treg | Shisa5        |
| 0         | 0.32752818  | 0.979 | 0.963 | 0         | Treg | Fxyd5         |
| 0         | 0.305731719 | 0.978 | 0.956 | 0         | Treg | Itm2b         |
| 4.58E-305 | 0.511000334 | 0.635 | 0.42  | 7.34E-301 | Treg | Rhoh          |
| 4.75E-300 | 0.549382672 | 0.59  | 0.382 | 7.61E-296 | Treg | Syngn2        |
| 5.22E-300 | 0.410023727 | 0.964 | 0.915 | 8.37E-296 | Treg | Aldoa         |
| 2.35E-299 | 0.549948655 | 0.665 | 0.463 | 3.77E-295 | Treg | Traf1         |
| 2.85E-298 | 0.532617113 | 0.78  | 0.605 | 4.57E-294 | Treg | Gimap7        |
| 5.26E-295 | 0.52023352  | 0.78  | 0.585 | 8.43E-291 | Treg | Tpi1          |
| 2.23E-290 | 0.483942589 | 0.935 | 0.882 | 3.58E-286 | Treg | Ltb           |
| 6.89E-286 | 0.520212111 | 0.296 | 0.104 | 1.10E-281 | Treg | ligp1         |
| 9.26E-278 | 0.498367878 | 0.481 | 0.264 | 1.48E-273 | Treg | Snx2          |
| 5.88E-272 | 0.473181951 | 0.784 | 0.628 | 9.43E-268 | Treg | Jund          |
| 3.49E-270 | 0.41905388  | 0.281 | 0.101 | 5.59E-266 | Treg | Sytl1         |
| 6.96E-267 | 0.522976394 | 0.5   | 0.287 | 1.12E-262 | Treg | Mxd4          |
| 3.63E-266 | 0.457172905 | 0.414 | 0.201 | 5.81E-262 | Treg | Retreg1       |
| 1.86E-260 | 0.546746133 | 0.562 | 0.357 | 2.98E-256 | Treg | Rilpl2        |
| 3.54E-259 | 0.658464467 | 0.721 | 0.498 | 5.68E-255 | Treg | Gzmb          |
| 3.22E-258 | 0.553406487 | 0.715 | 0.531 | 5.16E-254 | Treg | Zfp36         |
| 4.02E-257 | 0.344344121 | 0.946 | 0.908 | 6.45E-253 | Treg | Il2rg         |
| 2.05E-255 | 0.511093971 | 0.649 | 0.475 | 3.29E-251 | Treg | Cd27          |
| 1.34E-253 | 0.497566232 | 0.527 | 0.322 | 2.14E-249 | Treg | Lbh           |
| 5.46E-250 | 0.438704347 | 0.446 | 0.225 | 8.75E-246 | Treg | Rora          |
| 6.26E-248 | 0.477568788 | 0.352 | 0.158 | 1.00E-243 | Treg | Phlda1        |
| 2.87E-245 | 0.384278987 | 0.278 | 0.106 | 4.60E-241 | Treg | Sypl          |
| 3.39E-245 | 0.45032335  | 0.547 | 0.329 | 5.43E-241 | Treg | Rgs10         |
| 4.02E-245 | 0.735972684 | 0.289 | 0.114 | 6.44E-241 | Treg | Mt1           |
| 8.98E-245 | 0.443215884 | 0.472 | 0.265 | 1.44E-240 | Treg | Spint2        |
| 5.48E-242 | 0.430386978 | 0.772 | 0.643 | 8.79E-238 | Treg | Tap1          |
| 9.33E-236 | 0.422598603 | 0.803 | 0.683 | 1.50E-231 | Treg | Cytip         |
| 4.63E-235 | 0.431050042 | 0.285 | 0.116 | 7.42E-231 | Treg | 1700017B05Rik |
| 2.07E-234 | 0.561629486 | 0.36  | 0.178 | 3.32E-230 | Treg | Chchd10       |
| 1.01E-231 | 0.446388932 | 0.661 | 0.476 | 1.62E-227 | Treg | Cd6           |
| 1.05E-231 | 0.444997584 | 0.265 | 0.102 | 1.68E-227 | Treg | Nrip1         |

|           |             |       |       |           |      |          |
|-----------|-------------|-------|-------|-----------|------|----------|
| 1.71E-230 | 0.454897825 | 0.544 | 0.352 | 2.74E-226 | Treg | Ptpn7    |
| 2.32E-230 | 0.405462788 | 0.89  | 0.806 | 3.71E-226 | Treg | Gapdh    |
| 8.96E-230 | 0.486525428 | 0.344 | 0.16  | 1.44E-225 | Treg | Rgs2     |
| 2.75E-228 | 0.391529274 | 0.767 | 0.65  | 4.41E-224 | Treg | Slc9a3r1 |
| 2.52E-227 | 0.432008002 | 0.298 | 0.128 | 4.03E-223 | Treg | Slc25a19 |
| 9.63E-227 | 0.413882706 | 0.441 | 0.242 | 1.54E-222 | Treg | Tmbim4   |
| 1.83E-226 | 0.313040562 | 0.927 | 0.884 | 2.93E-222 | Treg | Ucp2     |
| 3.69E-225 | 0.43327909  | 0.4   | 0.212 | 5.91E-221 | Treg | Unc119   |
| 1.34E-222 | 0.54942583  | 0.326 | 0.15  | 2.14E-218 | Treg | Hilpda   |
| 1.18E-220 | 0.384977886 | 0.372 | 0.182 | 1.89E-216 | Treg | Smco4    |
| 1.86E-220 | 0.314985772 | 0.876 | 0.807 | 2.97E-216 | Treg | Gnb2     |
| 1.33E-209 | 0.430520868 | 0.555 | 0.377 | 2.13E-205 | Treg | Rhof     |
| 2.67E-209 | 0.359430667 | 0.831 | 0.738 | 4.28E-205 | Treg | Leprotl1 |
| 1.56E-208 | 0.404674896 | 0.875 | 0.807 | 2.50E-204 | Treg | H2-T22   |
| 5.18E-201 | 0.294104095 | 0.878 | 0.813 | 8.30E-197 | Treg | Rac1     |
| 1.43E-196 | 0.413015945 | 0.665 | 0.484 | 2.29E-192 | Treg | Cxcr3    |
| 8.61E-196 | 0.386679297 | 0.385 | 0.199 | 1.38E-191 | Treg | Ube2l6   |
| 1.24E-195 | 0.430002303 | 0.57  | 0.394 | 1.99E-191 | Treg | Cdc42se2 |
| 3.93E-195 | 0.2662315   | 0.901 | 0.858 | 6.30E-191 | Treg | Arf5     |
| 1.15E-194 | 0.527984154 | 0.381 | 0.203 | 1.84E-190 | Treg | Gadd45b  |
| 1.77E-194 | 0.432594569 | 0.428 | 0.252 | 2.83E-190 | Treg | Glipr1   |
| 4.85E-193 | 0.392426213 | 0.499 | 0.306 | 7.77E-189 | Treg | Foxo1    |
| 2.72E-192 | 0.3246222   | 0.875 | 0.767 | 4.36E-188 | Treg | Il2rb    |
| 5.80E-192 | 0.397278876 | 0.281 | 0.126 | 9.30E-188 | Treg | Coro2a   |
| 2.38E-191 | 0.403480813 | 0.29  | 0.131 | 3.81E-187 | Treg | Plk3     |
| 8.16E-191 | 0.40229042  | 0.331 | 0.163 | 1.31E-186 | Treg | Fam129a  |
| 1.21E-190 | 0.337196176 | 0.729 | 0.585 | 1.93E-186 | Treg | Vamp8    |
| 2.00E-189 | 0.346072324 | 0.804 | 0.696 | 3.21E-185 | Treg | Gimap1   |
| 1.03E-186 | 0.402399802 | 0.319 | 0.156 | 1.65E-182 | Treg | Ttc39c   |
| 9.63E-185 | 0.423853719 | 0.392 | 0.225 | 1.54E-180 | Treg | Impa2    |
| 1.21E-183 | 0.398148002 | 0.376 | 0.202 | 1.95E-179 | Treg | Galnt6   |
| 2.28E-181 | 0.477239331 | 0.334 | 0.173 | 3.65E-177 | Treg | Got1     |
| 6.62E-181 | 0.318032689 | 0.262 | 0.11  | 1.06E-176 | Treg | Arl5c    |
| 4.77E-179 | 0.384966605 | 0.445 | 0.27  | 7.65E-175 | Treg | Eva1b    |
| 9.99E-177 | 0.370506837 | 0.655 | 0.509 | 1.60E-172 | Treg | Hcls1    |
| 1.44E-176 | 0.422941813 | 0.669 | 0.503 | 2.31E-172 | Treg | Rgs1     |
| 2.05E-176 | 0.377758451 | 0.584 | 0.427 | 3.28E-172 | Treg | Gimp     |
| 6.13E-175 | 0.430548909 | 0.301 | 0.149 | 9.82E-171 | Treg | Nfil3    |
| 3.80E-171 | 0.292732734 | 0.911 | 0.865 | 6.08E-167 | Treg | Gpi1     |

|           |             |       |       |           |      |          |
|-----------|-------------|-------|-------|-----------|------|----------|
| 1.72E-170 | 0.300757397 | 0.978 | 0.969 | 2.75E-166 | Treg | Malat1   |
| 1.18E-166 | 0.391326059 | 0.366 | 0.203 | 1.89E-162 | Treg | Nfkb2    |
| 2.20E-166 | 0.391574948 | 0.503 | 0.34  | 3.53E-162 | Treg | Jak3     |
| 8.47E-165 | 0.259303919 | 0.921 | 0.867 | 1.36E-160 | Treg | Tmbim6   |
| 6.14E-163 | 0.394639005 | 0.39  | 0.225 | 9.85E-159 | Treg | Plec     |
| 1.43E-162 | 0.360959094 | 0.307 | 0.159 | 2.30E-158 | Treg | Ergic1   |
| 6.96E-161 | 0.34371185  | 0.259 | 0.117 | 1.12E-156 | Treg | Fam46c   |
| 1.97E-160 | 0.377113734 | 0.364 | 0.204 | 3.16E-156 | Treg | Ubash3b  |
| 2.05E-160 | 0.357865633 | 0.272 | 0.132 | 3.29E-156 | Treg | Mmd      |
| 7.11E-159 | 0.368342266 | 0.281 | 0.136 | 1.14E-154 | Treg | Rrad     |
| 1.59E-158 | 0.35596159  | 0.501 | 0.339 | 2.54E-154 | Treg | Pigx     |
| 1.23E-155 | 0.392332926 | 0.501 | 0.342 | 1.97E-151 | Treg | Tspan13  |
| 1.51E-155 | 0.359585784 | 0.638 | 0.5   | 2.42E-151 | Treg | Grap     |
| 1.16E-153 | 0.637801948 | 0.263 | 0.124 | 1.86E-149 | Treg | Nr4a1    |
| 1.72E-153 | 0.37355717  | 0.588 | 0.439 | 2.76E-149 | Treg | Rbm38    |
| 2.96E-153 | 0.25499351  | 0.884 | 0.84  | 4.75E-149 | Treg | Gng5     |
| 8.70E-151 | 0.324396477 | 0.718 | 0.612 | 1.39E-146 | Treg | Map1lc3b |
| 1.24E-150 | 0.365466181 | 0.345 | 0.195 | 1.98E-146 | Treg | Vcpkmt   |
| 8.89E-150 | 0.370659635 | 0.551 | 0.399 | 1.42E-145 | Treg | Plp2     |
| 2.02E-148 | 0.346908713 | 0.299 | 0.156 | 3.23E-144 | Treg | Ii12rb1  |
| 1.67E-147 | 0.343096466 | 0.67  | 0.546 | 2.67E-143 | Treg | Bnip3l   |
| 5.15E-146 | 0.32416559  | 0.311 | 0.163 | 8.25E-142 | Treg | Csrnp1   |
| 7.79E-145 | 0.312287569 | 0.913 | 0.877 | 1.25E-140 | Treg | H2-Q7    |
| 1.16E-143 | 0.342065198 | 0.3   | 0.159 | 1.86E-139 | Treg | Tank     |
| 1.20E-143 | 0.329229952 | 0.279 | 0.142 | 1.92E-139 | Treg | Stx11    |
| 2.22E-143 | 0.342214985 | 0.408 | 0.257 | 3.56E-139 | Treg | Map2k3   |
| 2.45E-142 | 0.338416971 | 0.602 | 0.465 | 3.93E-138 | Treg | Ptp4a2   |
| 2.74E-141 | 0.301396086 | 0.777 | 0.688 | 4.39E-137 | Treg | Cd53     |
| 2.91E-141 | 0.318697072 | 0.254 | 0.124 | 4.67E-137 | Treg | Rhoc     |
| 6.94E-141 | 0.342223912 | 0.557 | 0.412 | 1.11E-136 | Treg | Rps6ka1  |
| 9.33E-141 | 0.305760356 | 0.34  | 0.191 | 1.50E-136 | Treg | Lxn      |
| 5.43E-140 | 0.350981218 | 0.566 | 0.413 | 8.70E-136 | Treg | Gbp7     |
| 2.77E-139 | 0.290155471 | 0.739 | 0.641 | 4.43E-135 | Treg | Selenok  |
| 3.29E-139 | 0.335289331 | 0.377 | 0.224 | 5.27E-135 | Treg | Gata3    |
| 8.64E-139 | 0.311683863 | 0.287 | 0.149 | 1.38E-134 | Treg | Nmb      |
| 1.28E-138 | 0.302344896 | 0.298 | 0.155 | 2.05E-134 | Treg | Slamf1   |
| 1.61E-138 | 0.316425452 | 0.277 | 0.142 | 2.58E-134 | Treg | Grn      |
| 1.40E-137 | 0.360701238 | 0.643 | 0.514 | 2.25E-133 | Treg | Peli1    |
| 1.42E-137 | 0.329835062 | 0.526 | 0.37  | 2.28E-133 | Treg | Gna13    |

|           |             |       |       |           |      |         |
|-----------|-------------|-------|-------|-----------|------|---------|
| 4.27E-137 | 0.313877973 | 0.276 | 0.142 | 6.84E-133 | Treg | Dok1    |
| 2.75E-136 | 0.317789773 | 0.746 | 0.651 | 4.41E-132 | Treg | Sqstm1  |
| 1.34E-135 | 0.285469379 | 0.908 | 0.758 | 2.14E-131 | Treg | S100a6  |
| 1.34E-134 | 0.307757158 | 0.771 | 0.682 | 2.15E-130 | Treg | Ets1    |
| 3.92E-134 | 0.332163135 | 0.634 | 0.511 | 6.28E-130 | Treg | Pycard  |
| 1.03E-133 | 0.304133711 | 0.723 | 0.612 | 1.65E-129 | Treg | Tap2    |
| 6.54E-133 | 0.379610335 | 0.603 | 0.456 | 1.05E-128 | Treg | Igtp    |
| 2.53E-132 | 0.332293144 | 0.511 | 0.367 | 4.06E-128 | Treg | Ncf4    |
| 2.80E-132 | 0.288996313 | 0.746 | 0.647 | 4.49E-128 | Treg | Aup1    |
| 1.96E-131 | 0.367565345 | 0.458 | 0.315 | 3.14E-127 | Treg | Dnajc1  |
| 2.98E-130 | 0.29322837  | 0.252 | 0.125 | 4.77E-126 | Treg | Hbs1l   |
| 3.60E-129 | 0.291602227 | 0.778 | 0.699 | 5.78E-125 | Treg | Vasp    |
| 9.35E-129 | 0.301029298 | 0.848 | 0.793 | 1.50E-124 | Treg | Gimap3  |
| 1.03E-124 | 0.301469247 | 0.285 | 0.154 | 1.65E-120 | Treg | Ccs     |
| 1.16E-124 | 0.321539137 | 0.577 | 0.443 | 1.85E-120 | Treg | Cyth4   |
| 1.27E-123 | 0.337376501 | 0.628 | 0.504 | 2.04E-119 | Treg | Pld3    |
| 8.86E-121 | 0.32257482  | 0.599 | 0.477 | 1.42E-116 | Treg | Mtdh    |
| 6.31E-120 | 0.317007589 | 0.305 | 0.174 | 1.01E-115 | Treg | Entpd1  |
| 7.87E-120 | 0.312203189 | 0.569 | 0.441 | 1.26E-115 | Treg | Anxa11  |
| 2.70E-119 | 0.26385688  | 0.679 | 0.57  | 4.33E-115 | Treg | Gpx1    |
| 8.31E-119 | 0.344020064 | 0.393 | 0.251 | 1.33E-114 | Treg | Nr3c1   |
| 5.94E-118 | 0.264065535 | 0.799 | 0.727 | 9.52E-114 | Treg | Prkar1a |
| 5.93E-117 | 0.293954125 | 0.719 | 0.606 | 9.50E-113 | Treg | Trac    |
| 2.07E-116 | 0.320503795 | 0.278 | 0.153 | 3.32E-112 | Treg | P4ha1   |
| 4.21E-116 | 0.329024981 | 0.458 | 0.322 | 6.75E-112 | Treg | Cast    |
| 7.23E-116 | 0.296415364 | 0.251 | 0.131 | 1.16E-111 | Treg | Birc3   |
| 6.09E-113 | 0.265001571 | 0.802 | 0.738 | 9.77E-109 | Treg | Anp32a  |
| 1.24E-111 | 0.267787113 | 0.866 | 0.834 | 1.98E-107 | Treg | Gimap4  |
| 6.67E-109 | 0.297293444 | 0.622 | 0.512 | 1.07E-104 | Treg | Fermt3  |
| 6.74E-109 | 0.313358505 | 0.276 | 0.156 | 1.08E-104 | Treg | Syt11   |
| 1.90E-108 | 0.346190722 | 0.541 | 0.423 | 3.04E-104 | Treg | Gstp3   |
| 4.87E-108 | 0.315997863 | 0.523 | 0.397 | 7.81E-104 | Treg | Serp1   |
| 7.85E-108 | 0.286858236 | 0.652 | 0.541 | 1.26E-103 | Treg | Fmnl1   |
| 5.09E-107 | 0.305484996 | 0.593 | 0.478 | 8.16E-103 | Treg | Ctsa    |
| 5.58E-107 | 0.290133829 | 0.271 | 0.151 | 8.95E-103 | Treg | Rara    |
| 1.86E-104 | 0.294734429 | 0.639 | 0.52  | 2.98E-100 | Treg | Ccnd2   |
| 1.00E-103 | 0.2817557   | 0.742 | 0.649 | 1.61E-99  | Treg | Arf6    |
| 2.41E-103 | 0.332441599 | 0.38  | 0.255 | 3.86E-99  | Treg | Ciapi1  |
| 2.82E-103 | 0.317166516 | 0.565 | 0.447 | 4.52E-99  | Treg | Cst3    |

|           |             |       |       |          |      |           |
|-----------|-------------|-------|-------|----------|------|-----------|
| 3.06E-103 | 0.298736707 | 0.464 | 0.336 | 4.90E-99 | Treg | Pold4     |
| 5.85E-103 | 0.291350415 | 0.644 | 0.529 | 9.37E-99 | Treg | Tpm4      |
| 2.89E-102 | 0.292397555 | 0.432 | 0.309 | 4.63E-98 | Treg | BC004004  |
| 1.94E-101 | 0.275646092 | 0.601 | 0.486 | 3.11E-97 | Treg | Chmp2a    |
| 1.93E-100 | 0.320176285 | 0.418 | 0.293 | 3.09E-96 | Treg | Ehd1      |
| 2.55E-100 | 0.328724122 | 0.684 | 0.614 | 4.08E-96 | Treg | Mdh1      |
| 6.72E-100 | 0.304739205 | 0.581 | 0.467 | 1.08E-95 | Treg | Tgfb1     |
| 7.20E-99  | 0.38075978  | 0.631 | 0.534 | 1.15E-94 | Treg | Ubald2    |
| 1.26E-98  | 0.283324811 | 0.623 | 0.526 | 2.02E-94 | Treg | Csk       |
| 1.52E-98  | 0.273379947 | 0.638 | 0.533 | 2.44E-94 | Treg | Lcp2      |
| 2.12E-98  | 0.308195055 | 0.455 | 0.329 | 3.40E-94 | Treg | Tmem173   |
| 3.21E-98  | 0.311253815 | 0.365 | 0.242 | 5.15E-94 | Treg | Ap3b1     |
| 4.90E-97  | 0.28755494  | 0.569 | 0.454 | 7.85E-93 | Treg | Smpdl3a   |
| 1.53E-96  | 0.303156506 | 0.436 | 0.31  | 2.46E-92 | Treg | S1pr4     |
| 2.48E-95  | 0.315336714 | 0.392 | 0.269 | 3.98E-91 | Treg | Pfkl      |
| 4.07E-95  | 0.309924344 | 0.377 | 0.251 | 6.52E-91 | Treg | Orai1     |
| 4.59E-95  | 0.260010891 | 0.689 | 0.598 | 7.36E-91 | Treg | H13       |
| 5.85E-95  | 0.281720313 | 0.411 | 0.287 | 9.37E-91 | Treg | Fnbp1     |
| 7.66E-95  | 0.28742938  | 0.337 | 0.218 | 1.23E-90 | Treg | Mthfsl    |
| 3.53E-94  | 0.306273191 | 0.427 | 0.305 | 5.66E-90 | Treg | Rabgap1l  |
| 5.10E-94  | 0.275837388 | 0.575 | 0.461 | 8.17E-90 | Treg | Aes       |
| 7.44E-94  | 0.276792992 | 0.585 | 0.48  | 1.19E-89 | Treg | Ppdpf     |
| 1.08E-92  | 0.271126158 | 0.656 | 0.558 | 1.74E-88 | Treg | Rbms1     |
| 1.26E-92  | 0.279291632 | 0.377 | 0.253 | 2.02E-88 | Treg | Arhgap4   |
| 2.54E-92  | 0.256235836 | 0.69  | 0.605 | 4.08E-88 | Treg | Pla2g16   |
| 3.01E-92  | 0.296069494 | 0.778 | 0.698 | 4.83E-88 | Treg | Stat1     |
| 7.13E-92  | 0.277338581 | 0.748 | 0.686 | 1.14E-87 | Treg | Eno1      |
| 3.51E-91  | 0.261137723 | 0.294 | 0.18  | 5.63E-87 | Treg | Fbxo6     |
| 3.55E-91  | 0.401711435 | 0.517 | 0.402 | 5.69E-87 | Treg | Serpina3g |
| 4.31E-90  | 0.258046608 | 0.288 | 0.175 | 6.91E-86 | Treg | Phyh      |
| 3.15E-89  | 0.276682677 | 0.366 | 0.247 | 5.05E-85 | Treg | Capn2     |
| 3.04E-88  | 0.374064535 | 0.306 | 0.197 | 4.88E-84 | Treg | Slc2a1    |
| 3.30E-88  | 0.262600694 | 0.642 | 0.547 | 5.30E-84 | Treg | Ube2b     |
| 1.43E-86  | 0.292739069 | 0.27  | 0.165 | 2.29E-82 | Treg | Fdft1     |
| 1.63E-86  | 0.254825919 | 0.413 | 0.289 | 2.61E-82 | Treg | Rcsd1     |
| 2.50E-86  | 0.290051073 | 0.458 | 0.344 | 4.01E-82 | Treg | Rab11a    |
| 4.23E-86  | 0.278665893 | 0.453 | 0.33  | 6.79E-82 | Treg | Inpp4b    |
| 3.80E-85  | 0.257965049 | 0.341 | 0.224 | 6.09E-81 | Treg | Cers4     |
| 2.88E-84  | 0.267757177 | 0.521 | 0.408 | 4.61E-80 | Treg | Slc50a1   |

|           |             |       |       |           |      |          |
|-----------|-------------|-------|-------|-----------|------|----------|
| 2.41E-83  | 0.273224893 | 0.58  | 0.484 | 3.86E-79  | Treg | Lamtor4  |
| 3.70E-83  | 0.317923624 | 0.584 | 0.481 | 5.93E-79  | Treg | Stat3    |
| 8.81E-82  | 0.338500936 | 0.37  | 0.26  | 1.41E-77  | Treg | Ccr5     |
| 1.13E-81  | 0.261341851 | 0.272 | 0.167 | 1.82E-77  | Treg | Srebf2   |
| 1.77E-81  | 0.2610546   | 0.512 | 0.389 | 2.84E-77  | Treg | S100a4   |
| 3.57E-81  | 0.271783656 | 0.451 | 0.339 | 5.72E-77  | Treg | Cdipt    |
| 8.09E-80  | 0.276765562 | 0.501 | 0.391 | 1.30E-75  | Treg | Kdelr1   |
| 1.92E-79  | 0.310052423 | 0.457 | 0.35  | 3.07E-75  | Treg | Batf     |
| 2.15E-76  | 0.28393303  | 0.393 | 0.288 | 3.45E-72  | Treg | Vmp1     |
| 7.16E-76  | 0.272300496 | 0.394 | 0.281 | 1.15E-71  | Treg | Cdkn1b   |
| 1.08E-75  | 0.25277604  | 0.335 | 0.225 | 1.73E-71  | Treg | Tnip1    |
| 9.33E-75  | 0.250542377 | 0.68  | 0.598 | 1.49E-70  | Treg | Ppp1r12a |
| 6.74E-74  | 0.256555764 | 0.459 | 0.35  | 1.08E-69  | Treg | Al467606 |
| 1.33E-73  | 0.268116005 | 0.7   | 0.624 | 2.13E-69  | Treg | Pgam1    |
| 4.38E-71  | 0.265273374 | 0.274 | 0.177 | 7.02E-67  | Treg | Pgm2     |
| 1.84E-62  | 0.267153055 | 0.479 | 0.378 | 2.95E-58  | Treg | Tsc22d3  |
| 3.09E-60  | 0.288274508 | 0.427 | 0.334 | 4.95E-56  | Treg | Hopx     |
| 2.44E-59  | 0.26211644  | 0.405 | 0.313 | 3.91E-55  | Treg | Camk4    |
| 2.53E-59  | 0.327542814 | 0.348 | 0.255 | 4.06E-55  | Treg | Icam1    |
| 4.00E-59  | 0.250611087 | 0.665 | 0.596 | 6.42E-55  | Treg | H2-Q6    |
| 1.53E-36  | 0.303742685 | 0.292 | 0.223 | 2.46E-32  | Treg | Irf8     |
| 0         | 0.938869125 | 0.334 | 0.037 | 0         | Cd4  | Cd40lg   |
| 0         | 0.660866741 | 0.455 | 0.204 | 0         | Cd4  | Cd4      |
| 2.06E-252 | 0.726875916 | 0.578 | 0.382 | 3.31E-248 | Cd4  | Irgb1    |
| 4.85E-136 | 0.655863372 | 0.125 | 0.317 | 7.77E-132 | Cd4  | Ccl4     |
| 7.75E-121 | 0.425489386 | 0.911 | 0.888 | 1.24E-116 | Cd4  | Junb     |
| 9.13E-111 | 0.37868225  | 0.75  | 0.727 | 1.46E-106 | Cd4  | Slfn2    |
| 2.40E-110 | 0.514369816 | 0.488 | 0.371 | 3.84E-106 | Cd4  | Btg2     |
| 5.58E-105 | 0.454296526 | 0.574 | 0.455 | 8.94E-101 | Cd4  | Emb      |
| 5.14E-75  | 0.403632611 | 0.271 | 0.17  | 8.24E-71  | Cd4  | S1pr1    |
| 3.15E-57  | 0.422136118 | 0.559 | 0.515 | 5.05E-53  | Cd4  | Slfn1    |
| 3.20E-57  | 0.328023563 | 0.516 | 0.45  | 5.14E-53  | Cd4  | Cd28     |
| 3.16E-56  | 0.345620632 | 0.967 | 0.972 | 5.07E-52  | Cd4  | Malat1   |
| 1.34E-54  | 0.35114243  | 0.286 | 0.202 | 2.15E-50  | Cd4  | Il18r1   |
| 8.30E-54  | 0.288623359 | 0.301 | 0.204 | 1.33E-49  | Cd4  | Tcf7     |
| 8.05E-45  | 0.354085908 | 0.303 | 0.229 | 1.29E-40  | Cd4  | Gpr183   |
| 4.27E-42  | 0.413260902 | 0.432 | 0.359 | 6.84E-38  | Cd4  | Il7r     |
| 2.25E-36  | 0.301108467 | 0.995 | 0.998 | 3.61E-32  | Cd4  | Gm42418  |
| 1.20E-35  | 0.34273906  | 0.6   | 0.588 | 1.92E-31  | Cd4  | Ier2     |

|             |             |       |       |             |           |          |
|-------------|-------------|-------|-------|-------------|-----------|----------|
| 1.05E-34    | 0.309030498 | 0.353 | 0.276 | 1.68E-30    | Cd4       | Klf2     |
| 1.39E-33    | 0.450694791 | 0.48  | 0.429 | 2.23E-29    | Cd4       | Fos      |
| 2.13E-31    | 0.323996394 | 0.433 | 0.387 | 3.41E-27    | Cd4       | Ier5     |
| 1.22E-29    | 0.258026543 | 0.279 | 0.219 | 1.96E-25    | Cd4       | Tespa1   |
| 4.22E-29    | 0.288609349 | 0.299 | 0.244 | 6.77E-25    | Cd4       | Gpr132   |
| 1.05E-23    | 0.280920437 | 0.267 | 0.216 | 1.69E-19    | Cd4       | Gm26740  |
| 2.68E-20    | 0.354871772 | 0.588 | 0.598 | 4.29E-16    | Cd4       | Zfp36l2  |
| 1.34E-18    | 0.37260609  | 0.266 | 0.223 | 2.15E-14    | Cd4       | Socs3    |
| 2.55E-18    | 0.303997028 | 0.308 | 0.277 | 4.08E-14    | Cd4       | Arid5a   |
| 2.22E-16    | 0.252561882 | 0.391 | 0.37  | 3.56E-12    | Cd4       | Rexo2    |
| 9.61E-16    | 0.283289501 | 0.323 | 0.297 | 1.54E-11    | Cd4       | Tgfbr2   |
| 1.52E-15    | 0.355884018 | 0.357 | 0.329 | 2.43E-11    | Cd4       | Tnfaip3  |
| 6.20E-15    | 0.283338078 | 0.44  | 0.425 | 9.94E-11    | Cd4       | Bhlhe40  |
| 2.63E-14    | 0.274913298 | 0.279 | 0.247 | 4.21E-10    | Cd4       | Itga4    |
| 2.50E-08    | 0.277130841 | 0.748 | 0.785 | 0.00040124  | Cd4       | Lars2    |
| 4.28E-06    | 0.25789865  | 0.547 | 0.576 | 0.068626275 | Cd4       | Klf6     |
| 4.34E-06    | 0.408152589 | 0.486 | 0.505 | 0.069498257 | Cd4       | AY036118 |
| 0.000512492 | 0.812815273 | 0.421 | 0.487 | 1           | Cd4       | Gm26917  |
| 0.000667407 | 0.282066922 | 0.265 | 0.257 | 1           | Cd4       | Ifit3    |
| 0.005254458 | 0.252582367 | 0.275 | 0.273 | 1           | Cd4       | Ifit1    |
| 0           | 1.021282745 | 0.642 | 0.114 | 0           | Cd8 Naive | Sell     |
| 0           | 0.981714755 | 0.734 | 0.281 | 0           | Cd8 Naive | Bcl2     |
| 0           | 0.891765631 | 0.445 | 0.073 | 0           | Cd8 Naive | Ccr7     |
| 0           | 0.878577377 | 0.65  | 0.168 | 0           | Cd8 Naive | Tcf7     |
| 0           | 0.863824638 | 0.679 | 0.241 | 0           | Cd8 Naive | Klf2     |
| 0           | 0.80467316  | 0.613 | 0.242 | 0           | Cd8 Naive | Cd7      |
| 0           | 0.78922348  | 0.538 | 0.136 | 0           | Cd8 Naive | Satb1    |
| 0           | 0.747705117 | 0.471 | 0.157 | 0           | Cd8 Naive | Pim2     |
| 0           | 0.734702095 | 0.993 | 0.913 | 0           | Cd8 Naive | Rpl36a   |
| 0           | 0.72029824  | 0.254 | 0.038 | 0           | Cd8 Naive | Dapl1    |
| 0           | 0.708213439 | 1     | 0.99  | 0           | Cd8 Naive | Rps20    |
| 0           | 0.69373513  | 0.521 | 0.178 | 0           | Cd8 Naive | Lef1     |
| 0           | 0.684405108 | 0.999 | 0.992 | 0           | Cd8 Naive | Rplp1    |
| 0           | 0.670976345 | 0.373 | 0.053 | 0           | Cd8 Naive | Nsg2     |
| 0           | 0.668774696 | 1     | 0.995 | 0           | Cd8 Naive | Rps24    |
| 0           | 0.655327044 | 0.949 | 0.763 | 0           | Cd8 Naive | mt-Nd2   |
| 0           | 0.652834981 | 0.995 | 0.946 | 0           | Cd8 Naive | Rps28    |
| 0           | 0.652344251 | 1     | 0.987 | 0           | Cd8 Naive | Rps19    |
| 0           | 0.648039254 | 0.995 | 0.958 | 0           | Cd8 Naive | Rps29    |

|   |             |       |       |   |           |         |
|---|-------------|-------|-------|---|-----------|---------|
| 0 | 0.638641031 | 0.993 | 0.954 | 0 | Cd8 Naive | Rpl12   |
| 0 | 0.622497285 | 1     | 0.997 | 0 | Cd8 Naive | Rpl13   |
| 0 | 0.618949512 | 0.998 | 0.972 | 0 | Cd8 Naive | Rps7    |
| 0 | 0.604042623 | 1     | 0.987 | 0 | Cd8 Naive | Rpl8    |
| 0 | 0.602860422 | 0.451 | 0.152 | 0 | Cd8 Naive | Txk     |
| 0 | 0.594625963 | 1     | 0.996 | 0 | Cd8 Naive | Rps16   |
| 0 | 0.588289239 | 1     | 0.979 | 0 | Cd8 Naive | Rps21   |
| 0 | 0.588272914 | 0.999 | 0.966 | 0 | Cd8 Naive | Rps18   |
| 0 | 0.58816456  | 0.998 | 0.982 | 0 | Cd8 Naive | Rps27   |
| 0 | 0.581688151 | 0.982 | 0.889 | 0 | Cd8 Naive | mt-Nd4l |
| 0 | 0.57476901  | 1     | 0.993 | 0 | Cd8 Naive | Rps5    |
| 0 | 0.570223503 | 0.974 | 0.859 | 0 | Cd8 Naive | mt-Nd1  |
| 0 | 0.56892993  | 0.871 | 0.639 | 0 | Cd8 Naive | mt-Nd5  |
| 0 | 0.562374274 | 1     | 0.986 | 0 | Cd8 Naive | Rpl35a  |
| 0 | 0.559406317 | 1     | 0.993 | 0 | Cd8 Naive | Rpl23   |
| 0 | 0.556610324 | 1     | 0.992 | 0 | Cd8 Naive | Rps4x   |
| 0 | 0.555415647 | 1     | 0.993 | 0 | Cd8 Naive | Rps8    |
| 0 | 0.551376446 | 0.986 | 0.908 | 0 | Cd8 Naive | Rpl5    |
| 0 | 0.550568708 | 1     | 0.991 | 0 | Cd8 Naive | Rpl21   |
| 0 | 0.549767789 | 1     | 0.991 | 0 | Cd8 Naive | Rps27a  |
| 0 | 0.549328766 | 0.99  | 0.932 | 0 | Cd8 Naive | Eef1b2  |
| 0 | 0.539473373 | 1     | 0.991 | 0 | Cd8 Naive | Rps3a1  |
| 0 | 0.534058488 | 0.997 | 0.95  | 0 | Cd8 Naive | Rpl35   |
| 0 | 0.512736533 | 0.997 | 0.972 | 0 | Cd8 Naive | Rpl10a  |
| 0 | 0.504174741 | 0.996 | 0.954 | 0 | Cd8 Naive | Rpl10   |
| 0 | 0.494244451 | 0.29  | 0.067 | 0 | Cd8 Naive | Sh3bp5  |
| 0 | 0.493862317 | 1     | 0.992 | 0 | Cd8 Naive | Rps10   |
| 0 | 0.493800229 | 0.998 | 0.975 | 0 | Cd8 Naive | Rpl15   |
| 0 | 0.486994327 | 1     | 0.987 | 0 | Cd8 Naive | Rps9    |
| 0 | 0.485409919 | 1     | 0.993 | 0 | Cd8 Naive | Rpl9    |
| 0 | 0.482284718 | 0.999 | 0.983 | 0 | Cd8 Naive | Rps23   |
| 0 | 0.479543748 | 0.993 | 0.95  | 0 | Cd8 Naive | Rps6    |
| 0 | 0.475746134 | 0.97  | 0.87  | 0 | Cd8 Naive | Npm1    |
| 0 | 0.473521574 | 0.999 | 0.979 | 0 | Cd8 Naive | Rpl3    |
| 0 | 0.469334354 | 1     | 0.987 | 0 | Cd8 Naive | mt-Atp6 |
| 0 | 0.468704311 | 1     | 0.992 | 0 | Cd8 Naive | Rpl30   |
| 0 | 0.465381239 | 1     | 0.993 | 0 | Cd8 Naive | Rpl32   |
| 0 | 0.464267893 | 0.995 | 0.975 | 0 | Cd8 Naive | Rps12   |
| 0 | 0.461020804 | 1     | 0.992 | 0 | Cd8 Naive | Rps3    |



|           |             |       |       |           |           |         |
|-----------|-------------|-------|-------|-----------|-----------|---------|
| 0         | 0.460856953 | 0.991 | 0.942 | 0         | Cd8 Naive | Rack1   |
| 0         | 0.45801518  | 0.999 | 0.981 | 0         | Cd8 Naive | Rplp2   |
| 0         | 0.457797746 | 1     | 0.989 | 0         | Cd8 Naive | Rps2    |
| 0         | 0.457787741 | 0.999 | 0.987 | 0         | Cd8 Naive | Rpl36   |
| 0         | 0.452791656 | 1     | 0.993 | 0         | Cd8 Naive | Rpl27a  |
| 0         | 0.451739276 | 0.996 | 0.969 | 0         | Cd8 Naive | Rpl14   |
| 0         | 0.449618282 | 0.997 | 0.978 | 0         | Cd8 Naive | Rpl26   |
| 0         | 0.449580177 | 1     | 0.987 | 0         | Cd8 Naive | Rpl39   |
| 0         | 0.442194947 | 1     | 0.995 | 0         | Cd8 Naive | Rpl18a  |
| 0         | 0.437236444 | 1     | 0.991 | 0         | Cd8 Naive | Rpl37a  |
| 0         | 0.430330484 | 1     | 0.991 | 0         | Cd8 Naive | Rpl37   |
| 0         | 0.420170714 | 1     | 0.986 | 0         | Cd8 Naive | Rps26   |
| 0         | 0.419685876 | 0.998 | 0.976 | 0         | Cd8 Naive | mt-Co3  |
| 0         | 0.418564168 | 1     | 0.993 | 0         | Cd8 Naive | Rpl17   |
| 0         | 0.4184494   | 1     | 0.988 | 0         | Cd8 Naive | Rpl6    |
| 0         | 0.417219056 | 0.999 | 0.98  | 0         | Cd8 Naive | Rpl28   |
| 0         | 0.416702369 | 0.984 | 0.927 | 0         | Cd8 Naive | Rpl4    |
| 0         | 0.415164363 | 1     | 0.994 | 0         | Cd8 Naive | Rpl18   |
| 0         | 0.41086967  | 1     | 0.997 | 0         | Cd8 Naive | Rpsa    |
| 0         | 0.406940835 | 0.996 | 0.97  | 0         | Cd8 Naive | Rpl7    |
| 0         | 0.400616383 | 1     | 0.988 | 0         | Cd8 Naive | Rps14   |
| 0         | 0.389049154 | 1     | 0.994 | 0         | Cd8 Naive | Rplp0   |
| 0         | 0.386957304 | 1     | 0.996 | 0         | Cd8 Naive | Rpl19   |
| 0         | 0.378554216 | 1     | 0.993 | 0         | Cd8 Naive | Rps13   |
| 0         | 0.373310573 | 1     | 0.993 | 0         | Cd8 Naive | Rps11   |
| 0         | 0.372365998 | 0.997 | 0.974 | 0         | Cd8 Naive | Rpl38   |
| 0         | 0.359558755 | 1     | 0.995 | 0         | Cd8 Naive | Rps15a  |
| 0         | 0.358250925 | 0.996 | 0.973 | 0         | Cd8 Naive | Rpl22   |
| 0         | 0.356801383 | 0.999 | 0.994 | 0         | Cd8 Naive | mt-Co1  |
| 0         | 0.345690602 | 1     | 0.992 | 0         | Cd8 Naive | Rpl11   |
| 0         | 0.345421497 | 1     | 0.992 | 0         | Cd8 Naive | Rpl34   |
| 0         | 0.338612626 | 1     | 0.995 | 0         | Cd8 Naive | Tpt1    |
| 0         | 0.33836013  | 0.997 | 0.986 | 0         | Cd8 Naive | mt-Co2  |
| 0         | 0.334990497 | 1     | 0.997 | 0         | Cd8 Naive | Eef1a1  |
| 0         | 0.329954092 | 0.999 | 0.984 | 0         | Cd8 Naive | Rpl29   |
| 0         | 0.275972702 | 1     | 0.995 | 0         | Cd8 Naive | Rpl41   |
| 8.80E-307 | 0.408500586 | 0.993 | 0.935 | 1.41E-302 | Cd8 Naive | mt-Cytb |
| 4.02E-276 | 0.542352695 | 0.497 | 0.197 | 6.44E-272 | Cd8 Naive | Socs3   |
| 2.50E-273 | 0.509865962 | 0.318 | 0.088 | 4.01E-269 | Cd8 Naive | Klf3    |

|           |             |       |       |           |           |         |
|-----------|-------------|-------|-------|-----------|-----------|---------|
| 4.21E-261 | 0.545441095 | 0.622 | 0.318 | 6.75E-257 | Cd8 Naive | Evl     |
| 1.55E-252 | 0.538738672 | 0.5   | 0.221 | 2.48E-248 | Cd8 Naive | Foxp1   |
| 6.28E-244 | 0.390453691 | 0.954 | 0.862 | 1.01E-239 | Cd8 Naive | Rpl23a  |
| 9.78E-242 | 0.470923054 | 0.87  | 0.686 | 1.57E-237 | Cd8 Naive | mt-Nd4  |
| 1.83E-241 | 0.494550341 | 0.324 | 0.105 | 2.93E-237 | Cd8 Naive | Actn1   |
| 7.74E-236 | 0.449012718 | 0.806 | 0.447 | 1.24E-231 | Cd8 Naive | Ly6c2   |
| 1.30E-229 | 0.477546198 | 0.466 | 0.2   | 2.08E-225 | Cd8 Naive | Hmgn1   |
| 2.42E-229 | 0.399851082 | 0.939 | 0.836 | 3.88E-225 | Cd8 Naive | Rps25   |
| 6.07E-228 | 0.472291087 | 0.752 | 0.444 | 9.72E-224 | Cd8 Naive | Emb     |
| 8.51E-227 | 0.424113532 | 0.935 | 0.829 | 1.36E-222 | Cd8 Naive | Rpl22l1 |
| 1.45E-223 | 0.501353537 | 0.339 | 0.118 | 2.32E-219 | Cd8 Naive | Sidt1   |
| 8.59E-218 | 0.370825365 | 0.959 | 0.88  | 1.38E-213 | Cd8 Naive | Rps15   |
| 1.69E-214 | 0.415573317 | 0.349 | 0.124 | 2.71E-210 | Cd8 Naive | Gm2682  |
| 8.90E-201 | 0.432952496 | 0.389 | 0.158 | 1.43E-196 | Cd8 Naive | Pdlim1  |
| 1.49E-187 | 0.412501544 | 0.841 | 0.698 | 2.39E-183 | Cd8 Naive | Eef1g   |
| 6.23E-175 | 0.52364484  | 0.338 | 0.141 | 9.99E-171 | Cd8 Naive | Klhdc2  |
| 2.03E-169 | 0.347144071 | 0.655 | 0.353 | 3.26E-165 | Cd8 Naive | Klrd1   |
| 4.01E-167 | 0.430794802 | 0.483 | 0.25  | 6.42E-163 | Cd8 Naive | Arl4c   |
| 5.04E-165 | 0.424567229 | 0.45  | 0.221 | 8.08E-161 | Cd8 Naive | Gramd3  |
| 1.43E-147 | 0.370996975 | 0.391 | 0.181 | 2.29E-143 | Cd8 Naive | Ssh2    |
| 8.53E-147 | 0.401982962 | 0.682 | 0.486 | 1.37E-142 | Cd8 Naive | Nop10   |
| 1.04E-140 | 0.346542747 | 0.853 | 0.689 | 1.66E-136 | Cd8 Naive | mt-Atp8 |
| 5.70E-136 | 0.412571339 | 0.547 | 0.338 | 9.14E-132 | Cd8 Naive | Acp5    |
| 1.21E-135 | 0.427316233 | 0.321 | 0.143 | 1.94E-131 | Cd8 Naive | Myc     |
| 1.04E-129 | 0.310009325 | 0.888 | 0.788 | 1.67E-125 | Cd8 Naive | Rpl31   |
| 7.75E-128 | 0.348188597 | 0.312 | 0.138 | 1.24E-123 | Cd8 Naive | Il4ra   |
| 4.00E-122 | 0.350117059 | 0.672 | 0.476 | 6.41E-118 | Cd8 Naive | Dnajc15 |
| 1.37E-120 | 0.333109408 | 0.356 | 0.169 | 2.20E-116 | Cd8 Naive | S1pr1   |
| 3.18E-111 | 0.365147777 | 0.493 | 0.306 | 5.10E-107 | Cd8 Naive | Rps27rt |
| 9.88E-111 | 0.285689206 | 0.752 | 0.592 | 1.58E-106 | Cd8 Naive | Hspe1   |
| 1.63E-110 | 0.391587074 | 0.592 | 0.407 | 2.61E-106 | Cd8 Naive | Ablim1  |
| 3.19E-110 | 0.379469568 | 0.517 | 0.34  | 5.11E-106 | Cd8 Naive | Gm10073 |
| 4.48E-110 | 0.38748294  | 0.52  | 0.337 | 7.18E-106 | Cd8 Naive | mt-Nd3  |
| 1.39E-107 | 0.34540539  | 0.487 | 0.3   | 2.22E-103 | Cd8 Naive | Fbl     |
| 1.73E-107 | 0.353776182 | 0.493 | 0.312 | 2.77E-103 | Cd8 Naive | Mrpl23  |
| 1.68E-105 | 0.339622184 | 0.324 | 0.163 | 2.70E-101 | Cd8 Naive | Snhg12  |
| 7.37E-103 | 0.284815765 | 0.868 | 0.759 | 1.18E-98  | Cd8 Naive | Rps17   |
| 2.64E-102 | 0.428225518 | 0.426 | 0.247 | 4.23E-98  | Cd8 Naive | Jun     |
| 9.92E-102 | 0.356765641 | 0.5   | 0.319 | 1.59E-97  | Cd8 Naive | Fam189b |

|           |             |       |       |          |           |            |
|-----------|-------------|-------|-------|----------|-----------|------------|
| 1.24E-101 | 0.35378324  | 0.505 | 0.33  | 1.99E-97 | Cd8 Naive | Gm9493     |
| 3.13E-99  | 0.26965513  | 0.364 | 0.187 | 5.02E-95 | Cd8 Naive | Ms4a4c     |
| 9.53E-99  | 0.313103168 | 0.313 | 0.158 | 1.53E-94 | Cd8 Naive | Epb41l4aos |
| 2.13E-96  | 0.335598443 | 0.437 | 0.268 | 3.42E-92 | Cd8 Naive | Impdh2     |
| 8.56E-95  | 0.289957885 | 0.308 | 0.153 | 1.37E-90 | Cd8 Naive | Ripor2     |
| 6.32E-88  | 0.269514225 | 0.554 | 0.35  | 1.01E-83 | Cd8 Naive | Il7r       |
| 6.37E-87  | 0.31330931  | 0.391 | 0.23  | 1.02E-82 | Cd8 Naive | Atp11b     |
| 1.32E-86  | 0.274322183 | 0.318 | 0.167 | 2.12E-82 | Cd8 Naive | Bzw2       |
| 1.86E-85  | 0.386990114 | 0.567 | 0.404 | 2.99E-81 | Cd8 Naive | Vps37b     |
| 1.93E-85  | 0.309944026 | 0.35  | 0.196 | 3.09E-81 | Cd8 Naive | Klhl6      |
| 4.65E-84  | 0.273562199 | 0.294 | 0.15  | 7.45E-80 | Cd8 Naive | Gpr18      |
| 1.03E-81  | 0.299217632 | 0.653 | 0.516 | 1.65E-77 | Cd8 Naive | Gm11808    |
| 3.00E-81  | 0.32916365  | 0.513 | 0.358 | 4.80E-77 | Cd8 Naive | Klk8       |
| 7.99E-79  | 0.341019013 | 0.708 | 0.575 | 1.28E-74 | Cd8 Naive | Ier2       |
| 1.24E-76  | 0.251274127 | 0.794 | 0.673 | 1.99E-72 | Cd8 Naive | Trmt112    |
| 1.61E-74  | 0.285036261 | 0.453 | 0.299 | 2.58E-70 | Cd8 Naive | C1qbp      |
| 1.05E-69  | 0.282285482 | 0.592 | 0.445 | 1.68E-65 | Cd8 Naive | Rapegef6   |
| 5.62E-69  | 0.284242248 | 0.355 | 0.218 | 9.01E-65 | Cd8 Naive | AB124611   |
| 5.14E-67  | 0.309831627 | 0.575 | 0.422 | 8.24E-63 | Cd8 Naive | Fos        |
| 1.13E-60  | 0.280658854 | 0.375 | 0.244 | 1.81E-56 | Cd8 Naive | Pik3cd     |
| 2.30E-55  | 0.252972129 | 0.521 | 0.392 | 3.68E-51 | Cd8 Naive | Npm3       |
| 3.08E-53  | 0.252713463 | 0.374 | 0.251 | 4.93E-49 | Cd8 Naive | H2-Ke6     |
| 0         | 3.513173327 | 0.938 | 0.003 | 0        | Tgd       | Trdv4      |
| 0         | 3.394776238 | 0.629 | 0.003 | 0        | Tgd       | Il17a      |
| 0         | 2.463409127 | 0.888 | 0.006 | 0        | Tgd       | Cd163l1    |
| 0         | 2.29014726  | 0.902 | 0.039 | 0        | Tgd       | Tmem176b   |
| 0         | 2.118564265 | 0.83  | 0.003 | 0        | Tgd       | Tcrg-V6    |
| 0         | 2.111512486 | 0.88  | 0.076 | 0        | Tgd       | Ckb        |
| 0         | 2.041663035 | 0.854 | 0.029 | 0        | Tgd       | Tmem176a   |
| 0         | 1.764573771 | 0.83  | 0.048 | 0        | Tgd       | Ltb4r1     |
| 0         | 1.706521566 | 0.775 | 0.011 | 0        | Tgd       | Tcrg-C1    |
| 0         | 1.636529911 | 0.741 | 0.017 | 0        | Tgd       | Trdc       |
| 0         | 1.575909285 | 0.698 | 0.001 | 0        | Tgd       | Blk        |
| 0         | 1.563356592 | 0.791 | 0.068 | 0        | Tgd       | Actn2      |
| 0         | 1.44642845  | 0.67  | 0.055 | 0        | Tgd       | Serpinb1a  |
| 0         | 1.425752175 | 0.727 | 0.078 | 0        | Tgd       | Smox       |
| 0         | 1.425137034 | 0.795 | 0.195 | 0        | Tgd       | Selenop    |
| 0         | 1.412223529 | 0.859 | 0.207 | 0        | Tgd       | Ramp1      |
| 0         | 1.239568346 | 0.586 | 0.008 | 0        | Tgd       | Rorc       |

|           |             |       |       |           |     |               |
|-----------|-------------|-------|-------|-----------|-----|---------------|
| 0         | 1.17256074  | 0.571 | 0.003 | 0         | Tgd | Ppp1r14c      |
| 0         | 1.166333771 | 0.568 | 0.056 | 0         | Tgd | Furin         |
| 0         | 1.152404486 | 0.536 | 0.039 | 0         | Tgd | Avpi1         |
| 0         | 1.09112494  | 0.539 | 0.028 | 0         | Tgd | Aqp3          |
| 0         | 1.076921443 | 0.548 | 0.04  | 0         | Tgd | Ly6g5b        |
| 0         | 0.936882897 | 0.461 | 0.027 | 0         | Tgd | Tcrg-C4       |
| 0         | 0.911300607 | 0.441 | 0.003 | 0         | Tgd | Zbtb16        |
| 0         | 0.806051873 | 0.348 | 0     | 0         | Tgd | Abi3bp        |
| 0         | 0.786547079 | 0.382 | 0.015 | 0         | Tgd | Slc6a13       |
| 0         | 0.785531597 | 0.459 | 0.048 | 0         | Tgd | Tnfrsf25      |
| 0         | 0.677615103 | 0.318 | 0.001 | 0         | Tgd | Prr29         |
| 0         | 0.635114276 | 0.311 | 0.007 | 0         | Tgd | Lrrc25        |
| 0         | 0.632047642 | 0.305 | 0.005 | 0         | Tgd | Irak3         |
| 0         | 0.610495914 | 0.305 | 0     | 0         | Tgd | Sox13         |
| 0         | 0.594598627 | 0.298 | 0.005 | 0         | Tgd | 1700012B07Rik |
| 0         | 0.583747051 | 0.279 | 0.002 | 0         | Tgd | Il1r1         |
| 0         | 0.571695266 | 0.262 | 0.001 | 0         | Tgd | Il23r         |
| 0         | 0.55657366  | 0.282 | 0.021 | 0         | Tgd | Rasa4         |
| 0         | 0.546820934 | 0.259 | 0.001 | 0         | Tgd | Bcl2a1a       |
| 0         | 0.546299637 | 0.259 | 0.005 | 0         | Tgd | Il17re        |
| 0         | 0.531324752 | 0.275 | 0.004 | 0         | Tgd | Clnk          |
| 4.37E-258 | 1.060334997 | 0.491 | 0.082 | 7.01E-254 | Tgd | Naga          |
| 1.97E-254 | 1.328816441 | 0.986 | 0.518 | 3.15E-250 | Tgd | Cxcr6         |
| 5.75E-254 | 0.875329025 | 0.559 | 0.107 | 9.22E-250 | Tgd | Preli2        |
| 2.18E-229 | 0.909401981 | 0.577 | 0.127 | 3.50E-225 | Tgd | F2r           |
| 2.74E-217 | 0.552243051 | 0.257 | 0.025 | 4.38E-213 | Tgd | Lmo4          |
| 8.89E-192 | 1.219620676 | 0.946 | 0.589 | 1.42E-187 | Tgd | Gpx1          |
| 2.50E-187 | 0.794891531 | 0.998 | 0.961 | 4.01E-183 | Tgd | Itm2b         |
| 1.67E-177 | 0.754269758 | 0.482 | 0.108 | 2.68E-173 | Tgd | Plin2         |
| 1.00E-165 | 0.679825151 | 0.455 | 0.1   | 1.61E-161 | Tgd | Podnl1        |
| 9.27E-157 | 0.606722617 | 0.346 | 0.062 | 1.49E-152 | Tgd | Prrt1         |
| 2.81E-150 | 0.799248098 | 0.645 | 0.197 | 4.51E-146 | Tgd | Maf           |
| 8.38E-150 | 0.838956264 | 0.461 | 0.11  | 1.34E-145 | Tgd | Tnf           |
| 1.97E-146 | 0.800515989 | 0.988 | 0.611 | 3.15E-142 | Tgd | Capg          |
| 1.65E-138 | 0.709277754 | 0.366 | 0.072 | 2.65E-134 | Tgd | Rln3          |
| 2.73E-134 | 0.787641919 | 0.9   | 0.47  | 4.38E-130 | Tgd | Emb           |
| 2.05E-129 | 0.817339787 | 0.921 | 0.613 | 3.29E-125 | Tgd | Sec11c        |
| 5.85E-129 | 0.824266829 | 0.764 | 0.365 | 9.37E-125 | Tgd | Rexo2         |
| 9.67E-127 | 0.521924373 | 0.28  | 0.049 | 1.55E-122 | Tgd | Slc15a3       |

|           |             |       |       |           |     |            |
|-----------|-------------|-------|-------|-----------|-----|------------|
| 1.74E-124 | 0.669284758 | 0.393 | 0.095 | 2.79E-120 | Tgd | Serpina3f  |
| 1.61E-121 | 0.563560856 | 0.382 | 0.091 | 2.58E-117 | Tgd | Adgrg5     |
| 3.09E-121 | 0.48761438  | 0.3   | 0.058 | 4.95E-117 | Tgd | Myo1e      |
| 1.26E-112 | 0.657256297 | 0.439 | 0.124 | 2.02E-108 | Tgd | Znrf1      |
| 1.90E-112 | 0.675429786 | 0.97  | 0.809 | 3.04E-108 | Tgd | Tagln2     |
| 1.22E-111 | 0.419829256 | 0.286 | 0.056 | 1.95E-107 | Tgd | Selenom    |
| 2.41E-110 | 0.562554843 | 0.384 | 0.099 | 3.86E-106 | Tgd | Pik3ap1    |
| 2.86E-108 | 0.840451866 | 0.902 | 0.631 | 4.58E-104 | Tgd | Hsp90b1    |
| 1.67E-105 | 0.824012011 | 0.675 | 0.278 | 2.68E-101 | Tgd | Dgat1      |
| 3.47E-102 | 0.78937526  | 0.798 | 0.468 | 5.57E-98  | Tgd | Manf       |
| 1.08E-101 | 0.648593088 | 0.673 | 0.272 | 1.73E-97  | Tgd | Rora       |
| 4.44E-101 | 0.618213404 | 0.527 | 0.184 | 7.12E-97  | Tgd | Il12rb1    |
| 2.39E-100 | 0.664661122 | 0.995 | 0.859 | 3.83E-96  | Tgd | Ly6a       |
| 2.05E-99  | 0.710572443 | 0.479 | 0.157 | 3.28E-95  | Tgd | Ero1l      |
| 2.51E-98  | 0.658702408 | 0.484 | 0.163 | 4.03E-94  | Tgd | Adam8      |
| 2.05E-97  | 0.686209712 | 0.746 | 0.393 | 3.28E-93  | Tgd | Surf4      |
| 3.11E-94  | 0.551482149 | 0.971 | 0.858 | 4.99E-90  | Tgd | Tspo       |
| 6.48E-93  | 0.578482532 | 0.605 | 0.235 | 1.04E-88  | Tgd | Gpr183     |
| 6.65E-89  | 0.632808113 | 0.666 | 0.29  | 1.07E-84  | Tgd | Jaml       |
| 1.01E-88  | 0.347451736 | 0.998 | 0.987 | 1.62E-84  | Tgd | B2m        |
| 2.79E-88  | 0.523491312 | 0.305 | 0.076 | 4.47E-84  | Tgd | AC163354.1 |
| 7.12E-88  | 0.748630054 | 0.807 | 0.511 | 1.14E-83  | Tgd | Lgals3bp   |
| 6.06E-87  | 0.658949149 | 0.829 | 0.55  | 9.71E-83  | Tgd | Aprt       |
| 6.34E-87  | 0.453346274 | 0.289 | 0.068 | 1.02E-82  | Tgd | Tmem64     |
| 5.10E-86  | 0.555992309 | 0.798 | 0.399 | 8.18E-82  | Tgd | Ccr2       |
| 6.34E-86  | 0.69120079  | 0.761 | 0.431 | 1.02E-81  | Tgd | Dap        |
| 2.26E-85  | 0.680438716 | 0.516 | 0.185 | 3.62E-81  | Tgd | Trgv2      |
| 1.14E-81  | 0.447650904 | 0.27  | 0.065 | 1.83E-77  | Tgd | Scpep1     |
| 4.60E-81  | 0.55747425  | 0.986 | 0.889 | 7.37E-77  | Tgd | Lgals1     |
| 8.74E-76  | 0.605306281 | 0.996 | 0.945 | 1.40E-71  | Tgd | Srgn       |
| 7.21E-74  | 0.369554985 | 0.996 | 0.972 | 1.16E-69  | Tgd | Ly6e       |
| 1.03E-73  | 0.565014342 | 0.591 | 0.274 | 1.65E-69  | Tgd | Cd44       |
| 1.25E-73  | 0.472030919 | 0.95  | 0.794 | 2.00E-69  | Tgd | Cox5a      |
| 4.90E-73  | 0.484970249 | 0.984 | 0.838 | 7.86E-69  | Tgd | S100a11    |
| 3.05E-70  | 0.537828015 | 0.636 | 0.317 | 4.89E-66  | Tgd | Ap3s1      |
| 7.77E-70  | 0.537140338 | 0.977 | 0.893 | 1.25E-65  | Tgd | Ltb        |
| 8.86E-70  | 0.568336265 | 0.818 | 0.477 | 1.42E-65  | Tgd | Icos       |
| 1.28E-69  | 0.551940812 | 0.623 | 0.29  | 2.06E-65  | Tgd | Fgl2       |
| 1.27E-67  | 0.473209127 | 0.405 | 0.147 | 2.04E-63  | Tgd | Ppt2       |

|          |             |       |       |          |     |            |
|----------|-------------|-------|-------|----------|-----|------------|
| 5.26E-67 | 0.535991385 | 0.486 | 0.208 | 8.43E-63 | Tgd | Comt       |
| 3.10E-66 | 0.311249462 | 0.996 | 0.971 | 4.97E-62 | Tgd | Oaz1       |
| 4.20E-66 | 0.485896664 | 0.92  | 0.765 | 6.73E-62 | Tgd | Sec61g     |
| 4.50E-66 | 0.623919987 | 0.848 | 0.62  | 7.21E-62 | Tgd | Zap70      |
| 1.04E-65 | 0.569287419 | 0.616 | 0.312 | 1.67E-61 | Tgd | Snx2       |
| 6.04E-65 | 0.467797297 | 0.988 | 0.791 | 9.68E-61 | Tgd | S100a6     |
| 1.55E-64 | 0.468675649 | 0.943 | 0.824 | 2.48E-60 | Tgd | Sec61b     |
| 8.94E-64 | 0.753532167 | 0.673 | 0.403 | 1.43E-59 | Tgd | Rilpl2     |
| 1.00E-63 | 0.674083596 | 0.611 | 0.322 | 1.61E-59 | Tgd | Pdia6      |
| 1.50E-63 | 0.490498906 | 0.87  | 0.638 | 2.40E-59 | Tgd | Spcs2      |
| 2.78E-63 | 0.639811504 | 0.562 | 0.26  | 4.46E-59 | Tgd | Jun        |
| 3.64E-62 | 0.482342309 | 0.954 | 0.852 | 5.83E-58 | Tgd | Lat        |
| 2.59E-61 | 0.479897372 | 0.989 | 0.926 | 4.15E-57 | Tgd | Aldoa      |
| 3.12E-61 | 0.467832195 | 0.43  | 0.172 | 5.00E-57 | Tgd | Riox2      |
| 3.98E-61 | 0.511597485 | 0.348 | 0.118 | 6.38E-57 | Tgd | Rgcc       |
| 1.73E-60 | 0.500752985 | 0.964 | 0.883 | 2.78E-56 | Tgd | Thy1       |
| 3.16E-60 | 0.462892642 | 0.979 | 0.894 | 5.06E-56 | Tgd | Pkm        |
| 5.62E-60 | 0.425339381 | 0.979 | 0.93  | 9.01E-56 | Tgd | S100a10    |
| 6.78E-60 | 0.649407536 | 0.845 | 0.639 | 1.09E-55 | Tgd | Pgam1      |
| 1.75E-59 | 0.63964545  | 0.479 | 0.218 | 2.81E-55 | Tgd | Sdf2l1     |
| 3.51E-59 | 0.510948075 | 0.889 | 0.672 | 5.62E-55 | Tgd | Cd82       |
| 8.71E-58 | 0.563902016 | 0.52  | 0.24  | 1.40E-53 | Tgd | Ube2l6     |
| 1.22E-57 | 0.71911283  | 0.739 | 0.488 | 1.96E-53 | Tgd | Igtp       |
| 4.63E-57 | 0.498245063 | 0.462 | 0.204 | 7.42E-53 | Tgd | Acat1      |
| 1.46E-55 | 0.495343749 | 0.521 | 0.254 | 2.34E-51 | Tgd | Akirin1    |
| 2.47E-55 | 0.444018406 | 0.339 | 0.122 | 3.95E-51 | Tgd | Crmp1      |
| 2.59E-55 | 0.464749581 | 0.945 | 0.856 | 4.15E-51 | Tgd | Psme2      |
| 4.18E-55 | 0.450108679 | 0.371 | 0.143 | 6.69E-51 | Tgd | Bcl2a1d    |
| 4.98E-55 | 0.439875616 | 0.489 | 0.207 | 7.99E-51 | Tgd | Il2ra      |
| 1.27E-54 | 0.556696994 | 0.741 | 0.492 | 2.03E-50 | Tgd | P4hb       |
| 3.70E-54 | 0.306291273 | 0.989 | 0.956 | 5.94E-50 | Tgd | Serf2      |
| 2.39E-53 | 0.492401191 | 0.764 | 0.518 | 3.83E-49 | Tgd | Stk24      |
| 5.97E-53 | 0.360435895 | 0.289 | 0.095 | 9.57E-49 | Tgd | St6galnac3 |
| 8.83E-53 | 0.369051824 | 0.3   | 0.101 | 1.41E-48 | Tgd | Plin3      |
| 1.22E-52 | 0.47819128  | 0.386 | 0.157 | 1.95E-48 | Tgd | Rbpj       |
| 2.30E-52 | 0.462875211 | 0.877 | 0.694 | 3.69E-48 | Tgd | Cdk2ap2    |
| 2.00E-50 | 0.611103868 | 0.848 | 0.649 | 3.21E-46 | Tgd | Hspa5      |
| 5.79E-50 | 0.542638356 | 0.659 | 0.399 | 9.28E-46 | Tgd | Pfkip      |
| 6.62E-50 | 0.449564428 | 0.855 | 0.67  | 1.06E-45 | Tgd | Pomp       |

|          |             |       |       |          |     |           |
|----------|-------------|-------|-------|----------|-----|-----------|
| 2.15E-49 | 0.432716105 | 0.843 | 0.631 | 3.45E-45 | Tgd | Prdx6     |
| 7.35E-49 | 0.667544369 | 0.364 | 0.148 | 1.18E-44 | Tgd | Iigp1     |
| 8.35E-49 | 0.555405286 | 0.809 | 0.606 | 1.34E-44 | Tgd | Bsg       |
| 3.57E-48 | 0.443682561 | 0.882 | 0.749 | 5.72E-44 | Tgd | Krtcap2   |
| 4.26E-47 | 0.497087109 | 0.586 | 0.307 | 6.83E-43 | Tgd | Serpinb6a |
| 1.08E-46 | 0.440212726 | 0.905 | 0.768 | 1.73E-42 | Tgd | Pdia3     |
| 2.64E-46 | 0.465381324 | 0.841 | 0.667 | 4.24E-42 | Tgd | Ssr4      |
| 3.38E-46 | 0.350588215 | 0.304 | 0.112 | 5.42E-42 | Tgd | Ppp1r14b  |
| 5.00E-46 | 0.350983972 | 0.27  | 0.092 | 8.01E-42 | Tgd | Agpat5    |
| 5.14E-46 | 0.527893281 | 0.689 | 0.424 | 8.25E-42 | Tgd | Ikzf3     |
| 6.83E-46 | 0.396921114 | 0.327 | 0.124 | 1.10E-41 | Tgd | Rarg      |
| 1.35E-45 | 0.392499994 | 0.468 | 0.224 | 2.17E-41 | Tgd | Fkbp2     |
| 1.81E-45 | 0.368225161 | 0.298 | 0.106 | 2.90E-41 | Tgd | Oasl2     |
| 2.35E-45 | 0.421553753 | 0.979 | 0.93  | 3.76E-41 | Tgd | Ldha      |
| 7.74E-45 | 0.359073404 | 0.329 | 0.128 | 1.24E-40 | Tgd | Parp1     |
| 8.02E-44 | 0.444007849 | 0.821 | 0.622 | 1.28E-39 | Tgd | Cd247     |
| 8.71E-44 | 0.464561501 | 0.386 | 0.173 | 1.40E-39 | Tgd | St3gal6   |
| 1.08E-43 | 0.395365426 | 0.382 | 0.167 | 1.73E-39 | Tgd | Ccdc50    |
| 1.41E-41 | 0.364087256 | 0.888 | 0.72  | 2.25E-37 | Tgd | Cox6a1    |
| 1.89E-41 | 0.49288214  | 0.786 | 0.577 | 3.03E-37 | Tgd | Psap      |
| 1.97E-41 | 0.392101283 | 0.816 | 0.596 | 3.16E-37 | Tgd | Smdt1     |
| 5.76E-41 | 0.38535975  | 0.395 | 0.176 | 9.24E-37 | Tgd | Rara      |
| 1.58E-40 | 0.361141654 | 0.421 | 0.192 | 2.53E-36 | Tgd | Tmem154   |
| 4.46E-40 | 0.558947252 | 0.804 | 0.631 | 7.15E-36 | Tgd | Tpi1      |
| 1.14E-39 | 0.437480143 | 0.611 | 0.371 | 1.82E-35 | Tgd | Itgal     |
| 1.34E-39 | 0.473363391 | 0.725 | 0.499 | 2.15E-35 | Tgd | Calr      |
| 2.65E-39 | 0.442759331 | 0.459 | 0.239 | 4.24E-35 | Tgd | Pon2      |
| 3.31E-39 | 0.404112641 | 0.845 | 0.676 | 5.30E-35 | Tgd | Tmed2     |
| 5.47E-39 | 0.30590933  | 0.254 | 0.092 | 8.77E-35 | Tgd | Mcur1     |
| 2.16E-38 | 0.33613665  | 0.327 | 0.139 | 3.46E-34 | Tgd | 11-Sep    |
| 2.59E-38 | 0.417330329 | 0.639 | 0.394 | 4.15E-34 | Tgd | Cstb      |
| 2.91E-38 | 0.404401886 | 0.359 | 0.161 | 4.67E-34 | Tgd | Eif4e3    |
| 3.05E-38 | 0.416679794 | 0.648 | 0.427 | 4.89E-34 | Tgd | Ndufs5    |
| 3.15E-38 | 0.396022276 | 0.698 | 0.472 | 5.05E-34 | Tgd | Cst3      |
| 3.44E-38 | 0.415657065 | 0.405 | 0.199 | 5.51E-34 | Tgd | Bri3bp    |
| 1.35E-37 | 0.549453964 | 0.661 | 0.425 | 2.17E-33 | Tgd | Serpina3g |
| 7.27E-37 | 0.363246348 | 0.879 | 0.744 | 1.17E-32 | Tgd | Prr13     |
| 3.19E-36 | 0.369253139 | 0.368 | 0.171 | 5.11E-32 | Tgd | Plekho2   |
| 3.53E-36 | 0.447232768 | 0.604 | 0.382 | 5.66E-32 | Tgd | Ppp1r11   |

|          |             |       |       |          |     |           |
|----------|-------------|-------|-------|----------|-----|-----------|
| 1.01E-35 | 0.307711744 | 0.279 | 0.11  | 1.61E-31 | Tgd | Dctn1     |
| 1.27E-35 | 0.455292023 | 0.491 | 0.276 | 2.04E-31 | Tgd | Pdia4     |
| 4.94E-35 | 0.399086106 | 0.705 | 0.503 | 7.92E-31 | Tgd | Capza2    |
| 5.36E-35 | 0.427094987 | 0.657 | 0.444 | 8.59E-31 | Tgd | Cd164     |
| 1.08E-34 | 0.447726226 | 0.766 | 0.54  | 1.72E-30 | Tgd | Rgs1      |
| 1.13E-34 | 0.438693538 | 0.846 | 0.662 | 1.81E-30 | Tgd | Bst2      |
| 1.69E-34 | 0.367373406 | 0.768 | 0.545 | 2.71E-30 | Tgd | Rwdd1     |
| 1.87E-34 | 0.794764166 | 0.712 | 0.528 | 3.00E-30 | Tgd | Ndufa1    |
| 2.32E-34 | 0.304007545 | 0.948 | 0.839 | 3.72E-30 | Tgd | Ybx1      |
| 2.87E-34 | 0.483416502 | 0.6   | 0.392 | 4.60E-30 | Tgd | Ptpn6     |
| 5.88E-34 | 0.289124894 | 0.268 | 0.106 | 9.42E-30 | Tgd | Uhrf1bp1l |
| 1.11E-33 | 0.309035566 | 0.336 | 0.149 | 1.78E-29 | Tgd | Runx1     |
| 1.14E-33 | 0.380366788 | 0.45  | 0.229 | 1.82E-29 | Tgd | Slc16a3   |
| 1.29E-33 | 0.354780072 | 0.543 | 0.311 | 2.07E-29 | Tgd | Trpv2     |
| 1.64E-33 | 0.391599477 | 0.495 | 0.277 | 2.63E-29 | Tgd | Xbp1      |
| 1.83E-33 | 0.413557377 | 0.538 | 0.324 | 2.93E-29 | Tgd | Selenos   |
| 1.87E-33 | 0.380012995 | 0.654 | 0.428 | 3.00E-29 | Tgd | Rpn2      |
| 2.00E-33 | 0.331803544 | 0.879 | 0.71  | 3.21E-29 | Tgd | Fkbp1a    |
| 2.01E-33 | 0.362278322 | 0.348 | 0.164 | 3.23E-29 | Tgd | Osbp13    |
| 2.51E-33 | 0.313648543 | 0.896 | 0.807 | 4.03E-29 | Tgd | Cd47      |
| 2.52E-33 | 0.336598669 | 0.868 | 0.717 | 4.04E-29 | Tgd | Ndufa4    |
| 1.52E-32 | 0.341696831 | 0.302 | 0.133 | 2.44E-28 | Tgd | Clic4     |
| 1.36E-31 | 0.312298638 | 0.92  | 0.795 | 2.18E-27 | Tgd | Gmfg      |
| 2.29E-31 | 0.348881772 | 0.496 | 0.288 | 3.67E-27 | Tgd | Tmbim4    |
| 3.21E-31 | 0.367468205 | 0.523 | 0.31  | 5.14E-27 | Tgd | Canx      |
| 6.55E-31 | 0.393118032 | 0.871 | 0.724 | 1.05E-26 | Tgd | Pgk1      |
| 1.51E-30 | 0.350347385 | 0.389 | 0.202 | 2.43E-26 | Tgd | Bcl2a1b   |
| 1.69E-30 | 0.425766476 | 0.795 | 0.561 | 2.71E-26 | Tgd | Zfp36l1   |
| 1.80E-30 | 0.361667879 | 0.654 | 0.446 | 2.89E-26 | Tgd | Tmed10    |
| 3.11E-30 | 0.320177971 | 0.379 | 0.189 | 4.98E-26 | Tgd | Cmtm6     |
| 4.13E-30 | 0.34489794  | 0.441 | 0.238 | 6.62E-26 | Tgd | Ppa1      |
| 5.96E-30 | 0.355639352 | 0.32  | 0.15  | 9.55E-26 | Tgd | Eif4ebp1  |
| 1.00E-29 | 0.280580278 | 0.809 | 0.567 | 1.61E-25 | Tgd | Itgb7     |
| 1.60E-29 | 0.335401876 | 0.393 | 0.208 | 2.57E-25 | Tgd | Tfg       |
| 3.41E-29 | 0.284563585 | 0.945 | 0.858 | 5.46E-25 | Tgd | Eif5a     |
| 3.47E-29 | 0.348965021 | 0.8   | 0.618 | 5.57E-25 | Tgd | Cmtm7     |
| 6.45E-29 | 0.402141556 | 0.5   | 0.31  | 1.03E-24 | Tgd | Rpn1      |
| 6.65E-29 | 0.336425175 | 0.388 | 0.205 | 1.07E-24 | Tgd | Rftn1     |
| 7.83E-29 | 0.360106433 | 0.359 | 0.185 | 1.25E-24 | Tgd | Agpat4    |



|          |             |       |       |          |     |          |
|----------|-------------|-------|-------|----------|-----|----------|
| 2.01E-28 | 0.336253195 | 0.482 | 0.275 | 3.22E-24 | Tgd | Rasgrp1  |
| 2.34E-28 | 0.49076238  | 0.332 | 0.164 | 3.75E-24 | Tgd | Egr1     |
| 2.38E-28 | 0.321926438 | 0.348 | 0.173 | 3.82E-24 | Tgd | Stx11    |
| 6.19E-28 | 0.307446481 | 0.773 | 0.58  | 9.92E-24 | Tgd | Selenof  |
| 9.31E-28 | 0.317460667 | 0.409 | 0.216 | 1.49E-23 | Tgd | Cd226    |
| 1.17E-27 | 0.314334477 | 0.638 | 0.411 | 1.87E-23 | Tgd | Cish     |
| 1.54E-27 | 0.316921696 | 0.891 | 0.701 | 2.47E-23 | Tgd | Id2      |
| 3.53E-27 | 0.333791407 | 0.609 | 0.41  | 5.66E-23 | Tgd | Rnh1     |
| 3.60E-27 | 0.322736317 | 0.702 | 0.513 | 5.77E-23 | Tgd | Ostc     |
| 1.30E-26 | 0.401746756 | 0.73  | 0.551 | 2.09E-22 | Tgd | Gstp1    |
| 1.52E-26 | 0.296871008 | 0.405 | 0.222 | 2.44E-22 | Tgd | Mlec     |
| 2.25E-26 | 0.350509519 | 0.305 | 0.151 | 3.60E-22 | Tgd | Creld2   |
| 3.18E-26 | 0.345774154 | 0.688 | 0.518 | 5.10E-22 | Tgd | Ddost    |
| 4.00E-26 | 0.336743402 | 0.562 | 0.364 | 6.42E-22 | Tgd | Diaph1   |
| 4.55E-26 | 0.276246291 | 0.932 | 0.846 | 7.30E-22 | Tgd | Ppib     |
| 5.39E-26 | 0.280569602 | 0.325 | 0.158 | 8.63E-22 | Tgd | Arhgap25 |
| 5.67E-26 | 0.511621419 | 0.355 | 0.187 | 9.10E-22 | Tgd | Bnip3    |
| 1.07E-25 | 0.31260751  | 0.525 | 0.334 | 1.71E-21 | Tgd | Sms      |
| 2.71E-25 | 0.25286215  | 0.275 | 0.128 | 4.34E-21 | Tgd | Coro1c   |
| 4.39E-25 | 0.365488306 | 0.852 | 0.715 | 7.04E-21 | Tgd | Stat1    |
| 4.73E-25 | 0.351705375 | 0.6   | 0.404 | 7.58E-21 | Tgd | Sptssa   |
| 4.27E-24 | 0.292746974 | 0.42  | 0.241 | 6.84E-20 | Tgd | Impa1    |
| 5.06E-24 | 0.332713711 | 0.412 | 0.245 | 8.12E-20 | Tgd | Timm23   |
| 5.55E-24 | 0.29875526  | 0.707 | 0.504 | 8.89E-20 | Tgd | Cd69     |
| 6.87E-24 | 0.32111654  | 0.434 | 0.251 | 1.10E-19 | Tgd | Mapkapk3 |
| 6.95E-24 | 0.272626958 | 0.373 | 0.203 | 1.11E-19 | Tgd | Dctpp1   |
| 7.33E-24 | 0.346356764 | 0.386 | 0.218 | 1.17E-19 | Tgd | Clcn3    |
| 7.80E-24 | 0.299517247 | 0.3   | 0.149 | 1.25E-19 | Tgd | Ranbp2   |
| 1.49E-23 | 0.250258733 | 0.471 | 0.274 | 2.39E-19 | Tgd | Pde4b    |
| 2.61E-23 | 0.315570123 | 0.336 | 0.179 | 4.19E-19 | Tgd | Gpr65    |
| 4.32E-23 | 0.276853659 | 0.43  | 0.252 | 6.92E-19 | Tgd | Tor1aip1 |
| 5.72E-23 | 0.291735323 | 0.323 | 0.169 | 9.17E-19 | Tgd | Tbl1x    |
| 6.58E-23 | 0.288962063 | 0.541 | 0.341 | 1.05E-18 | Tgd | Psen2    |
| 8.88E-23 | 0.295809241 | 0.779 | 0.632 | 1.42E-18 | Tgd | Spcs1    |
| 1.81E-22 | 0.307339406 | 0.673 | 0.496 | 2.90E-18 | Tgd | H2-T23   |
| 2.12E-22 | 0.264066381 | 0.925 | 0.842 | 3.39E-18 | Tgd | Cox7c    |
| 3.24E-22 | 0.500600699 | 0.346 | 0.191 | 5.19E-18 | Tgd | Hilpda   |
| 3.61E-22 | 0.288542147 | 0.384 | 0.22  | 5.78E-18 | Tgd | Szrd1    |
| 5.44E-22 | 0.281138653 | 0.659 | 0.466 | 8.72E-18 | Tgd | Cyb5a    |

|          |             |       |       |          |     |            |
|----------|-------------|-------|-------|----------|-----|------------|
| 5.96E-22 | 0.328309634 | 0.311 | 0.164 | 9.56E-18 | Tgd | Tab2       |
| 6.78E-22 | 0.277816939 | 0.727 | 0.564 | 1.09E-17 | Tgd | Psmid8     |
| 8.21E-22 | 0.267896191 | 0.896 | 0.814 | 1.32E-17 | Tgd | Ubl5       |
| 9.58E-22 | 0.323263126 | 0.445 | 0.28  | 1.54E-17 | Tgd | Tmem208    |
| 2.63E-21 | 0.30409656  | 0.679 | 0.503 | 4.21E-17 | Tgd | Tax1bp1    |
| 3.64E-21 | 0.312646136 | 0.839 | 0.699 | 5.83E-17 | Tgd | Eno1       |
| 3.87E-21 | 0.261337199 | 0.875 | 0.751 | 6.20E-17 | Tgd | Anp32a     |
| 7.16E-21 | 0.262360626 | 0.339 | 0.184 | 1.15E-16 | Tgd | Nfil3      |
| 1.09E-20 | 0.29890342  | 0.446 | 0.273 | 1.74E-16 | Tgd | Irgm1      |
| 1.17E-20 | 0.255173424 | 0.938 | 0.858 | 1.87E-16 | Tgd | Selenow    |
| 1.89E-20 | 0.289719589 | 0.502 | 0.329 | 3.02E-16 | Tgd | Cib1       |
| 1.94E-20 | 0.310690997 | 0.779 | 0.634 | 3.12E-16 | Tgd | Psemb10    |
| 2.55E-20 | 0.323927144 | 0.414 | 0.247 | 4.09E-16 | Tgd | Tgtp2      |
| 3.78E-20 | 0.280165738 | 0.673 | 0.518 | 6.07E-16 | Tgd | Tmem14c    |
| 4.95E-20 | 0.310322459 | 0.904 | 0.827 | 7.93E-16 | Tgd | Mif        |
| 8.34E-20 | 0.256237004 | 0.695 | 0.519 | 1.34E-15 | Tgd | M6pr       |
| 1.09E-19 | 0.26531671  | 0.762 | 0.606 | 1.74E-15 | Tgd | Tecr       |
| 1.12E-19 | 0.309091106 | 0.493 | 0.33  | 1.80E-15 | Tgd | Gbp4       |
| 1.22E-19 | 0.355384839 | 0.459 | 0.301 | 1.95E-15 | Tgd | Gbp2       |
| 1.52E-19 | 0.277099768 | 0.775 | 0.661 | 2.43E-15 | Tgd | Ppp1cc     |
| 1.64E-19 | 0.333983273 | 0.311 | 0.168 | 2.62E-15 | Tgd | Plk3       |
| 2.27E-19 | 0.28502669  | 0.516 | 0.353 | 3.63E-15 | Tgd | Dnajb11    |
| 4.77E-19 | 0.283359616 | 0.814 | 0.696 | 7.64E-15 | Tgd | Ostf1      |
| 5.82E-19 | 0.323851873 | 0.696 | 0.503 | 9.33E-15 | Tgd | Pdcd1      |
| 9.26E-19 | 0.266792598 | 0.534 | 0.362 | 1.48E-14 | Tgd | D16Ert472e |
| 9.44E-19 | 0.305191301 | 0.584 | 0.416 | 1.51E-14 | Tgd | Dnajc3     |
| 9.52E-19 | 0.324647801 | 0.65  | 0.479 | 1.53E-14 | Tgd | Smpdl3a    |
| 1.03E-18 | 0.279812107 | 0.568 | 0.4   | 1.65E-14 | Tgd | Ncor1      |
| 1.15E-18 | 0.251897192 | 0.825 | 0.693 | 1.84E-14 | Tgd | Eif4a1     |
| 1.53E-18 | 0.286944223 | 0.257 | 0.134 | 2.46E-14 | Tgd | Zfp414     |
| 1.79E-18 | 0.258705246 | 0.839 | 0.751 | 2.86E-14 | Tgd | Slc25a5    |
| 1.85E-18 | 0.277677117 | 0.48  | 0.314 | 2.96E-14 | Tgd | Fnbp1      |
| 2.09E-18 | 0.403865109 | 0.514 | 0.361 | 3.36E-14 | Tgd | Fam162a    |
| 6.09E-18 | 0.254857729 | 0.427 | 0.268 | 9.76E-14 | Tgd | Utp11      |
| 8.88E-18 | 0.284703987 | 0.532 | 0.371 | 1.42E-13 | Tgd | Spn        |
| 1.42E-17 | 0.25731104  | 0.348 | 0.203 | 2.28E-13 | Tgd | Fam129a    |
| 2.66E-17 | 0.280305623 | 0.557 | 0.397 | 4.27E-13 | Tgd | Ptpn7      |
| 5.16E-17 | 0.252590278 | 0.389 | 0.244 | 8.26E-13 | Tgd | Tex264     |
| 5.41E-17 | 0.283197824 | 0.35  | 0.204 | 8.67E-13 | Tgd | Phlda1     |

|           |             |       |       |            |           |          |
|-----------|-------------|-------|-------|------------|-----------|----------|
| 1.78E-16  | 0.266778916 | 0.486 | 0.331 | 2.85E-12   | Tgd       | Nfkbib   |
| 2.19E-16  | 0.253043981 | 0.388 | 0.244 | 3.51E-12   | Tgd       | Rrbp1    |
| 3.23E-16  | 0.272355878 | 0.254 | 0.137 | 5.18E-12   | Tgd       | Ap1s2    |
| 4.94E-16  | 0.275446247 | 0.502 | 0.351 | 7.91E-12   | Tgd       | Rtn4     |
| 1.93E-15  | 0.251590246 | 0.53  | 0.381 | 3.09E-11   | Tgd       | Cmpk1    |
| 2.54E-15  | 0.251154671 | 0.459 | 0.311 | 4.07E-11   | Tgd       | Top2b    |
| 3.07E-14  | 0.261438738 | 0.264 | 0.154 | 4.92E-10   | Tgd       | Gbp8     |
| 2.58E-13  | 0.281772436 | 0.452 | 0.322 | 4.13E-09   | Tgd       | Ehd1     |
| 3.62E-13  | 0.25303655  | 0.736 | 0.616 | 5.80E-09   | Tgd       | Ccnd3    |
| 8.13E-13  | 0.25242209  | 0.43  | 0.305 | 1.30E-08   | Tgd       | Ahsa1    |
| 9.94E-13  | 0.251803746 | 0.304 | 0.19  | 1.59E-08   | Tgd       | Rcbtb2   |
| 8.09E-10  | 0.254676059 | 0.68  | 0.559 | 1.30E-05   | Tgd       | Hsp90aa1 |
| 1.58E-06  | 0.368414723 | 0.296 | 0.228 | 0.02537182 | Tgd       | Gem      |
| 0         | 2.509741462 | 0.686 | 0.023 | 0          | Cd4 Naive | Igfbp4   |
| 0         | 1.719501237 | 0.829 | 0.107 | 0          | Cd4 Naive | Ccr7     |
| 0         | 1.096665927 | 0.323 | 0.016 | 0          | Cd4 Naive | Ly6c1    |
| 7.08E-232 | 1.265703689 | 0.531 | 0.068 | 1.14E-227  | Cd4 Naive | Rflnb    |
| 2.28E-207 | 1.742107302 | 0.929 | 0.283 | 3.65E-203  | Cd4 Naive | Klf2     |
| 1.06E-182 | 1.331486892 | 0.783 | 0.21  | 1.70E-178  | Cd4 Naive | Lef1     |
| 3.13E-181 | 1.002615672 | 0.444 | 0.06  | 5.01E-177  | Cd4 Naive | Il6ra    |
| 2.94E-166 | 0.800414848 | 0.314 | 0.032 | 4.72E-162  | Cd4 Naive | Atp1b1   |
| 1.04E-156 | 1.259784378 | 0.767 | 0.217 | 1.67E-152  | Cd4 Naive | Tcf7     |
| 1.41E-146 | 0.673373255 | 1     | 0.996 | 2.27E-142  | Cd4 Naive | Rps24    |
| 1.74E-136 | 0.7433002   | 1     | 0.989 | 2.79E-132  | Cd4 Naive | Rps19    |
| 5.31E-134 | 0.670942308 | 1     | 0.988 | 8.51E-130  | Cd4 Naive | Rpl8     |
| 8.97E-127 | 0.618207161 | 1     | 0.988 | 1.44E-122  | Cd4 Naive | Rpl35a   |
| 1.46E-126 | 0.553959047 | 1     | 0.997 | 2.34E-122  | Cd4 Naive | Rps16    |
| 7.79E-124 | 0.657170697 | 1     | 0.991 | 1.25E-119  | Cd4 Naive | Rps20    |
| 5.89E-122 | 0.626939684 | 1     | 0.993 | 9.45E-118  | Cd4 Naive | Rplp1    |
| 1.46E-121 | 0.559197341 | 1     | 0.996 | 2.35E-117  | Cd4 Naive | Tpt1     |
| 2.26E-120 | 0.741915391 | 0.991 | 0.962 | 3.62E-116  | Cd4 Naive | Rps29    |
| 1.15E-116 | 0.54087141  | 1     | 0.992 | 1.84E-112  | Cd4 Naive | Rps27a   |
| 2.07E-114 | 0.575907017 | 1     | 0.994 | 3.31E-110  | Cd4 Naive | Rps8     |
| 1.95E-112 | 0.55929273  | 1     | 0.993 | 3.13E-108  | Cd4 Naive | Rps4x    |
| 3.85E-112 | 0.544855969 | 1     | 0.992 | 6.17E-108  | Cd4 Naive | Rps3a1   |
| 3.86E-112 | 0.653528705 | 1     | 0.983 | 6.19E-108  | Cd4 Naive | Rps27    |
| 5.70E-109 | 0.74450095  | 0.994 | 0.958 | 9.14E-105  | Cd4 Naive | Rpl12    |
| 7.83E-105 | 1.043529945 | 0.599 | 0.178 | 1.26E-100  | Cd4 Naive | Satb1    |
| 1.11E-102 | 0.482179349 | 0.997 | 0.994 | 1.78E-98   | Cd4 Naive | Rpl23    |

|           |             |       |       |          |           |          |
|-----------|-------------|-------|-------|----------|-----------|----------|
| 1.23E-102 | 0.428021938 | 1     | 0.997 | 1.97E-98 | Cd4 Naive | Rpl19    |
| 1.11E-101 | 0.467128319 | 1     | 0.993 | 1.78E-97 | Cd4 Naive | Rpl30    |
| 6.23E-101 | 1.238899983 | 0.661 | 0.226 | 9.98E-97 | Cd4 Naive | Socs3    |
| 1.02E-98  | 0.499867004 | 1     | 0.992 | 1.63E-94 | Cd4 Naive | Rpl21    |
| 1.24E-98  | 0.463565893 | 1     | 0.997 | 2.00E-94 | Cd4 Naive | Rpl13    |
| 5.24E-96  | 0.814997108 | 0.407 | 0.086 | 8.41E-92 | Cd4 Naive | Nsg2     |
| 3.48E-94  | 0.578208686 | 1     | 0.975 | 5.57E-90 | Cd4 Naive | Rps7     |
| 4.21E-94  | 0.540040535 | 1     | 0.981 | 6.75E-90 | Cd4 Naive | Rps21    |
| 5.89E-94  | 0.918889885 | 0.481 | 0.126 | 9.43E-90 | Cd4 Naive | Actn1    |
| 1.85E-89  | 0.45366026  | 0.997 | 0.989 | 2.96E-85 | Cd4 Naive | Rps9     |
| 3.27E-89  | 0.556640855 | 1     | 0.988 | 5.25E-85 | Cd4 Naive | mt-Atp6  |
| 6.50E-89  | 0.441485956 | 1     | 0.993 | 1.04E-84 | Cd4 Naive | Rpl9     |
| 1.95E-88  | 0.449940761 | 1     | 0.993 | 3.13E-84 | Cd4 Naive | Rps5     |
| 2.39E-87  | 0.940064931 | 0.447 | 0.111 | 3.83E-83 | Cd4 Naive | Klf3     |
| 1.35E-86  | 0.611754516 | 0.997 | 0.951 | 2.17E-82 | Cd4 Naive | Rps28    |
| 3.30E-86  | 0.419094919 | 1     | 0.993 | 5.29E-82 | Cd4 Naive | Rps10    |
| 3.31E-86  | 0.445892086 | 1     | 0.989 | 5.31E-82 | Cd4 Naive | Rps14    |
| 3.20E-85  | 0.697128208 | 0.273 | 0.045 | 5.13E-81 | Cd4 Naive | Trib2    |
| 2.83E-83  | 0.906600713 | 0.553 | 0.171 | 4.54E-79 | Cd4 Naive | Sell     |
| 2.59E-81  | 0.503648113 | 0.984 | 0.973 | 4.15E-77 | Cd4 Naive | Rpl7     |
| 1.25E-80  | 0.641413799 | 0.981 | 0.916 | 2.00E-76 | Cd4 Naive | Rpl5     |
| 1.64E-79  | 0.40177858  | 1     | 0.992 | 2.63E-75 | Cd4 Naive | Rps3     |
| 4.20E-79  | 0.450772519 | 1     | 0.985 | 6.73E-75 | Cd4 Naive | Rps23    |
| 2.78E-78  | 0.380118052 | 1     | 0.994 | 4.46E-74 | Cd4 Naive | Rpl27a   |
| 7.57E-78  | 1.176887468 | 0.64  | 0.274 | 1.21E-73 | Cd4 Naive | Pde4b    |
| 3.43E-74  | 0.381945634 | 1     | 0.994 | 5.50E-70 | Cd4 Naive | Rpl17    |
| 1.77E-73  | 0.386682143 | 1     | 0.995 | 2.84E-69 | Cd4 Naive | Rplp0    |
| 3.29E-73  | 0.426256731 | 1     | 0.992 | 5.27E-69 | Cd4 Naive | Rpl37a   |
| 1.68E-72  | 0.351798538 | 1     | 0.994 | 2.70E-68 | Cd4 Naive | Rps13    |
| 2.03E-71  | 0.447765684 | 1     | 0.975 | 3.26E-67 | Cd4 Naive | Rpl10a   |
| 1.91E-68  | 0.573518469 | 0.988 | 0.921 | 3.06E-64 | Cd4 Naive | Rpl36a   |
| 1.30E-66  | 0.344612105 | 1     | 0.996 | 2.09E-62 | Cd4 Naive | Rpl18a   |
| 1.29E-65  | 0.465746679 | 0.997 | 0.959 | 2.07E-61 | Cd4 Naive | Rpl10    |
| 3.73E-64  | 0.403187481 | 1     | 0.981 | 5.97E-60 | Cd4 Naive | Rpl3     |
| 8.77E-64  | 0.97004808  | 0.68  | 0.336 | 1.41E-59 | Cd4 Naive | Ppp1r15a |
| 1.35E-63  | 0.395055162 | 0.997 | 0.983 | 2.17E-59 | Cd4 Naive | Rplp2    |
| 5.96E-63  | 0.831465811 | 0.522 | 0.186 | 9.55E-59 | Cd4 Naive | S1pr1    |
| 7.52E-63  | 0.705821896 | 0.348 | 0.09  | 1.21E-58 | Cd4 Naive | Sh3bp5   |
| 1.20E-62  | 0.580362676 | 0.975 | 0.942 | 1.93E-58 | Cd4 Naive | mt-Cytb  |

|          |             |       |       |          |           |         |
|----------|-------------|-------|-------|----------|-----------|---------|
| 3.58E-62 | 0.418948417 | 1     | 0.978 | 5.74E-58 | Cd4 Naive | Rpl15   |
| 7.77E-62 | 0.867052042 | 0.745 | 0.458 | 1.25E-57 | Cd4 Naive | Rapgef6 |
| 2.12E-61 | 0.392013447 | 1     | 0.988 | 3.40E-57 | Cd4 Naive | Rps26   |
| 3.30E-61 | 0.787969661 | 0.28  | 0.06  | 5.29E-57 | Cd4 Naive | Dapl1   |
| 4.94E-61 | 0.292780583 | 1     | 0.998 | 7.91E-57 | Cd4 Naive | Eef1a1  |
| 2.11E-59 | 0.441015175 | 0.994 | 0.97  | 3.38E-55 | Cd4 Naive | Rps18   |
| 3.50E-59 | 0.394023699 | 0.994 | 0.98  | 5.61E-55 | Cd4 Naive | Rpl26   |
| 6.24E-59 | 0.365059958 | 1     | 0.989 | 1.00E-54 | Cd4 Naive | Rpl6    |
| 5.00E-58 | 0.604280983 | 0.963 | 0.899 | 8.01E-54 | Cd4 Naive | mt-Nd4l |
| 1.82E-57 | 0.456776355 | 0.994 | 0.979 | 2.91E-53 | Cd4 Naive | mt-Co3  |
| 2.61E-57 | 0.718450026 | 0.969 | 0.892 | 4.19E-53 | Cd4 Naive | Junb    |
| 1.20E-56 | 0.445593399 | 0.994 | 0.955 | 1.93E-52 | Cd4 Naive | Rpl35   |
| 3.98E-55 | 0.668435155 | 0.907 | 0.783 | 6.38E-51 | Cd4 Naive | mt-Nd2  |
| 9.16E-55 | 0.817062268 | 0.556 | 0.249 | 1.47E-50 | Cd4 Naive | Foxp1   |
| 9.82E-54 | 0.74584906  | 0.401 | 0.131 | 1.57E-49 | Cd4 Naive | Rasgrp2 |
| 2.54E-52 | 0.351063358 | 1     | 0.988 | 4.08E-48 | Cd4 Naive | Rpl39   |
| 3.23E-52 | 0.434449647 | 0.997 | 0.972 | 5.17E-48 | Cd4 Naive | Rpl14   |
| 3.71E-52 | 0.670560769 | 0.32  | 0.088 | 5.95E-48 | Cd4 Naive | Pik3ip1 |
| 7.92E-52 | 0.59647672  | 0.963 | 0.849 | 1.27E-47 | Cd4 Naive | Btg1    |
| 1.58E-49 | 0.335928753 | 1     | 0.988 | 2.53E-45 | Cd4 Naive | Rpl36   |
| 4.18E-48 | 0.287154943 | 1     | 0.995 | 6.70E-44 | Cd4 Naive | Rpl18   |
| 1.81E-46 | 0.292538914 | 1     | 0.997 | 2.90E-42 | Cd4 Naive | Rpsa    |
| 1.87E-46 | 0.290041149 | 1     | 0.993 | 2.99E-42 | Cd4 Naive | Rpl11   |
| 6.70E-44 | 0.39583842  | 0.972 | 0.955 | 1.07E-39 | Cd4 Naive | Rps6    |
| 2.18E-43 | 0.702411221 | 0.823 | 0.574 | 3.50E-39 | Cd4 Naive | Zfp36   |
| 8.07E-43 | 0.436911854 | 0.969 | 0.939 | 1.29E-38 | Cd4 Naive | Eef1b2  |
| 1.31E-42 | 0.256284193 | 1     | 0.995 | 2.09E-38 | Cd4 Naive | Rps15a  |
| 3.03E-41 | 0.758961648 | 0.475 | 0.206 | 4.86E-37 | Cd4 Naive | Selenop |
| 1.59E-40 | 0.706011109 | 0.668 | 0.435 | 2.55E-36 | Cd4 Naive | Crlf3   |
| 1.77E-40 | 0.759068045 | 0.64  | 0.404 | 2.84E-36 | Cd4 Naive | Dgka    |
| 1.40E-39 | 0.847421152 | 0.534 | 0.264 | 2.24E-35 | Cd4 Naive | Jun     |
| 2.60E-38 | 0.31445599  | 1     | 0.982 | 4.17E-34 | Cd4 Naive | Rpl28   |
| 6.62E-38 | 0.649249591 | 0.665 | 0.37  | 1.06E-33 | Cd4 Naive | Il7r    |
| 8.85E-38 | 0.468073546 | 0.944 | 0.872 | 1.42E-33 | Cd4 Naive | mt-Nd1  |
| 1.96E-37 | 0.387197661 | 0.981 | 0.933 | 3.15E-33 | Cd4 Naive | Rpl4    |
| 2.30E-37 | 0.375884827 | 0.978 | 0.948 | 3.69E-33 | Cd4 Naive | Rack1   |
| 3.41E-37 | 0.312027203 | 1     | 0.99  | 5.47E-33 | Cd4 Naive | Rps2    |
| 2.13E-36 | 0.268477688 | 1     | 0.994 | 3.42E-32 | Cd4 Naive | Rpl32   |
| 1.94E-35 | 0.317982938 | 0.991 | 0.988 | 3.11E-31 | Cd4 Naive | mt-Co2  |

|          |             |       |       |          |           |         |
|----------|-------------|-------|-------|----------|-----------|---------|
| 2.99E-35 | 0.664499135 | 0.401 | 0.168 | 4.79E-31 | Cd4 Naive | Ripor2  |
| 1.69E-34 | 0.67434161  | 0.413 | 0.184 | 2.71E-30 | Cd4 Naive | Txk     |
| 1.95E-34 | 0.695564669 | 0.637 | 0.4   | 3.13E-30 | Cd4 Naive | Tsc22d3 |
| 7.18E-34 | 0.758102306 | 0.581 | 0.33  | 1.15E-29 | Cd4 Naive | Bcl2    |
| 7.30E-33 | 0.812657449 | 0.714 | 0.541 | 1.17E-28 | Cd4 Naive | Irf1    |
| 1.26E-31 | 0.597713367 | 0.72  | 0.561 | 2.03E-27 | Cd4 Naive | Atp1b3  |
| 2.29E-31 | 0.510685645 | 0.835 | 0.712 | 3.67E-27 | Cd4 Naive | Cytip   |
| 1.36E-30 | 0.581856961 | 0.335 | 0.136 | 2.18E-26 | Cd4 Naive | Stat5b  |
| 2.68E-29 | 0.42249311  | 0.276 | 0.096 | 4.30E-25 | Cd4 Naive | Trat1   |
| 1.27E-28 | 0.433009547 | 0.944 | 0.915 | 2.04E-24 | Cd4 Naive | Ddx5    |
| 2.52E-28 | 0.270635879 | 0.991 | 0.975 | 4.03E-24 | Cd4 Naive | Rpl22   |
| 9.45E-28 | 0.660405154 | 0.609 | 0.427 | 1.51E-23 | Cd4 Naive | Ablim1  |
| 3.68E-27 | 0.502366282 | 0.817 | 0.707 | 5.91E-23 | Cd4 Naive | mt-Atp8 |
| 1.91E-24 | 0.37002284  | 0.913 | 0.847 | 3.06E-20 | Cd4 Naive | Rps25   |
| 6.63E-24 | 0.526938355 | 0.329 | 0.147 | 1.06E-19 | Cd4 Naive | Gm2682  |
| 2.15E-23 | 0.328762534 | 0.932 | 0.881 | 3.45E-19 | Cd4 Naive | Npm1    |
| 3.60E-23 | 0.713376893 | 0.255 | 0.101 | 5.78E-19 | Cd4 Naive | Gadd45g |
| 3.87E-23 | 0.349649174 | 0.953 | 0.917 | 6.20E-19 | Cd4 Naive | Limd2   |
| 2.37E-22 | 0.313854348 | 0.935 | 0.888 | 3.80E-18 | Cd4 Naive | Rps15   |
| 3.15E-22 | 0.437118653 | 0.792 | 0.703 | 5.05E-18 | Cd4 Naive | Ets1    |
| 6.66E-22 | 0.590034002 | 0.714 | 0.589 | 1.07E-17 | Cd4 Naive | Ier2    |
| 1.12E-21 | 0.500721113 | 0.649 | 0.507 | 1.80E-17 | Cd4 Naive | Gm8369  |
| 3.10E-20 | 0.500817335 | 0.255 | 0.109 | 4.98E-16 | Cd4 Naive | Zfp281  |
| 3.56E-20 | 0.427241455 | 0.767 | 0.716 | 5.70E-16 | Cd4 Naive | Cox7a2l |
| 9.96E-20 | 0.479990208 | 0.565 | 0.382 | 1.60E-15 | Cd4 Naive | Rgs10   |
| 8.32E-19 | 0.49786913  | 0.373 | 0.204 | 1.33E-14 | Cd4 Naive | Ssh2    |
| 1.80E-18 | 0.428438162 | 0.745 | 0.665 | 2.89E-14 | Cd4 Naive | mt-Nd5  |
| 6.38E-17 | 0.528704348 | 0.276 | 0.138 | 1.02E-12 | Cd4 Naive | Stt3b   |
| 1.74E-15 | 0.387291181 | 0.674 | 0.585 | 2.79E-11 | Cd4 Naive | Rabac1  |
| 2.00E-15 | 0.427484176 | 0.304 | 0.159 | 3.20E-11 | Cd4 Naive | Rasa3   |
| 2.38E-15 | 0.474980132 | 0.59  | 0.464 | 3.82E-11 | Cd4 Naive | Socs1   |
| 3.06E-15 | 0.281071894 | 0.898 | 0.897 | 4.90E-11 | Cd4 Naive | Ftl1    |
| 6.05E-15 | 0.3611864   | 0.755 | 0.707 | 9.69E-11 | Cd4 Naive | mt-Nd4  |
| 6.79E-15 | 0.455803515 | 0.304 | 0.165 | 1.09E-10 | Cd4 Naive | Gpr18   |
| 1.89E-14 | 0.310096305 | 0.829 | 0.755 | 3.04E-10 | Cd4 Naive | Gimap6  |
| 2.79E-14 | 0.319163492 | 0.866 | 0.841 | 4.47E-10 | Cd4 Naive | Rpl22l1 |
| 3.18E-14 | 0.428864146 | 0.422 | 0.279 | 5.10E-10 | Cd4 Naive | Mcl1    |
| 5.23E-14 | 0.412213396 | 0.481 | 0.359 | 8.39E-10 | Cd4 Naive | Gm10073 |
| 1.24E-13 | 0.399458506 | 0.289 | 0.157 | 1.99E-09 | Cd4 Naive | Il4ra   |

|          |             |       |       |             |           |          |
|----------|-------------|-------|-------|-------------|-----------|----------|
| 1.39E-13 | 0.400791554 | 0.317 | 0.183 | 2.22E-09    | Cd4 Naive | Pdlim1   |
| 3.41E-13 | 0.405765269 | 0.46  | 0.34  | 5.46E-09    | Cd4 Naive | Arhgap15 |
| 8.23E-13 | 0.409701247 | 0.363 | 0.23  | 1.32E-08    | Cd4 Naive | Hmgn1    |
| 1.03E-12 | 0.401384445 | 0.45  | 0.321 | 1.65E-08    | Cd4 Naive | Eif4a2   |
| 1.35E-12 | 0.451400608 | 0.286 | 0.163 | 2.16E-08    | Cd4 Naive | Klhdc2   |
| 1.76E-12 | 0.427778915 | 0.55  | 0.421 | 2.83E-08    | Cd4 Naive | Vps37b   |
| 3.15E-12 | 0.374761601 | 0.637 | 0.546 | 5.04E-08    | Cd4 Naive | Peli1    |
| 4.17E-12 | 0.389519897 | 0.571 | 0.483 | 6.68E-08    | Cd4 Naive | Srsf5    |
| 1.06E-11 | 0.303982169 | 0.848 | 0.83  | 1.69E-07    | Cd4 Naive | Pnrc1    |
| 1.07E-11 | 0.276377157 | 0.845 | 0.799 | 1.72E-07    | Cd4 Naive | Rpl31    |
| 1.29E-11 | 0.434695133 | 0.45  | 0.349 | 2.07E-07    | Cd4 Naive | Gm9493   |
| 1.77E-11 | 0.525846139 | 0.596 | 0.508 | 2.83E-07    | Cd4 Naive | Cd69     |
| 2.28E-11 | 0.462871601 | 0.46  | 0.358 | 3.66E-07    | Cd4 Naive | Chd3     |
| 7.14E-11 | 0.355751525 | 0.345 | 0.226 | 1.14E-06    | Cd4 Naive | Utrn     |
| 7.89E-11 | 0.399494538 | 0.413 | 0.299 | 1.26E-06    | Cd4 Naive | Fam102a  |
| 1.86E-10 | 0.322192784 | 0.652 | 0.552 | 2.99E-06    | Cd4 Naive | Pim1     |
| 2.88E-10 | 0.425978048 | 0.612 | 0.539 | 4.62E-06    | Cd4 Naive | Txnip    |
| 4.61E-10 | 0.265827979 | 0.609 | 0.478 | 7.39E-06    | Cd4 Naive | Emb      |
| 1.01E-09 | 0.466814014 | 0.301 | 0.202 | 1.62E-05    | Cd4 Naive | Ndr3     |
| 1.03E-09 | 0.31407816  | 0.755 | 0.714 | 1.65E-05    | Cd4 Naive | Arhgap45 |
| 1.66E-09 | 0.34710125  | 0.388 | 0.275 | 2.67E-05    | Cd4 Naive | Arl4c    |
| 1.84E-09 | 0.375667236 | 0.345 | 0.238 | 2.95E-05    | Cd4 Naive | Stk38    |
| 1.94E-09 | 0.351252025 | 0.283 | 0.175 | 3.10E-05    | Cd4 Naive | Slamf6   |
| 2.08E-09 | 0.384704317 | 0.453 | 0.357 | 3.33E-05    | Cd4 Naive | mt-Nd3   |
| 2.22E-09 | 0.40664201  | 0.419 | 0.327 | 3.56E-05    | Cd4 Naive | Rps27rt  |
| 3.30E-09 | 0.330400036 | 0.261 | 0.159 | 5.30E-05    | Cd4 Naive | Tmem71   |
| 3.63E-09 | 0.366531794 | 0.28  | 0.173 | 5.82E-05    | Cd4 Naive | Tcp11l2  |
| 9.31E-09 | 0.360493785 | 0.398 | 0.301 | 0.000149255 | Cd4 Naive | Tgfb2    |
| 1.33E-08 | 0.294073422 | 0.63  | 0.602 | 0.000213692 | Cd4 Naive | Ube2d2a  |
| 1.68E-08 | 0.274296885 | 0.997 | 0.997 | 0.000269113 | Cd4 Naive | Gm42418  |
| 1.69E-08 | 0.291785301 | 0.677 | 0.661 | 0.000270403 | Cd4 Naive | Arhgef1  |
| 2.05E-08 | 0.321005769 | 0.447 | 0.36  | 0.000329228 | Cd4 Naive | Inpp4b   |
| 3.76E-08 | 0.3312006   | 0.348 | 0.25  | 0.000602801 | Cd4 Naive | Clk1     |
| 1.04E-07 | 0.369553524 | 0.724 | 0.746 | 0.001660832 | Cd4 Naive | Stk17b   |
| 1.17E-07 | 0.32655385  | 0.36  | 0.258 | 0.001882553 | Cd4 Naive | Tspan32  |
| 1.30E-07 | 0.344383278 | 0.332 | 0.242 | 0.002081348 | Cd4 Naive | Klf13    |
| 1.42E-07 | 0.388466727 | 0.391 | 0.316 | 0.002281764 | Cd4 Naive | Phf20l1  |
| 1.83E-07 | 0.345992412 | 0.36  | 0.277 | 0.002938634 | Cd4 Naive | Grap2    |
| 2.41E-07 | 0.391795545 | 0.357 | 0.271 | 0.003858102 | Cd4 Naive | Slc38a2  |

|             |             |       |       |             |           |               |
|-------------|-------------|-------|-------|-------------|-----------|---------------|
| 3.72E-07    | 0.329717246 | 0.32  | 0.229 | 0.005955973 | Cd4 Naive | Smad7         |
| 6.83E-07    | 0.251995614 | 0.54  | 0.438 | 0.010941602 | Cd4 Naive | Fos           |
| 8.39E-07    | 0.32951239  | 0.267 | 0.183 | 0.013442726 | Cd4 Naive | Bzw2          |
| 8.43E-07    | 0.385259749 | 0.429 | 0.37  | 0.013503896 | Cd4 Naive | Rnf167        |
| 1.14E-06    | 0.344972699 | 0.273 | 0.189 | 0.018289665 | Cd4 Naive | Nfkbiz        |
| 1.32E-06    | 0.491001196 | 0.28  | 0.199 | 0.021113524 | Cd4 Naive | Csrnp1        |
| 1.75E-06    | 0.34449488  | 0.295 | 0.213 | 0.028118499 | Cd4 Naive | Klhl6         |
| 2.14E-06    | 0.29077851  | 0.509 | 0.479 | 0.034310403 | Cd4 Naive | Skp1a         |
| 2.44E-06    | 0.334707823 | 0.258 | 0.18  | 0.039168295 | Cd4 Naive | Epc1          |
| 2.69E-06    | 0.294585654 | 0.429 | 0.353 | 0.043164768 | Cd4 Naive | Evl           |
| 3.84E-06    | 0.319527366 | 0.323 | 0.248 | 0.061545205 | Cd4 Naive | Atp11b        |
| 3.91E-06    | 0.264214407 | 0.382 | 0.309 | 0.062619731 | Cd4 Naive | Cdkn1b        |
| 5.37E-06    | 0.330265538 | 0.419 | 0.354 | 0.086002783 | Cd4 Naive | Foxo1         |
| 5.40E-06    | 0.309802875 | 0.32  | 0.248 | 0.086556621 | Cd4 Naive | Phf3          |
| 5.56E-06    | 0.302153302 | 0.388 | 0.321 | 0.089144671 | Cd4 Naive | Fbl           |
| 5.81E-06    | 0.322355559 | 0.637 | 0.654 | 0.093123868 | Cd4 Naive | Tpr           |
| 6.34E-06    | 0.344858508 | 0.276 | 0.207 | 0.101555385 | Cd4 Naive | Add1          |
| 1.02E-05    | 0.302226467 | 0.326 | 0.254 | 0.164035958 | Cd4 Naive | Retreg1       |
| 1.57E-05    | 0.278354643 | 0.481 | 0.457 | 0.252154899 | Cd4 Naive | Scp2          |
| 1.73E-05    | 0.281337503 | 0.252 | 0.178 | 0.277563881 | Cd4 Naive | Kbtbd11       |
| 1.76E-05    | 0.339215977 | 0.295 | 0.229 | 0.281529874 | Cd4 Naive | Add3          |
| 1.87E-05    | 0.285769718 | 0.528 | 0.506 | 0.299251361 | Cd4 Naive | Zc3hav1       |
| 3.22E-05    | 0.319230282 | 0.416 | 0.372 | 0.515323608 | Cd4 Naive | Psip1         |
| 4.95E-05    | 0.276377476 | 0.531 | 0.532 | 0.793396168 | Cd4 Naive | Gm11808       |
| 5.80E-05    | 0.255635184 | 0.301 | 0.235 | 0.929625965 | Cd4 Naive | Macf1         |
| 7.18E-05    | 0.288237244 | 0.752 | 0.716 | 1           | Cd4 Naive | Nfkbia        |
| 9.08E-05    | 0.299799744 | 0.376 | 0.332 | 1           | Cd4 Naive | Mrpl23        |
| 9.27E-05    | 0.278158042 | 0.373 | 0.318 | 1           | Cd4 Naive | Gramd1a       |
| 0.000121336 | 0.300836182 | 0.264 | 0.205 | 1           | Cd4 Naive | Osbpl9        |
| 0.000151126 | 0.288262931 | 0.267 | 0.207 | 1           | Cd4 Naive | Foxn3         |
| 0.000193404 | 0.297126213 | 0.314 | 0.259 | 1           | Cd4 Naive | Pik3cd        |
| 0.000227335 | 0.273840524 | 0.366 | 0.32  | 1           | Cd4 Naive | 2810474019Rik |
| 0.000272683 | 0.286511438 | 0.273 | 0.216 | 1           | Cd4 Naive | Sun2          |
| 0.000345519 | 0.323362255 | 0.388 | 0.361 | 1           | Cd4 Naive | Srpk1         |
| 0.000350487 | 0.296187819 | 0.301 | 0.251 | 1           | Cd4 Naive | Ikzf1         |
| 0.000455685 | 0.320401359 | 0.307 | 0.258 | 1           | Cd4 Naive | Pdcd4         |
| 0.000475653 | 0.255701032 | 0.45  | 0.421 | 1           | Cd4 Naive | Nsd3          |
| 0.000693608 | 0.402883478 | 0.466 | 0.453 | 1           | Cd4 Naive | Smc4          |
| 0.001388395 | 0.258779551 | 0.77  | 0.777 | 1           | Cd4 Naive | Lars2         |



|             |             |       |       |   |           |         |
|-------------|-------------|-------|-------|---|-----------|---------|
| 0.002028054 | 0.268123662 | 0.373 | 0.346 | 1 | Cd4 Naive | Smchd1  |
| 0.002164335 | 0.290821311 | 0.252 | 0.209 | 1 | Cd4 Naive | Kif21b  |
| 0.003268469 | 0.293337651 | 0.342 | 0.31  | 1 | Cd4 Naive | Cdkn2d  |
| 0.005124053 | 0.255285429 | 0.304 | 0.276 | 1 | Cd4 Naive | Ccm2    |
| 0.00918672  | 0.376799835 | 0.208 | 0.306 | 1 | Cd4 Naive | Gbp2    |
| 0.009515878 | 0.274425084 | 0.304 | 0.28  | 1 | Cd4 Naive | Rasgrp1 |

**Supplemental Table 3: Genes in CD8 Ki67 Cells**

| <b>p_val</b> | <b>avg_logFC</b> | <b>pct.1</b> | <b>pct.2</b> | <b>p_val_adj</b> | <b>cluster</b>  | <b>gene</b> |
|--------------|------------------|--------------|--------------|------------------|-----------------|-------------|
| 0            | 2.226404826      | 0.984        | 0.168        | 0                | Cd8 Hist+Mki67+ | Stmn1       |
| 0            | 2.042276388      | 0.85         | 0.118        | 0                | Cd8 Hist+Mki67+ | Ube2c       |
| 0            | 2.018374999      | 0.898        | 0.087        | 0                | Cd8 Hist+Mki67+ | Pclaf       |
| 0            | 1.919528595      | 0.956        | 0.066        | 0                | Cd8 Hist+Mki67+ | Birc5       |
| 0            | 1.832065923      | 1            | 0.693        | 0                | Cd8 Hist+Mki67+ | Hmgb2       |
| 0            | 1.757138676      | 0.839        | 0.232        | 0                | Cd8 Hist+Mki67+ | H2afx       |
| 0            | 1.692105305      | 0.987        | 0.679        | 0                | Cd8 Hist+Mki67+ | Tubb5       |
| 0            | 1.645811772      | 0.881        | 0.036        | 0                | Cd8 Hist+Mki67+ | Ccna2       |
| 0            | 1.607604129      | 0.932        | 0.359        | 0                | Cd8 Hist+Mki67+ | Tubb4b      |
| 0            | 1.54066455       | 0.833        | 0.063        | 0                | Cd8 Hist+Mki67+ | Ccnb2       |
| 0            | 1.533243178      | 0.773        | 0.107        | 0                | Cd8 Hist+Mki67+ | Top2a       |
| 0            | 1.500366711      | 0.658        | 0.049        | 0                | Cd8 Hist+Mki67+ | Rrm2        |
| 0            | 1.493902156      | 0.896        | 0.081        | 0                | Cd8 Hist+Mki67+ | Cks1b       |
| 0            | 1.485140699      | 0.857        | 0.243        | 0                | Cd8 Hist+Mki67+ | Cenpa       |
| 0            | 1.44394917       | 0.823        | 0.193        | 0                | Cd8 Hist+Mki67+ | Tuba1b      |
| 0            | 1.443169259      | 0.981        | 0.434        | 0                | Cd8 Hist+Mki67+ | Hmgn2       |
| 0            | 1.405580727      | 0.854        | 0.051        | 0                | Cd8 Hist+Mki67+ | Cdca8       |
| 0            | 1.280727426      | 0.646        | 0.024        | 0                | Cd8 Hist+Mki67+ | Cenpf       |
| 0            | 1.26413451       | 0.642        | 0.072        | 0                | Cd8 Hist+Mki67+ | Hist1h1b    |
| 0            | 1.257674313      | 0.644        | 0.029        | 0                | Cd8 Hist+Mki67+ | Cdc20       |
| 0            | 1.254685618      | 0.801        | 0.105        | 0                | Cd8 Hist+Mki67+ | Smc2        |
| 0            | 1.244398527      | 0.602        | 0.061        | 0                | Cd8 Hist+Mki67+ | Hist1h2ae   |
| 0            | 1.236947547      | 0.746        | 0.042        | 0                | Cd8 Hist+Mki67+ | Spc24       |
| 0            | 1.233131396      | 0.786        | 0.079        | 0                | Cd8 Hist+Mki67+ | Mki67       |
| 0            | 1.230052837      | 0.761        | 0.045        | 0                | Cd8 Hist+Mki67+ | Cdca3       |
| 0            | 1.217946925      | 0.688        | 0.036        | 0                | Cd8 Hist+Mki67+ | Cdk1        |
| 0            | 1.211229351      | 0.971        | 0.58         | 0                | Cd8 Hist+Mki67+ | H2afv       |
| 0            | 1.187149944      | 0.817        | 0.157        | 0                | Cd8 Hist+Mki67+ | Cks2        |
| 0            | 1.181433786      | 0.732        | 0.033        | 0                | Cd8 Hist+Mki67+ | Tpx2        |
| 0            | 1.149201703      | 1            | 0.81         | 0                | Cd8 Hist+Mki67+ | H2afz       |
| 0            | 1.147805325      | 0.614        | 0.021        | 0                | Cd8 Hist+Mki67+ | Nusap1      |
| 0            | 1.122361044      | 0.948        | 0.35         | 0                | Cd8 Hist+Mki67+ | Lmnb1       |
| 0            | 1.09936889       | 0.722        | 0.043        | 0                | Cd8 Hist+Mki67+ | Tacc3       |
| 0            | 1.07911283       | 0.674        | 0.056        | 0                | Cd8 Hist+Mki67+ | Asf1b       |
| 0            | 1.057777719      | 0.834        | 0.22         | 0                | Cd8 Hist+Mki67+ | Ube2s       |
| 0            | 1.057528306      | 0.775        | 0.118        | 0                | Cd8 Hist+Mki67+ | Racgap1     |

|   |             |       |       |   |                 |           |
|---|-------------|-------|-------|---|-----------------|-----------|
| 0 | 1.016265376 | 0.545 | 0.019 | 0 | Cd8 Hist+Mki67+ | Fbxo5     |
| 0 | 1.004696957 | 0.938 | 0.414 | 0 | Cd8 Hist+Mki67+ | Selenoh   |
| 0 | 1.001703088 | 0.989 | 0.691 | 0 | Cd8 Hist+Mki67+ | Ran       |
| 0 | 0.98190967  | 1     | 0.972 | 0 | Cd8 Hist+Mki67+ | Ptma      |
| 0 | 0.978433305 | 0.995 | 0.795 | 0 | Cd8 Hist+Mki67+ | Hmgb1     |
| 0 | 0.975042256 | 0.57  | 0.02  | 0 | Cd8 Hist+Mki67+ | Plk1      |
| 0 | 0.974320717 | 0.504 | 0.017 | 0 | Cd8 Hist+Mki67+ | Hist1h2ap |
| 0 | 0.973508561 | 0.608 | 0.059 | 0 | Cd8 Hist+Mki67+ | Tk1       |
| 0 | 0.967476083 | 0.6   | 0.033 | 0 | Cd8 Hist+Mki67+ | Aurkb     |
| 0 | 0.962010389 | 0.609 | 0.101 | 0 | Cd8 Hist+Mki67+ | Tyms      |
| 0 | 0.937943712 | 0.564 | 0.023 | 0 | Cd8 Hist+Mki67+ | Cenpe     |
| 0 | 0.92713987  | 0.797 | 0.231 | 0 | Cd8 Hist+Mki67+ | Tmpo      |
| 0 | 0.898812811 | 0.562 | 0.024 | 0 | Cd8 Hist+Mki67+ | Kif11     |
| 0 | 0.885976381 | 0.587 | 0.028 | 0 | Cd8 Hist+Mki67+ | Kif22     |
| 0 | 0.879122203 | 0.525 | 0.014 | 0 | Cd8 Hist+Mki67+ | Hmmr      |
| 0 | 0.873504728 | 0.659 | 0.11  | 0 | Cd8 Hist+Mki67+ | Incenp    |
| 0 | 0.851332981 | 0.494 | 0.027 | 0 | Cd8 Hist+Mki67+ | Ccnb1     |
| 0 | 0.84859698  | 0.518 | 0.031 | 0 | Cd8 Hist+Mki67+ | Cdkn3     |
| 0 | 0.833121165 | 0.529 | 0.042 | 0 | Cd8 Hist+Mki67+ | Prc1      |
| 0 | 0.825755351 | 0.627 | 0.091 | 0 | Cd8 Hist+Mki67+ | Cenpw     |
| 0 | 0.796295559 | 0.545 | 0.058 | 0 | Cd8 Hist+Mki67+ | Knstrn    |
| 0 | 0.783292154 | 0.505 | 0.015 | 0 | Cd8 Hist+Mki67+ | Ckap2l    |
| 0 | 0.774141167 | 0.519 | 0.015 | 0 | Cd8 Hist+Mki67+ | Kn1       |
| 0 | 0.768084176 | 0.529 | 0.091 | 0 | Cd8 Hist+Mki67+ | Tuba1c    |
| 0 | 0.766408551 | 0.578 | 0.105 | 0 | Cd8 Hist+Mki67+ | Reep4     |
| 0 | 0.74322366  | 0.461 | 0.055 | 0 | Cd8 Hist+Mki67+ | Gm4316    |
| 0 | 0.710340408 | 0.562 | 0.086 | 0 | Cd8 Hist+Mki67+ | Hmgb3     |
| 0 | 0.705463455 | 0.443 | 0.01  | 0 | Cd8 Hist+Mki67+ | Pimreg    |
| 0 | 0.704036692 | 0.41  | 0.009 | 0 | Cd8 Hist+Mki67+ | Esco2     |
| 0 | 0.701071991 | 0.553 | 0.097 | 0 | Cd8 Hist+Mki67+ | Rrm1      |
| 0 | 0.669431243 | 1     | 0.993 | 0 | Cd8 Hist+Mki67+ | Ppia      |
| 0 | 0.668304269 | 0.572 | 0.103 | 0 | Cd8 Hist+Mki67+ | Lockd     |
| 0 | 0.668290238 | 0.539 | 0.073 | 0 | Cd8 Hist+Mki67+ | Ccdc34    |
| 0 | 0.663686792 | 0.47  | 0.041 | 0 | Cd8 Hist+Mki67+ | Cenpm     |
| 0 | 0.661184618 | 0.459 | 0.032 | 0 | Cd8 Hist+Mki67+ | Kif23     |
| 0 | 0.659190512 | 0.501 | 0.049 | 0 | Cd8 Hist+Mki67+ | Mad2l1    |
| 0 | 0.653121062 | 0.434 | 0.016 | 0 | Cd8 Hist+Mki67+ | Cep55     |
| 0 | 0.643948282 | 0.557 | 0.106 | 0 | Cd8 Hist+Mki67+ | Dbf4      |
| 0 | 0.633998157 | 0.419 | 0.019 | 0 | Cd8 Hist+Mki67+ | Ndc80     |

|   |             |       |       |   |                 |          |
|---|-------------|-------|-------|---|-----------------|----------|
| 0 | 0.633554799 | 0.417 | 0.013 | 0 | Cd8 Hist+Mki67+ | Kif20a   |
| 0 | 0.633442218 | 0.383 | 0.025 | 0 | Cd8 Hist+Mki67+ | Clspn    |
| 0 | 0.625684189 | 0.436 | 0.028 | 0 | Cd8 Hist+Mki67+ | Dlgap5   |
| 0 | 0.615316004 | 0.388 | 0.054 | 0 | Cd8 Hist+Mki67+ | Tcf19    |
| 0 | 0.613671166 | 0.358 | 0.006 | 0 | Cd8 Hist+Mki67+ | Mxd3     |
| 0 | 0.600667825 | 0.502 | 0.088 | 0 | Cd8 Hist+Mki67+ | Pmf1     |
| 0 | 0.594738418 | 0.376 | 0.012 | 0 | Cd8 Hist+Mki67+ | Spc25    |
| 0 | 0.585273896 | 0.415 | 0.026 | 0 | Cd8 Hist+Mki67+ | Ncaph    |
| 0 | 0.581096387 | 0.367 | 0.024 | 0 | Cd8 Hist+Mki67+ | Rad51    |
| 0 | 0.580816342 | 0.397 | 0.017 | 0 | Cd8 Hist+Mki67+ | Cdca2    |
| 0 | 0.576968822 | 0.407 | 0.037 | 0 | Cd8 Hist+Mki67+ | Ncapd2   |
| 0 | 0.576318988 | 0.488 | 0.075 | 0 | Cd8 Hist+Mki67+ | Gm10282  |
| 0 | 0.572089327 | 0.381 | 0.012 | 0 | Cd8 Hist+Mki67+ | Bub1b    |
| 0 | 0.568663741 | 0.371 | 0.009 | 0 | Cd8 Hist+Mki67+ | Shcbp1   |
| 0 | 0.562149407 | 0.379 | 0.018 | 0 | Cd8 Hist+Mki67+ | Kifc1    |
| 0 | 0.554534105 | 0.336 | 0.014 | 0 | Cd8 Hist+Mki67+ | Aurka    |
| 0 | 0.549381154 | 0.394 | 0.021 | 0 | Cd8 Hist+Mki67+ | Ncapg    |
| 0 | 0.549176924 | 0.319 | 0.013 | 0 | Cd8 Hist+Mki67+ | Aspm     |
| 0 | 0.546228582 | 0.347 | 0.014 | 0 | Cd8 Hist+Mki67+ | Rad51ap1 |
| 0 | 0.545099107 | 0.377 | 0.032 | 0 | Cd8 Hist+Mki67+ | Kif20b   |
| 0 | 0.541994544 | 0.353 | 0.009 | 0 | Cd8 Hist+Mki67+ | Ska1     |
| 0 | 0.534191261 | 0.328 | 0.009 | 0 | Cd8 Hist+Mki67+ | Pbk      |
| 0 | 0.525210071 | 0.352 | 0.01  | 0 | Cd8 Hist+Mki67+ | Cdca5    |
| 0 | 0.52085337  | 0.354 | 0.014 | 0 | Cd8 Hist+Mki67+ | Cit      |
| 0 | 0.500530347 | 0.336 | 0.008 | 0 | Cd8 Hist+Mki67+ | Nuf2     |
| 0 | 0.496612573 | 0.341 | 0.01  | 0 | Cd8 Hist+Mki67+ | Sgo2a    |
| 0 | 0.490241104 | 0.309 | 0.011 | 0 | Cd8 Hist+Mki67+ | Ckap2    |
| 0 | 0.487117864 | 0.305 | 0.009 | 0 | Cd8 Hist+Mki67+ | Ccnf     |
| 0 | 0.482813011 | 0.364 | 0.042 | 0 | Cd8 Hist+Mki67+ | Kif15    |
| 0 | 0.479765145 | 0.306 | 0.011 | 0 | Cd8 Hist+Mki67+ | Depdc1a  |
| 0 | 0.471414785 | 0.3   | 0.007 | 0 | Cd8 Hist+Mki67+ | Neil3    |
| 0 | 0.467432273 | 0.306 | 0.009 | 0 | Cd8 Hist+Mki67+ | Sapcd2   |
| 0 | 0.460417234 | 0.331 | 0.021 | 0 | Cd8 Hist+Mki67+ | Diaph3   |
| 0 | 0.45270596  | 0.329 | 0.036 | 0 | Cd8 Hist+Mki67+ | Ube2t    |
| 0 | 0.452650123 | 0.3   | 0.008 | 0 | Cd8 Hist+Mki67+ | Kif2c    |
| 0 | 0.446378669 | 0.275 | 0.011 | 0 | Cd8 Hist+Mki67+ | Mis18bp1 |
| 0 | 0.434583762 | 0.334 | 0.036 | 0 | Cd8 Hist+Mki67+ | Ska2     |
| 0 | 0.434217934 | 0.267 | 0.008 | 0 | Cd8 Hist+Mki67+ | Nek2     |
| 0 | 0.42491107  | 0.316 | 0.019 | 0 | Cd8 Hist+Mki67+ | Poc1a    |

|           |             |       |       |           |                 |           |
|-----------|-------------|-------|-------|-----------|-----------------|-----------|
| 0         | 0.411354452 | 0.279 | 0.007 | 0         | Cd8 Hist+Mki67+ | Parpbbp   |
| 0         | 0.408869493 | 0.324 | 0.035 | 0         | Cd8 Hist+Mki67+ | Plk4      |
| 0         | 0.402313878 | 0.271 | 0.009 | 0         | Cd8 Hist+Mki67+ | Kif4      |
| 0         | 0.36114325  | 0.258 | 0.009 | 0         | Cd8 Hist+Mki67+ | Gtse1     |
| 1.34E-305 | 0.718178702 | 0.55  | 0.112 | 2.15E-301 | Cd8 Hist+Mki67+ | Nrm       |
| 1.45E-304 | 0.576820507 | 0.5   | 0.09  | 2.32E-300 | Cd8 Hist+Mki67+ | Rfc5      |
| 6.80E-292 | 0.401738349 | 0.263 | 0.026 | 1.09E-287 | Cd8 Hist+Mki67+ | Hist1h2bj |
| 6.42E-290 | 0.693641071 | 0.568 | 0.123 | 1.03E-285 | Cd8 Hist+Mki67+ | Ezh2      |
| 6.94E-288 | 0.442243046 | 0.339 | 0.044 | 1.11E-283 | Cd8 Hist+Mki67+ | Gpsm2     |
| 5.79E-278 | 0.69630767  | 0.441 | 0.079 | 9.28E-274 | Cd8 Hist+Mki67+ | Kpna2     |
| 1.94E-273 | 0.733043367 | 0.74  | 0.22  | 3.10E-269 | Cd8 Hist+Mki67+ | Lsm2      |
| 2.56E-267 | 0.598552325 | 0.515 | 0.107 | 4.10E-263 | Cd8 Hist+Mki67+ | Fen1      |
| 5.53E-267 | 0.818069473 | 0.807 | 0.282 | 8.87E-263 | Cd8 Hist+Mki67+ | Anp32e    |
| 8.34E-264 | 0.499710288 | 0.345 | 0.05  | 1.34E-259 | Cd8 Hist+Mki67+ | Uhrf1     |
| 5.27E-263 | 0.370764061 | 0.289 | 0.035 | 8.45E-259 | Cd8 Hist+Mki67+ | Cenpl     |
| 1.69E-262 | 0.412516178 | 0.323 | 0.044 | 2.72E-258 | Cd8 Hist+Mki67+ | Rcc1      |
| 3.69E-262 | 0.808649196 | 0.603 | 0.156 | 5.92E-258 | Cd8 Hist+Mki67+ | Gm42031   |
| 6.67E-259 | 0.96711515  | 0.829 | 0.323 | 1.07E-254 | Cd8 Hist+Mki67+ | Dut       |
| 4.70E-258 | 0.655492672 | 0.598 | 0.148 | 7.54E-254 | Cd8 Hist+Mki67+ | Nucks1    |
| 3.64E-255 | 0.534963514 | 0.273 | 0.032 | 5.84E-251 | Cd8 Hist+Mki67+ | Hist1h1d  |
| 5.14E-255 | 0.681003154 | 0.607 | 0.153 | 8.24E-251 | Cd8 Hist+Mki67+ | Gmnn      |
| 9.48E-253 | 0.580699009 | 0.528 | 0.115 | 1.52E-248 | Cd8 Hist+Mki67+ | Haus4     |
| 4.24E-250 | 0.628037184 | 0.522 | 0.116 | 6.80E-246 | Cd8 Hist+Mki67+ | Mcm7      |
| 4.13E-247 | 0.963827635 | 0.63  | 0.177 | 6.62E-243 | Cd8 Hist+Mki67+ | Hist1h1e  |
| 1.21E-245 | 0.882127925 | 0.907 | 0.437 | 1.93E-241 | Cd8 Hist+Mki67+ | Smc4      |
| 1.38E-244 | 0.466289384 | 0.39  | 0.067 | 2.22E-240 | Cd8 Hist+Mki67+ | Rfc4      |
| 1.71E-242 | 0.544331761 | 0.334 | 0.05  | 2.75E-238 | Cd8 Hist+Mki67+ | Hist1h3e  |
| 1.58E-239 | 0.618914545 | 0.476 | 0.101 | 2.53E-235 | Cd8 Hist+Mki67+ | Lig1      |
| 1.36E-237 | 0.421661669 | 0.379 | 0.064 | 2.18E-233 | Cd8 Hist+Mki67+ | Hjurp     |
| 2.80E-233 | 0.589198746 | 0.489 | 0.108 | 4.49E-229 | Cd8 Hist+Mki67+ | Mcm5      |
| 3.77E-231 | 0.721337491 | 0.762 | 0.262 | 6.05E-227 | Cd8 Hist+Mki67+ | Rad21     |
| 2.01E-230 | 0.537116069 | 0.467 | 0.099 | 3.22E-226 | Cd8 Hist+Mki67+ | Ckap5     |
| 5.87E-229 | 0.561468872 | 0.527 | 0.125 | 9.41E-225 | Cd8 Hist+Mki67+ | Cmc2      |
| 2.89E-222 | 0.779348615 | 0.975 | 0.702 | 4.62E-218 | Cd8 Hist+Mki67+ | Anp32b    |
| 6.83E-222 | 0.896618589 | 0.891 | 0.462 | 1.09E-217 | Cd8 Hist+Mki67+ | Dek       |
| 1.25E-220 | 0.663271871 | 0.686 | 0.213 | 2.00E-216 | Cd8 Hist+Mki67+ | Fkbp2     |
| 8.75E-219 | 0.412336153 | 0.324 | 0.052 | 1.40E-214 | Cd8 Hist+Mki67+ | Prim1     |
| 8.91E-217 | 0.416407389 | 0.36  | 0.063 | 1.43E-212 | Cd8 Hist+Mki67+ | Mns1      |
| 3.13E-216 | 0.367521109 | 0.314 | 0.049 | 5.02E-212 | Cd8 Hist+Mki67+ | Pkmyt1    |

|           |             |       |       |           |                 |               |
|-----------|-------------|-------|-------|-----------|-----------------|---------------|
| 6.65E-212 | 0.537694981 | 0.522 | 0.128 | 1.07E-207 | Cd8 Hist+Mki67+ | Rdm1          |
| 9.73E-210 | 0.738500956 | 0.924 | 0.486 | 1.56E-205 | Cd8 Hist+Mki67+ | Banf1         |
| 6.51E-207 | 0.528232471 | 0.566 | 0.15  | 1.04E-202 | Cd8 Hist+Mki67+ | Rangap1       |
| 4.68E-206 | 0.658105905 | 0.517 | 0.131 | 7.50E-202 | Cd8 Hist+Mki67+ | Cdc25b        |
| 7.00E-203 | 0.553367134 | 0.647 | 0.194 | 1.12E-198 | Cd8 Hist+Mki67+ | Lsm3          |
| 8.67E-195 | 0.447845719 | 0.364 | 0.071 | 1.39E-190 | Cd8 Hist+Mki67+ | Hist1h4d      |
| 6.35E-192 | 0.57587122  | 0.549 | 0.155 | 1.02E-187 | Cd8 Hist+Mki67+ | Tipin         |
| 3.67E-191 | 0.508632333 | 0.999 | 0.933 | 5.88E-187 | Cd8 Hist+Mki67+ | Rbm3          |
| 1.69E-190 | 0.518009648 | 0.998 | 0.937 | 2.71E-186 | Cd8 Hist+Mki67+ | Clic1         |
| 6.49E-186 | 0.559112262 | 0.996 | 0.896 | 1.04E-181 | Cd8 Hist+Mki67+ | Hnrnpa2b1     |
| 5.11E-184 | 0.646354387 | 0.993 | 0.821 | 8.19E-180 | Cd8 Hist+Mki67+ | Hnrnpa3       |
| 3.51E-183 | 0.402967728 | 0.379 | 0.079 | 5.62E-179 | Cd8 Hist+Mki67+ | Tubg1         |
| 1.18E-182 | 0.904424392 | 0.687 | 0.248 | 1.90E-178 | Cd8 Hist+Mki67+ | Gzmk          |
| 3.71E-180 | 0.44953297  | 0.472 | 0.119 | 5.95E-176 | Cd8 Hist+Mki67+ | Rnaseh2b      |
| 2.54E-169 | 0.488984547 | 0.408 | 0.098 | 4.07E-165 | Cd8 Hist+Mki67+ | Cdkn2c        |
| 7.70E-168 | 0.663933964 | 0.875 | 0.463 | 1.23E-163 | Cd8 Hist+Mki67+ | Dbi           |
| 1.66E-165 | 0.468034335 | 0.482 | 0.131 | 2.66E-161 | Cd8 Hist+Mki67+ | Nasp          |
| 5.66E-165 | 0.595507313 | 0.76  | 0.309 | 9.07E-161 | Cd8 Hist+Mki67+ | Ddx39         |
| 1.58E-163 | 0.625250716 | 0.967 | 0.69  | 2.54E-159 | Cd8 Hist+Mki67+ | Txn1          |
| 6.60E-163 | 0.503026564 | 0.551 | 0.169 | 1.06E-158 | Cd8 Hist+Mki67+ | Ncaph2        |
| 1.78E-162 | 0.365881497 | 0.373 | 0.084 | 2.85E-158 | Cd8 Hist+Mki67+ | Anapc15       |
| 3.86E-158 | 0.515205043 | 0.498 | 0.144 | 6.19E-154 | Cd8 Hist+Mki67+ | Mcm3          |
| 5.46E-157 | 0.414585973 | 0.388 | 0.093 | 8.74E-153 | Cd8 Hist+Mki67+ | Hells         |
| 1.01E-156 | 0.428262249 | 0.353 | 0.081 | 1.63E-152 | Cd8 Hist+Mki67+ | Orc6          |
| 4.45E-156 | 0.361201732 | 0.311 | 0.063 | 7.14E-152 | Cd8 Hist+Mki67+ | Ncapd3        |
| 5.26E-155 | 0.577105994 | 0.755 | 0.324 | 8.43E-151 | Cd8 Hist+Mki67+ | Lsm5          |
| 1.82E-154 | 0.636324343 | 0.829 | 0.413 | 2.91E-150 | Cd8 Hist+Mki67+ | Snrpd1        |
| 3.48E-150 | 0.566169003 | 0.688 | 0.274 | 5.58E-146 | Cd8 Hist+Mki67+ | Anapc5        |
| 2.04E-149 | 0.384730571 | 0.363 | 0.086 | 3.27E-145 | Cd8 Hist+Mki67+ | Tmem97        |
| 8.04E-147 | 0.682686369 | 0.896 | 0.539 | 1.29E-142 | Cd8 Hist+Mki67+ | Hnrnpab       |
| 1.21E-143 | 0.463154769 | 0.483 | 0.146 | 1.94E-139 | Cd8 Hist+Mki67+ | Rpa3          |
| 2.35E-143 | 0.384150496 | 0.362 | 0.088 | 3.77E-139 | Cd8 Hist+Mki67+ | Alyref        |
| 6.36E-142 | 0.583613864 | 0.928 | 0.595 | 1.02E-137 | Cd8 Hist+Mki67+ | Calm3         |
| 6.90E-140 | 0.470347896 | 0.525 | 0.169 | 1.11E-135 | Cd8 Hist+Mki67+ | Fzr1          |
| 5.61E-139 | 0.399649774 | 0.419 | 0.114 | 9.00E-135 | Cd8 Hist+Mki67+ | Mis18a        |
| 2.07E-138 | 0.645354909 | 0.839 | 0.456 | 3.32E-134 | Cd8 Hist+Mki67+ | Nap111        |
| 1.85E-135 | 0.557074692 | 0.697 | 0.292 | 2.97E-131 | Cd8 Hist+Mki67+ | Dnajc9        |
| 6.59E-135 | 0.368133544 | 0.309 | 0.07  | 1.06E-130 | Cd8 Hist+Mki67+ | 1500009L16Rik |
| 2.05E-134 | 0.29910714  | 0.283 | 0.059 | 3.29E-130 | Cd8 Hist+Mki67+ | Nup37         |

|           |             |       |       |           |                 |          |
|-----------|-------------|-------|-------|-----------|-----------------|----------|
| 7.98E-134 | 0.474690965 | 0.567 | 0.197 | 1.28E-129 | Cd8 Hist+Mki67+ | Nde1     |
| 1.12E-130 | 0.542748348 | 0.819 | 0.403 | 1.80E-126 | Cd8 Hist+Mki67+ | Srsf7    |
| 9.77E-129 | 0.505548828 | 0.723 | 0.312 | 1.57E-124 | Cd8 Hist+Mki67+ | Exosc8   |
| 9.97E-129 | 0.479149001 | 0.975 | 0.811 | 1.60E-124 | Cd8 Hist+Mki67+ | Hint1    |
| 1.03E-124 | 0.521105176 | 0.686 | 0.289 | 1.65E-120 | Cd8 Hist+Mki67+ | Smc1a    |
| 6.80E-124 | 0.552030408 | 0.892 | 0.515 | 1.09E-119 | Cd8 Hist+Mki67+ | Srsf3    |
| 1.26E-122 | 0.515382524 | 0.834 | 0.437 | 2.01E-118 | Cd8 Hist+Mki67+ | Atpif1   |
| 6.20E-122 | 0.374402085 | 0.4   | 0.116 | 9.94E-118 | Cd8 Hist+Mki67+ | Hmgn5    |
| 2.30E-121 | 0.538269252 | 0.938 | 0.662 | 3.69E-117 | Cd8 Hist+Mki67+ | Ywhah    |
| 7.96E-120 | 0.547855246 | 0.882 | 0.522 | 1.28E-115 | Cd8 Hist+Mki67+ | Srsf2    |
| 3.34E-117 | 0.577726555 | 0.934 | 0.693 | 5.35E-113 | Cd8 Hist+Mki67+ | Jpt1     |
| 1.10E-115 | 0.395178737 | 0.998 | 0.928 | 1.76E-111 | Cd8 Hist+Mki67+ | Calm1    |
| 6.50E-115 | 0.419111685 | 0.459 | 0.153 | 1.04E-110 | Cd8 Hist+Mki67+ | Tfdp1    |
| 1.31E-114 | 0.52873961  | 0.938 | 0.626 | 2.11E-110 | Cd8 Hist+Mki67+ | Hsp90b1  |
| 4.49E-113 | 0.352810387 | 0.416 | 0.128 | 7.19E-109 | Cd8 Hist+Mki67+ | Psat1    |
| 2.15E-112 | 0.510475246 | 0.811 | 0.436 | 3.45E-108 | Cd8 Hist+Mki67+ | Anapc11  |
| 1.47E-111 | 0.429785261 | 0.533 | 0.196 | 2.36E-107 | Cd8 Hist+Mki67+ | Arsb     |
| 1.33E-110 | 0.450556792 | 0.566 | 0.222 | 2.13E-106 | Cd8 Hist+Mki67+ | Hpf1     |
| 5.42E-110 | 0.444234333 | 0.657 | 0.275 | 8.69E-106 | Cd8 Hist+Mki67+ | Csrp1    |
| 5.76E-110 | 0.472684772 | 0.659 | 0.286 | 9.24E-106 | Cd8 Hist+Mki67+ | Phgdh    |
| 4.72E-109 | 0.265007136 | 0.261 | 0.06  | 7.57E-105 | Cd8 Hist+Mki67+ | Cbx5     |
| 1.28E-107 | 0.513689114 | 0.953 | 0.726 | 2.06E-103 | Cd8 Hist+Mki67+ | Emp3     |
| 3.63E-107 | 0.402078331 | 0.556 | 0.212 | 5.81E-103 | Cd8 Hist+Mki67+ | Sdf2l1   |
| 4.42E-107 | 0.752344533 | 0.972 | 0.847 | 7.09E-103 | Cd8 Hist+Mki67+ | Arl6ip1  |
| 3.88E-105 | 0.451585692 | 0.45  | 0.158 | 6.22E-101 | Cd8 Hist+Mki67+ | Pcna     |
| 4.56E-105 | 0.449800785 | 0.569 | 0.228 | 7.30E-101 | Cd8 Hist+Mki67+ | Usp1     |
| 5.65E-105 | 0.47772367  | 0.869 | 0.51  | 9.05E-101 | Cd8 Hist+Mki67+ | Nudt21   |
| 2.17E-103 | 0.283992027 | 0.262 | 0.063 | 3.47E-99  | Cd8 Hist+Mki67+ | Pold1    |
| 4.12E-103 | 0.463588114 | 0.745 | 0.371 | 6.60E-99  | Cd8 Hist+Mki67+ | Gclm     |
| 1.45E-102 | 0.613765495 | 0.706 | 0.371 | 2.33E-98  | Cd8 Hist+Mki67+ | Slbp     |
| 4.34E-102 | 0.268608588 | 0.3   | 0.078 | 6.96E-98  | Cd8 Hist+Mki67+ | Nup85    |
| 7.86E-102 | 0.401053447 | 0.458 | 0.159 | 1.26E-97  | Cd8 Hist+Mki67+ | Trim59   |
| 1.72E-101 | 0.285966063 | 0.306 | 0.082 | 2.75E-97  | Cd8 Hist+Mki67+ | Ppih     |
| 1.94E-101 | 0.540731782 | 0.72  | 0.375 | 3.11E-97  | Cd8 Hist+Mki67+ | Bub3     |
| 6.19E-99  | 0.490460095 | 0.927 | 0.656 | 9.92E-95  | Cd8 Hist+Mki67+ | Prdx1    |
| 7.26E-99  | 0.430092269 | 0.693 | 0.321 | 1.16E-94  | Cd8 Hist+Mki67+ | Rnaseh2c |
| 2.33E-98  | 0.529424718 | 0.831 | 0.444 | 3.74E-94  | Cd8 Hist+Mki67+ | Cd8a     |
| 2.59E-98  | 0.420443352 | 0.65  | 0.286 | 4.15E-94  | Cd8 Hist+Mki67+ | Cbx1     |
| 1.02E-97  | 0.301367122 | 0.271 | 0.069 | 1.64E-93  | Cd8 Hist+Mki67+ | Rfc3     |

|          |             |       |       |          |                 |               |
|----------|-------------|-------|-------|----------|-----------------|---------------|
| 1.09E-97 | 0.372813711 | 0.447 | 0.157 | 1.74E-93 | Cd8 Hist+Mki67+ | Nelfe         |
| 2.78E-97 | 0.419675036 | 0.528 | 0.209 | 4.45E-93 | Cd8 Hist+Mki67+ | Cdca4         |
| 3.36E-97 | 0.401584337 | 0.981 | 0.82  | 5.38E-93 | Cd8 Hist+Mki67+ | Cox5b         |
| 4.27E-97 | 0.333576127 | 0.341 | 0.101 | 6.85E-93 | Cd8 Hist+Mki67+ | Nsd2          |
| 1.26E-96 | 0.301155362 | 0.352 | 0.106 | 2.02E-92 | Cd8 Hist+Mki67+ | Lmf2          |
| 3.12E-96 | 0.415072564 | 0.51  | 0.196 | 5.00E-92 | Cd8 Hist+Mki67+ | Dctpp1        |
| 4.68E-96 | 0.330511548 | 0.413 | 0.137 | 7.51E-92 | Cd8 Hist+Mki67+ | Pih1d1        |
| 3.82E-95 | 0.250486204 | 0.29  | 0.077 | 6.12E-91 | Cd8 Hist+Mki67+ | Rbbp8         |
| 5.40E-95 | 0.580716122 | 0.852 | 0.596 | 8.65E-91 | Cd8 Hist+Mki67+ | Calm2         |
| 1.87E-92 | 0.253284396 | 0.285 | 0.076 | 3.00E-88 | Cd8 Hist+Mki67+ | Odf2          |
| 1.19E-91 | 0.42967108  | 0.943 | 0.742 | 1.91E-87 | Cd8 Hist+Mki67+ | Snrpe         |
| 1.43E-91 | 0.385007777 | 0.659 | 0.292 | 2.30E-87 | Cd8 Hist+Mki67+ | Lbr           |
| 1.83E-91 | 0.31027967  | 0.354 | 0.11  | 2.94E-87 | Cd8 Hist+Mki67+ | Atad2         |
| 1.85E-91 | 0.397091143 | 0.262 | 0.069 | 2.96E-87 | Cd8 Hist+Mki67+ | Hist1h1c      |
| 1.88E-91 | 0.471045845 | 0.965 | 0.808 | 3.01E-87 | Cd8 Hist+Mki67+ | Tagln2        |
| 2.87E-90 | 0.473122077 | 0.909 | 0.612 | 4.60E-86 | Cd8 Hist+Mki67+ | Cmtm7         |
| 1.10E-89 | 0.392295722 | 0.626 | 0.275 | 1.76E-85 | Cd8 Hist+Mki67+ | Hdgf          |
| 1.41E-89 | 0.253807907 | 0.328 | 0.097 | 2.26E-85 | Cd8 Hist+Mki67+ | Oat           |
| 2.49E-89 | 0.451709619 | 0.478 | 0.194 | 3.99E-85 | Cd8 Hist+Mki67+ | Siva1         |
| 2.96E-89 | 0.305869839 | 0.296 | 0.085 | 4.74E-85 | Cd8 Hist+Mki67+ | Sap30         |
| 3.44E-89 | 0.326052586 | 0.466 | 0.171 | 5.51E-85 | Cd8 Hist+Mki67+ | Ilf2          |
| 3.90E-89 | 0.409162946 | 0.542 | 0.225 | 6.25E-85 | Cd8 Hist+Mki67+ | Rpa2          |
| 5.76E-89 | 0.333345498 | 0.492 | 0.187 | 9.24E-85 | Cd8 Hist+Mki67+ | Pbdc1         |
| 7.95E-89 | 0.383618987 | 0.506 | 0.201 | 1.27E-84 | Cd8 Hist+Mki67+ | Ranbp1        |
| 4.23E-88 | 0.415804618 | 0.485 | 0.192 | 6.78E-84 | Cd8 Hist+Mki67+ | Dnmt1         |
| 2.01E-87 | 0.411297743 | 0.972 | 0.792 | 3.23E-83 | Cd8 Hist+Mki67+ | Cox5a         |
| 2.30E-86 | 0.351302036 | 0.492 | 0.193 | 3.68E-82 | Cd8 Hist+Mki67+ | Nxt1          |
| 6.60E-85 | 0.337743637 | 0.982 | 0.871 | 1.06E-80 | Cd8 Hist+Mki67+ | Elob          |
| 1.81E-84 | 0.275153094 | 0.323 | 0.099 | 2.89E-80 | Cd8 Hist+Mki67+ | Agfg2         |
| 4.61E-84 | 0.341594905 | 0.305 | 0.093 | 7.39E-80 | Cd8 Hist+Mki67+ | 1700097N02Rik |
| 5.64E-84 | 0.323885406 | 0.4   | 0.141 | 9.05E-80 | Cd8 Hist+Mki67+ | Hat1          |
| 7.13E-84 | 0.264470422 | 0.324 | 0.1   | 1.14E-79 | Cd8 Hist+Mki67+ | Rhno1         |
| 1.33E-83 | 0.406843586 | 0.778 | 0.426 | 2.14E-79 | Cd8 Hist+Mki67+ | Mapre1        |
| 2.12E-83 | 0.367263219 | 0.636 | 0.292 | 3.40E-79 | Cd8 Hist+Mki67+ | Med30         |
| 7.09E-83 | 0.505510293 | 0.612 | 0.3   | 1.14E-78 | Cd8 Hist+Mki67+ | Cdkn2d        |
| 1.46E-82 | 0.526973586 | 0.752 | 0.427 | 2.34E-78 | Cd8 Hist+Mki67+ | Dap           |
| 1.00E-81 | 0.340995211 | 0.472 | 0.185 | 1.61E-77 | Cd8 Hist+Mki67+ | Mthfd2        |
| 3.09E-81 | 0.395150415 | 0.709 | 0.356 | 4.96E-77 | Cd8 Hist+Mki67+ | Dazap1        |
| 6.32E-81 | 0.344625246 | 0.462 | 0.181 | 1.01E-76 | Cd8 Hist+Mki67+ | Tuba4a        |



|          |             |       |       |          |                 |               |
|----------|-------------|-------|-------|----------|-----------------|---------------|
| 2.29E-80 | 0.35990094  | 0.961 | 0.785 | 3.67E-76 | Cd8 Hist+Mki67+ | Atp5j         |
| 6.53E-80 | 0.351009086 | 0.473 | 0.19  | 1.05E-75 | Cd8 Hist+Mki67+ | Dtymk         |
| 1.30E-79 | 0.391166131 | 0.945 | 0.721 | 2.08E-75 | Cd8 Hist+Mki67+ | Cox7a2        |
| 2.82E-79 | 0.400270834 | 0.873 | 0.559 | 4.53E-75 | Cd8 Hist+Mki67+ | Lsm4          |
| 4.89E-79 | 0.442280511 | 0.701 | 0.372 | 7.83E-75 | Cd8 Hist+Mki67+ | Rbbp7         |
| 6.35E-79 | 0.398908723 | 0.711 | 0.373 | 1.02E-74 | Cd8 Hist+Mki67+ | Lsm6          |
| 4.47E-78 | 0.388864477 | 0.767 | 0.426 | 7.16E-74 | Cd8 Hist+Mki67+ | Plp2          |
| 5.24E-78 | 0.355388491 | 0.609 | 0.28  | 8.39E-74 | Cd8 Hist+Mki67+ | Sae1          |
| 5.37E-78 | 0.374811312 | 0.97  | 0.863 | 8.61E-74 | Cd8 Hist+Mki67+ | Sumo2         |
| 5.44E-78 | 0.312581976 | 0.432 | 0.164 | 8.71E-74 | Cd8 Hist+Mki67+ | Cep57         |
| 6.53E-78 | 0.260436807 | 0.317 | 0.101 | 1.05E-73 | Cd8 Hist+Mki67+ | Mcm2          |
| 1.99E-77 | 0.362751142 | 0.982 | 0.837 | 3.19E-73 | Cd8 Hist+Mki67+ | Ybx1          |
| 3.15E-77 | 0.44638015  | 0.657 | 0.327 | 5.06E-73 | Cd8 Hist+Mki67+ | Hp1bp3        |
| 5.95E-77 | 0.398568303 | 0.833 | 0.502 | 9.54E-73 | Cd8 Hist+Mki67+ | Gltp          |
| 2.67E-76 | 0.396177192 | 0.658 | 0.335 | 4.28E-72 | Cd8 Hist+Mki67+ | Cenpx         |
| 3.80E-76 | 0.420796239 | 0.739 | 0.408 | 6.08E-72 | Cd8 Hist+Mki67+ | Ssrp1         |
| 3.11E-75 | 0.456938445 | 0.853 | 0.551 | 4.98E-71 | Cd8 Hist+Mki67+ | Hsp90aa1      |
| 2.17E-73 | 0.411801159 | 0.987 | 0.898 | 3.47E-69 | Cd8 Hist+Mki67+ | Crip1         |
| 2.41E-73 | 0.276244021 | 0.347 | 0.119 | 3.86E-69 | Cd8 Hist+Mki67+ | Miip          |
| 3.21E-73 | 0.414140389 | 0.772 | 0.452 | 5.14E-69 | Cd8 Hist+Mki67+ | Mrpl18        |
| 4.75E-73 | 0.445548997 | 0.842 | 0.492 | 7.61E-69 | Cd8 Hist+Mki67+ | Cd8b1         |
| 7.25E-73 | 0.321007312 | 0.5   | 0.211 | 1.16E-68 | Cd8 Hist+Mki67+ | Ubl4a         |
| 3.34E-72 | 0.317856855 | 0.462 | 0.19  | 5.35E-68 | Cd8 Hist+Mki67+ | Ppil1         |
| 6.51E-72 | 0.298071412 | 0.381 | 0.144 | 1.04E-67 | Cd8 Hist+Mki67+ | Nup62         |
| 9.67E-72 | 0.388816742 | 0.955 | 0.709 | 1.55E-67 | Cd8 Hist+Mki67+ | Anxa2         |
| 1.77E-71 | 0.277596505 | 0.392 | 0.145 | 2.83E-67 | Cd8 Hist+Mki67+ | A430005L14Rik |
| 2.31E-71 | 0.349093657 | 0.603 | 0.29  | 3.70E-67 | Cd8 Hist+Mki67+ | Nubp1         |
| 3.13E-70 | 0.510601971 | 0.436 | 0.184 | 5.01E-66 | Cd8 Hist+Mki67+ | Trgv2         |
| 3.14E-68 | 0.288098451 | 0.458 | 0.189 | 5.04E-64 | Cd8 Hist+Mki67+ | Pcbd2         |
| 3.16E-68 | 0.288035377 | 0.334 | 0.119 | 5.07E-64 | Cd8 Hist+Mki67+ | Slc29a1       |
| 3.46E-68 | 0.394851638 | 0.698 | 0.377 | 5.55E-64 | Cd8 Hist+Mki67+ | Cdk4          |
| 1.75E-67 | 0.376493329 | 0.749 | 0.425 | 2.80E-63 | Cd8 Hist+Mki67+ | U2af1         |
| 2.76E-67 | 0.322663231 | 0.591 | 0.277 | 4.42E-63 | Cd8 Hist+Mki67+ | Impdh2        |
| 5.09E-67 | 0.316669335 | 0.978 | 0.853 | 8.16E-63 | Cd8 Hist+Mki67+ | Hnrnpf        |
| 5.66E-67 | 0.344591793 | 0.775 | 0.439 | 9.07E-63 | Cd8 Hist+Mki67+ | Hnrnpdl       |
| 5.70E-67 | 0.281481632 | 0.348 | 0.128 | 9.13E-63 | Cd8 Hist+Mki67+ | Pold2         |
| 7.52E-67 | 0.380352415 | 0.882 | 0.611 | 1.21E-62 | Cd8 Hist+Mki67+ | Sec11c        |
| 8.87E-67 | 0.250708133 | 1     | 0.992 | 1.42E-62 | Cd8 Hist+Mki67+ | Pfn1          |
| 1.10E-66 | 0.276199989 | 0.993 | 0.938 | 1.76E-62 | Cd8 Hist+Mki67+ | Cox8a         |

|          |             |       |       |          |                 |               |
|----------|-------------|-------|-------|----------|-----------------|---------------|
| 2.22E-66 | 0.276316979 | 0.329 | 0.119 | 3.57E-62 | Cd8 Hist+Mki67+ | Magohb        |
| 4.15E-66 | 0.270779023 | 0.369 | 0.138 | 6.65E-62 | Cd8 Hist+Mki67+ | Nudt4         |
| 5.17E-66 | 0.328192558 | 0.518 | 0.236 | 8.29E-62 | Cd8 Hist+Mki67+ | Smc3          |
| 1.68E-65 | 0.322328962 | 0.539 | 0.248 | 2.69E-61 | Cd8 Hist+Mki67+ | Stard3nl      |
| 1.81E-65 | 0.430785859 | 0.862 | 0.608 | 2.90E-61 | Cd8 Hist+Mki67+ | 1810037117Rik |
| 3.37E-65 | 0.313571908 | 0.521 | 0.234 | 5.41E-61 | Cd8 Hist+Mki67+ | Rfc2          |
| 8.84E-65 | 0.315077527 | 0.528 | 0.24  | 1.42E-60 | Cd8 Hist+Mki67+ | Nutf2         |
| 1.30E-64 | 0.366660449 | 0.72  | 0.398 | 2.08E-60 | Cd8 Hist+Mki67+ | Acadl         |
| 3.12E-64 | 0.290620959 | 0.403 | 0.161 | 4.99E-60 | Cd8 Hist+Mki67+ | Ccng2         |
| 1.03E-63 | 0.339279232 | 0.944 | 0.716 | 1.65E-59 | Cd8 Hist+Mki67+ | Cox6a1        |
| 1.07E-63 | 0.313883001 | 0.613 | 0.301 | 1.71E-59 | Cd8 Hist+Mki67+ | Magoh         |
| 1.13E-63 | 0.260963993 | 0.352 | 0.133 | 1.81E-59 | Cd8 Hist+Mki67+ | Larp7         |
| 1.61E-63 | 0.322073924 | 0.987 | 0.871 | 2.57E-59 | Cd8 Hist+Mki67+ | Atp5g3        |
| 1.63E-63 | 0.360943506 | 0.903 | 0.657 | 2.62E-59 | Cd8 Hist+Mki67+ | Raly          |
| 3.48E-63 | 0.271687832 | 0.3   | 0.106 | 5.57E-59 | Cd8 Hist+Mki67+ | Eri1          |
| 6.35E-62 | 0.362427445 | 0.547 | 0.263 | 1.02E-57 | Cd8 Hist+Mki67+ | Acsl5         |
| 2.63E-61 | 0.262654196 | 0.404 | 0.166 | 4.21E-57 | Cd8 Hist+Mki67+ | Tceal9        |
| 4.57E-61 | 0.379817036 | 0.607 | 0.316 | 7.33E-57 | Cd8 Hist+Mki67+ | Mcm6          |
| 4.66E-61 | 0.331099297 | 0.667 | 0.353 | 7.47E-57 | Cd8 Hist+Mki67+ | Ssna1         |
| 9.38E-61 | 0.304745848 | 0.522 | 0.245 | 1.50E-56 | Cd8 Hist+Mki67+ | Dpy30         |
| 1.87E-60 | 0.292335567 | 0.498 | 0.229 | 3.00E-56 | Cd8 Hist+Mki67+ | CAA01147332.1 |
| 8.45E-60 | 0.295476304 | 0.585 | 0.286 | 1.35E-55 | Cd8 Hist+Mki67+ | Idh3a         |
| 1.71E-59 | 0.272701109 | 0.466 | 0.206 | 2.75E-55 | Cd8 Hist+Mki67+ | Hnrnpd        |
| 4.18E-59 | 0.259282457 | 0.367 | 0.147 | 6.70E-55 | Cd8 Hist+Mki67+ | Creld2        |
| 6.07E-59 | 0.292317745 | 0.564 | 0.275 | 9.73E-55 | Cd8 Hist+Mki67+ | Preli3b       |
| 7.27E-59 | 0.314861071 | 0.637 | 0.329 | 1.17E-54 | Cd8 Hist+Mki67+ | Nudc          |
| 4.49E-58 | 0.321207859 | 0.996 | 0.887 | 7.19E-54 | Cd8 Hist+Mki67+ | Lgals1        |
| 9.18E-58 | 0.283047366 | 0.475 | 0.213 | 1.47E-53 | Cd8 Hist+Mki67+ | Nt5c3b        |
| 1.37E-57 | 0.323804364 | 0.977 | 0.815 | 2.20E-53 | Cd8 Hist+Mki67+ | Sub1          |
| 5.23E-57 | 0.276165411 | 0.505 | 0.234 | 8.39E-53 | Cd8 Hist+Mki67+ | Maz           |
| 7.91E-57 | 0.270854615 | 0.502 | 0.233 | 1.27E-52 | Cd8 Hist+Mki67+ | Mrpl51        |
| 9.42E-57 | 0.348600528 | 0.734 | 0.433 | 1.51E-52 | Cd8 Hist+Mki67+ | Pa2g4         |
| 1.77E-56 | 0.295850724 | 0.422 | 0.183 | 2.84E-52 | Cd8 Hist+Mki67+ | Mcm4          |
| 3.78E-56 | 0.36666736  | 0.71  | 0.411 | 6.06E-52 | Cd8 Hist+Mki67+ | Sh2d1a        |
| 1.29E-55 | 0.265821409 | 0.337 | 0.133 | 2.07E-51 | Cd8 Hist+Mki67+ | Eomes         |
| 1.40E-55 | 0.336676162 | 0.83  | 0.548 | 2.24E-51 | Cd8 Hist+Mki67+ | Swi5          |
| 5.31E-55 | 0.284470333 | 0.996 | 0.981 | 8.51E-51 | Cd8 Hist+Mki67+ | Hspa8         |
| 5.23E-54 | 0.306141462 | 0.947 | 0.754 | 8.38E-50 | Cd8 Hist+Mki67+ | Psmb9         |
| 1.21E-53 | 0.317101778 | 0.803 | 0.491 | 1.94E-49 | Cd8 Hist+Mki67+ | Ddx39b        |

|          |             |       |       |          |                 |         |
|----------|-------------|-------|-------|----------|-----------------|---------|
| 4.95E-53 | 0.284626556 | 0.593 | 0.307 | 7.93E-49 | Cd8 Hist+Mki67+ | Ptpa    |
| 6.71E-53 | 0.311659832 | 0.842 | 0.558 | 1.08E-48 | Cd8 Hist+Mki67+ | Psmb6   |
| 1.00E-52 | 0.26124272  | 0.478 | 0.223 | 1.60E-48 | Cd8 Hist+Mki67+ | Dynll2  |
| 1.70E-52 | 0.305128194 | 0.96  | 0.809 | 2.73E-48 | Cd8 Hist+Mki67+ | Prelid1 |
| 1.73E-52 | 0.376030734 | 0.731 | 0.459 | 2.77E-48 | Cd8 Hist+Mki67+ | Rbbp4   |
| 2.22E-52 | 0.335336076 | 0.766 | 0.455 | 3.55E-48 | Cd8 Hist+Mki67+ | Rps27l  |
| 6.49E-52 | 0.339715219 | 0.92  | 0.714 | 1.04E-47 | Cd8 Hist+Mki67+ | Ndufa4  |
| 1.66E-51 | 0.298813428 | 0.737 | 0.434 | 2.66E-47 | Cd8 Hist+Mki67+ | Snrpc   |
| 2.93E-51 | 0.256625456 | 0.558 | 0.283 | 4.70E-47 | Cd8 Hist+Mki67+ | Snrnp40 |
| 3.58E-51 | 0.29682603  | 0.908 | 0.603 | 5.73E-47 | Cd8 Hist+Mki67+ | Ctsw    |
| 9.24E-51 | 0.29144777  | 0.921 | 0.69  | 1.48E-46 | Cd8 Hist+Mki67+ | Gdi2    |
| 1.23E-50 | 0.273035602 | 0.561 | 0.288 | 1.97E-46 | Cd8 Hist+Mki67+ | Bex3    |
| 3.29E-50 | 0.301887711 | 0.604 | 0.326 | 5.27E-46 | Cd8 Hist+Mki67+ | Mrpl42  |
| 5.25E-50 | 0.285042706 | 0.621 | 0.334 | 8.42E-46 | Cd8 Hist+Mki67+ | Actn4   |
| 9.03E-50 | 0.300000521 | 0.893 | 0.643 | 1.45E-45 | Cd8 Hist+Mki67+ | Snrpb   |
| 1.67E-48 | 0.275492844 | 0.71  | 0.396 | 2.68E-44 | Cd8 Hist+Mki67+ | Cyc1    |
| 6.07E-48 | 0.284320738 | 0.948 | 0.732 | 9.73E-44 | Cd8 Hist+Mki67+ | Reep5   |
| 1.79E-47 | 0.281820069 | 0.93  | 0.704 | 2.86E-43 | Cd8 Hist+Mki67+ | Ndufb11 |
| 3.20E-47 | 0.278859869 | 0.551 | 0.289 | 5.13E-43 | Cd8 Hist+Mki67+ | Cntrl   |
| 5.79E-47 | 0.277497674 | 0.965 | 0.786 | 9.28E-43 | Cd8 Hist+Mki67+ | Psmb3   |
| 6.69E-47 | 0.253637372 | 0.983 | 0.876 | 1.07E-42 | Cd8 Hist+Mki67+ | Rhoa    |
| 2.86E-46 | 0.303245195 | 0.739 | 0.449 | 4.59E-42 | Cd8 Hist+Mki67+ | Cycs    |
| 3.74E-46 | 0.283794439 | 0.744 | 0.446 | 5.99E-42 | Cd8 Hist+Mki67+ | Tcp1    |
| 6.91E-46 | 0.267555551 | 0.511 | 0.261 | 1.11E-41 | Cd8 Hist+Mki67+ | Snrpa   |
| 1.44E-45 | 0.278944775 | 0.637 | 0.352 | 2.31E-41 | Cd8 Hist+Mki67+ | Casp3   |
| 2.06E-45 | 0.30822536  | 0.712 | 0.428 | 3.30E-41 | Cd8 Hist+Mki67+ | Fundc2  |
| 3.11E-45 | 0.252638163 | 0.433 | 0.21  | 4.98E-41 | Cd8 Hist+Mki67+ | Cisd1   |
| 4.45E-45 | 0.250693039 | 0.626 | 0.344 | 7.14E-41 | Cd8 Hist+Mki67+ | Naa38   |
| 6.38E-45 | 0.279129603 | 0.843 | 0.581 | 1.02E-40 | Cd8 Hist+Mki67+ | Sf3b5   |
| 7.65E-45 | 0.338634566 | 0.904 | 0.68  | 1.23E-40 | Cd8 Hist+Mki67+ | Dynll1  |
| 7.72E-45 | 0.291644623 | 0.603 | 0.341 | 1.24E-40 | Cd8 Hist+Mki67+ | Smc6    |
| 1.33E-44 | 0.278157841 | 0.75  | 0.466 | 2.13E-40 | Cd8 Hist+Mki67+ | Manf    |
| 1.42E-44 | 0.301358908 | 0.86  | 0.589 | 2.27E-40 | Cd8 Hist+Mki67+ | Snrpf   |
| 2.78E-44 | 0.280906794 | 0.92  | 0.688 | 4.46E-40 | Cd8 Hist+Mki67+ | Eif4a1  |
| 3.70E-44 | 0.308604878 | 0.979 | 0.815 | 5.93E-40 | Cd8 Hist+Mki67+ | Ms4a4b  |
| 5.55E-44 | 0.279173978 | 0.835 | 0.563 | 8.90E-40 | Cd8 Hist+Mki67+ | Ywhae   |
| 5.98E-44 | 0.277518997 | 0.947 | 0.732 | 9.58E-40 | Cd8 Hist+Mki67+ | Atp5f1  |
| 8.77E-44 | 0.261283953 | 0.701 | 0.413 | 1.41E-39 | Cd8 Hist+Mki67+ | Txn1    |
| 1.15E-43 | 0.28650373  | 0.712 | 0.438 | 1.85E-39 | Cd8 Hist+Mki67+ | Hprt    |

|          |             |       |       |          |                 |         |
|----------|-------------|-------|-------|----------|-----------------|---------|
| 1.86E-43 | 0.259841373 | 0.576 | 0.317 | 2.97E-39 | Cd8 Hist+Mki67+ | Dnajc2  |
| 2.15E-43 | 0.264445048 | 0.87  | 0.601 | 3.45E-39 | Cd8 Hist+Mki67+ | Sept7   |
| 3.15E-43 | 0.291756035 | 0.775 | 0.483 | 5.04E-39 | Cd8 Hist+Mki67+ | Ndufc2  |
| 1.84E-42 | 0.252540765 | 0.602 | 0.337 | 2.95E-38 | Cd8 Hist+Mki67+ | Smchd1  |
| 1.93E-42 | 0.271828407 | 0.727 | 0.44  | 3.10E-38 | Cd8 Hist+Mki67+ | Eloc    |
| 2.10E-42 | 0.386279237 | 0.593 | 0.349 | 3.36E-38 | Cd8 Hist+Mki67+ | Plac8   |
| 4.31E-42 | 0.291332363 | 0.834 | 0.571 | 6.90E-38 | Cd8 Hist+Mki67+ | Atp5o.1 |
| 2.37E-40 | 0.270020389 | 0.788 | 0.523 | 3.80E-36 | Cd8 Hist+Mki67+ | Snrpg   |
| 2.78E-40 | 0.260290764 | 0.666 | 0.393 | 4.46E-36 | Cd8 Hist+Mki67+ | Ilk     |
| 5.72E-40 | 0.250443777 | 0.559 | 0.306 | 9.17E-36 | Cd8 Hist+Mki67+ | Klrk1   |
| 7.10E-40 | 0.258825213 | 0.812 | 0.549 | 1.14E-35 | Cd8 Hist+Mki67+ | Tpm4    |
| 7.47E-40 | 0.260525218 | 0.833 | 0.556 | 1.20E-35 | Cd8 Hist+Mki67+ | Ndufb8  |
| 1.48E-39 | 0.251426124 | 0.824 | 0.537 | 2.37E-35 | Cd8 Hist+Mki67+ | Ewsr1   |
| 7.12E-39 | 0.260108687 | 0.938 | 0.787 | 1.14E-34 | Cd8 Hist+Mki67+ | Atp5b   |
| 1.29E-37 | 0.250007142 | 0.725 | 0.456 | 2.07E-33 | Cd8 Hist+Mki67+ | Nono    |
| 1.67E-37 | 0.271503238 | 0.841 | 0.602 | 2.67E-33 | Cd8 Hist+Mki67+ | Sdhb    |
| 6.48E-37 | 0.250961722 | 0.88  | 0.67  | 1.04E-32 | Cd8 Hist+Mki67+ | Apobec3 |
| 1.09E-35 | 0.263938929 | 0.96  | 0.824 | 1.75E-31 | Cd8 Hist+Mki67+ | Mif     |
| 4.25E-35 | 0.254373954 | 0.864 | 0.602 | 6.82E-31 | Cd8 Hist+Mki67+ | Hnrnpa1 |
| 6.37E-35 | 0.255521318 | 0.865 | 0.635 | 1.02E-30 | Cd8 Hist+Mki67+ | Hnrnpu  |
| 3.43E-29 | 0.557205479 | 0.257 | 0.125 | 5.50E-25 | Cd8 Hist+Mki67+ | Trbv19  |

## Supplemental Table 4 : Hashtag Sequences per Treatment

| IgG                                                          |
|--------------------------------------------------------------|
| <b>Hashtag 1</b>                                             |
| TRA:CALGNQGGRALIF;TRA:CAVKGGRALIF;TRB:CTCSAAGAEVFF, 12       |
| TRA:CAASEISGSFNKLTFF;TRB:CGAREGAGQDTQYF, 9                   |
| TRA:CAVSYSNNRIFF;TRB:CASSQETFQDTQYF, 8                       |
| TRA:CAASRAGSALGRLHF;TRA:CATDMGYKLTFF;TRB:CASSQEKGAGNERLFF, 6 |
| TRA:CALTMTNSAGNKLTFF;TRB:CASRQGWNQNTLYF, 6                   |
|                                                              |
| <b>Hashtag 2</b>                                             |
| TRA:CAVSRGSALGRLHF;TRB:CSSSQRGRGERLFF, 51                    |
| TRA:CAAKGNTGNYKYVFF;TRB:CASSQEWGGEQYF, 17                    |
| TRA:CAVNTNTGKLTFF;TRB:CASSPDRGQDTQYF, 15                     |
| TRA:CAAGLGAKLTFF;TRA:CALGYAQLTFF;TRB:CASGDARQDTQYF, 14       |
| TRA:CAAYTGYQNFYF;TRB:CASGGWGVGEQYF, 13                       |
|                                                              |
| <b>Hashtag 3</b>                                             |
| TRA:CSAKNAGAKLTFF;TRB:CASGDGTISNERLFF, 13                    |
| TRA:CAASDGTNTGKLTFF;TRB:CASSSGLGAETLYF, 8                    |
| TRA:CAAEAASSGQKLVFF;TRB:CASSQAGHSGNTLYF, 7                   |
| TRA:CAASTGNYQLIW, 6                                          |
| TRA:CALGDYINVLYF;TRB:CASGDSYNSPLYF, 6                        |
|                                                              |
| <b>Hashtag 4</b>                                             |
| TRA:CAVRTPDYANKMIF;TRB:CASSLNTGQLYF, 81                      |
| TRA:CAAKDYSNNRLTL;TRB:CASSVGLGEDTQYF, 71                     |
| TRA:CAATDYSNNRLTL;TRB:CASSLELGGLEQYF, 55                     |
| TRA:CILRVSGGNNKLTFF;TRB:CASSLSGGWYAEQFF, 31                  |
| TRA:CAAEDYSNNRLTL;TRB:CASSQVQGS AETLYF, 20                   |
|                                                              |
| <b>Hashtag 5</b>                                             |
| TRA:CALGEDYSNNRLTL;TRB:CASSQTRDWAYEQYF, 103                  |
| TRA:CATAPSSGSWQLIF;TRB:CASGDDWGSQNTLYF, 16                   |
| TRA:CATDDYSNNRLTL;TRB:CASSLHTNSDYTF, 16                      |
| TRA:CVLSAGSNNRIFF;TRB:CASRQQGNTGQLYF, 16                     |
| TRA:CAASMMDSNYQLIW;TRB:CASGDWRKDTQYF, 13                     |
|                                                              |

## Anti-GITR

### Hashtag 1

TRA:CAVSVNYNQGLIF;TRB:CASSRGGGHSGNTLYF, 14

TRA:CAAPNSGTYQRF;TRB:CASGEGQQDTQYF, 5

TRA:CAASATGYQNFYF;TRB:CASSPGTGGYEQYF, 5

TRA:CAAGDSGYNKLTF;TRB:CASSRTVYEQYF, 4

TRA:CAASVGYNQGLIF;TRB:CASSGGQGIANSDYTF, 4

### Hashtag 2

TRA:CAAKDYSNNRRTL;TRB:CASSQDKGANTEVFF, 73

TRA:CALSEPNSNNRIFF;TRA:CALDMNYNQGLIF;TRB:CASSFGTGQLYF, 61

TRA:CAMERDYSNNRRTL;TRB:CASSLELGGTEQFF, 44

TRA:CALSGASSGSWQLIF;TRB:CASSGTISNERLFF, 20

TRA:CALGDRGSGSWQLIF;TRB:CASSITSQNTLYF, 14

### Hashtag 3

TRA:CAMRDPGTQVVGQLTF;TRA:CALSDDYSNNRRTL;TRB:CASSPPGSSETLYF, 72

TRA:CSASNPDYSNNRRTL;TRB:CASSRTGGSQNTLYF, 33

TRA:CALSPDYSNNRRTL;TRB:CASSQVPDPNSDYTF, 25

TRA:CALSDDYSNNRRTL;TRB:CASSQGQGSQNTLYF, 21

TRA:CAAREDYSNNRRTL;TRB:CASSHPGAETLYF, 20

### Hashtag 4

TRA:CAAGMSNYNVLYF;TRB:CTCSAENSGNTLYF, 3

TRA:CALGFGGSNAKLTF;TRB:CASSRLGGYEQYF, 3

TRA:CAAQGTGSKLSF;TRB:CASGDARVYEQYF, 2

TRA:CALARYGSSGNKLIF;TRB:CASSPRTAGNTLYF, 2

TRA:CARYNRIF;TRA:CALGEANTNKVVF;TRB:CGAGLGPSQNTLYF, 2

### Hashtag 5

TRA:CSAKDYSNNRRTL;TRB:CASSQVQGANERLFF, 292

TRA:CALNGNYGSSGNKLIF;TRA:CALRGTTASLGKLQF;TRB:CASSGGDQNTLYF, 34

TRA:CAAMDYSNNRRTL;TRB:CASSQGQGADTEVFF, 21

TRA:CAANTGANTGKLTF;TRB:CASSDVISYEQYF, 15

TRA:CALRDYNVLYF;TRB:CASSSGTGSQDTQYF, 14

## CTX+IgG

### Hashtag 1

TRA:CAAKDYSNNRRTL;TRB:CASSQVGNNERLFF, 85

|                                                               |
|---------------------------------------------------------------|
| TRA:CAAGGDTNAYKVIF;TRA:CALGADSGGSNAKLTF;TRB:CAWSGGSAETLYF, 57 |
| TRA:CAAGGDTNAYKVIF;TRB:CAWSGGSAETLYF, 19                      |
| TRA:CAAKDYSNNRLTL;TRB:CASSPPGSQNTLYF, 16                      |
| TRA:CAVSPPD TNAYKVIF;TRB:CASSHRDWGGAENTLYF, 13                |
| <b>Hashtag 2</b>                                              |
| TRA:CAMESSGSWQLIF;TRB:CASSRQGSNSDYTF, 19                      |
| TRA:CAASEGTGNTGKLIF;TRB:CGASTNNERLFF, 16                      |
| TRA:CALSSNTNKVVF;TRB:CASGAGTGGQNTLYF, 15                      |
| TRA:CALSGSSGSWQLIF;TRB:CASRTANSDYTF, 14                       |
| TRA:CAMRDQGGSAKLIF;TRB:CASSDEGRIYEQYF, 14                     |
| <b>Hashtag 3</b>                                              |
| TRA:CALGGDTNAYKVIF;TRA:CALVDLSGSGGKLT;TRB:CASTPLSSNTEVFF, 107 |
| TRA:CALGGDTNAYKVIF;TRB:CASTPLSSNTEVFF, 48                     |
| TRA:CAMREASSGSWQLIF;TRB:CASSLDPSSSAETLYF, 15                  |
| TRA:CAASGYNQKGLIF;TRA:CAPHGSSGNKLIF;TRB:CASSSTGGSYEQYF, 13    |
| TRA:CAASRANSQTYQRF, 12                                        |
| <b>Hashtag 4</b>                                              |
| TRA:CALGHDTNAYKVIF;TRB:CASSIRGVTEVFF, 89                      |
| TRA:CALGHDTNAYKVIF;TRB:CASSYSGNTLYF, 52                       |
| TRB:CASSRTGFTEVFF, 63                                         |
| TRA:CALGDPWQGGRALIF;TRB:CGARGQASAETLYF, 49                    |
| TRA:CALSSDTNAYKVIF;TRB:CASSRTGFTEVFF, 48                      |
| <b>Hashtag 5</b>                                              |
| TRA:CAASEEGTQVVGQLTF;TRB:CASSFGLGGRQNTLYF, 16                 |
| TRA:CARLAQGLTF;TRB:CASSRLGGASAETLYF, 14                       |
| TRA:CANHNAGAKLTF;TRB:CASGDAWGSNERLFF, 12                      |
| TRA:CAASGANTGKLTF;TRB:CASSPQGDTGQLYF, 10                      |
| TRA:CALTGANTGKLTF;TRB:CGAVDWDQDTQYF, 8                        |
| <b>CTX+Anti-GITR</b>                                          |
| <b>Hashtag 1</b>                                              |
| TRA:CADTGNYKYVF;TRA:CALGGDTNAYKVIF;TRB:CASSIQGSNTEVFF, 72     |
| TRA:CAVSPPDYSNNRLTL;TRB:CASSSGGQDTQYF;TRB:CGAREGGGYEQYF, 55   |
| TRA:CALGHDTNAYKVIF;TRA:CALGGDTNAYKVIF;TRB:CASSLLGSQNTLYF, 52  |
| TRA:CALGGDTNAYKVIF;TRB:CASSLLGSQNTLYF, 49                     |

|                                                             |
|-------------------------------------------------------------|
| TRA:CAVSPPDYSNNRLTL;TRB:CASSSSGGQDTQYF, 18                  |
| <b>Hashtag 2</b>                                            |
| TRA:CALGHDTNAYKVIF;TRB:CASTINYAEQFF, 154                    |
| TRA:CALGHDTNAYKVIF;TRA:CALGGDTNAYKVIF;TRB:CASTINYAEQFF, 37  |
| TRA:CALSEDYSNNRLTL;TRB:CGATGGGPYEQYF, 34                    |
| TRA:CAASPDYSNNRLTL;TRB:CASSLEGKGQDTQYF, 32                  |
| TRA:CALGTQVVGQLTF;TRB:CASSGTISNERLFF, 32                    |
| <b>Hashtag 3</b>                                            |
| TRA:CAMEQDYSNNRLTL;TRB:CASSLELGGLEQYF, 180                  |
| TRA:CAVSDSNYQLIW;TRB:CASRTGSDYTF, 73                        |
| TRA:CALEGDYANKMIF;TRB:CASSENSYEQYF, 63                      |
| TRA:CAASWSGGSNYKLTF;TRB:CASSQDRGYEQYF, 55                   |
| TRA:CAVSNSGTYQRF;TRA:CALGNYQLIW;TRB:CASSQDGVGQLYF, 42       |
| <b>Hashtag 4</b>                                            |
| TRA:CAASTLNSNNRIFF;TRB:CASTWTGYAEQFF, 101                   |
| TRA:CAASANTNKVVF;TRA:CALSGGSNAKLTFF;TRB:CASRETGGYEQYF, 42   |
| TRA:CAVSASSGSWQLIF;TRB:CASSQGGQGYNSPLYF, 34                 |
| TRA:CAVSISYNQGKLIF;TRB:CASSFSLSGNTLYF, 24                   |
| TRA:CAASPPSGTYQRF;TRB:CASSQTGGYTEVFF, 23                    |
| <b>Hashtag 5</b>                                            |
| TRA:CAVMDSNYQLIW;TRB:CASSLVGTGNAEQFF, 56                    |
| TRA:CAASGDTNAYKVIF;TRB:CASSISGGDEQYF, 24                    |
| TRA:CALSRTQVVGQLTF;TRB:CASSAGTNSAETLYF, 16                  |
| TRA:CALGHDTNAYKVIF;TRB:CATTWVSGNTLYF, 11                    |
| TRA:CAVMDSNYQLIW;TRB:CASSLELGGLEQYF;TRB:CASSLVGTGNAEQFF, 10 |



## Supplemental Table 5: Antibody List

|                           | <b>Flourophore</b> | <b>Clone</b> | <b>Manufacturer</b> | <b>Catalog #</b> |
|---------------------------|--------------------|--------------|---------------------|------------------|
| anti-CD8a                 | PE-Texas red       | 5H10         | Thermofisher        | MCD0817          |
| anti-CD4                  | V450               | RM4-5        | BD Horizon          | 560468           |
| anti-Foxp3                | Alexa700           | FJK-16s      | Thermofisher        | 56-5773-82       |
| anti-Foxp3                | APC                | FJK-16s      | Thermofisher        | 17-5773-82       |
| anti-Ki67                 | FITC               | B56          | BD Bioscience       | 556026           |
| anti-GITR                 | APC                | DTA-1        | Thermofisher        | 17-5874-81       |
| anti-PD-1                 | eFlour450          | RMP1-30      | Thermofisher        | 48-9981-82       |
| anti-CD25                 | PercpCy5.5         | PC61         | BD Bioscience       | 561112           |
| anti-KLRG1                | PE-CF594           | 2F1          | BD Bioscience       | 565393           |
| anti-Blimp-1              | PE                 | 5 E7         | Thermofisher        | 12-9850-82       |
| anti-Eomes                | V450               | Dan11mag     | Thermofisher        | 48-4875-82       |
| anti-T-bet                | PercpCy5.5         | O4-46        | BD Bioscience       | 561316           |
| anti-CD4                  | PE Texas red       | RM4-5        | BD Bioscience       | MCD0417          |
| anti-CD8                  | BV650              | 53-6.7       | BD Bioscience       | 563234           |
| anti-Thy1.1               | PE-Cy7             | HIS51        | Thermofisher        | 25-0900-82       |
| anti-CD44                 | Pacific blue       | IM7          | Biologend           | 103020           |
| anti-IFNg                 | PercpCy5.5         | XMG1.2       | Thermofisher        | 45-7311-82       |
| anti-TNF                  | APC                | MP6-XT22     | BD Bioscience       | 554420           |
| Ant-CD5                   | PE                 | 53-7         | BD Bioscience       | 553022           |
| Fc-block                  |                    | 2.4G2        | MSKCC Antibody core |                  |
| Anti-GITR                 | In vivo injection  | DTA-1        | Bioxcell            | BE0063           |
| rat IgG2b isotype control | In vivo injection  | LTF-2        | Bioxcell            | BE0090           |
